# Supplementary material for: A Framework for Soft Mechanism Driven Robots
Source: Research Square preprint supplement (doi:10.21203/rs.3.rs-4109720/v1), 2024-03-28
Supplement: Supplementary file 1 [file xy_body_coordinates_final2_normalized.xlsx]

## Sheet: Sheet1
95A / 75D	95A / 75D	85A / 75D	85A / 75D	Vertical	Vertical	Wide	Wide	85A / 95A	85A / 95A
672.246	-332.41	684.513	-328.62	666.011	-339.394	663.379	-312.875	678.221	-333.172
672.5	-332.341	684.549	-328.507	664.627	-338.973	663.395	-312.977	676.6	-333.063
672.269	-332.36	683.443	-328.348	665.812	-339.288	663.366	-312.914	673.793	-332.445
672.45	-332.117	682.469	-328.523	662.262	-338.097	663.339	-312.95	669.563	-331.141
672.4	-331.952	681.29	-328.83	661.058	-337.755	663.369	-312.948	664.864	-330.787
671.937	-331.861	679.647	-329.319	663.217	-338.333	663.277	-312.992	665.143	-331.696
670.555	-331.982	677.106	-329.4	665	-338.982	663.305	-312.953	667.435	-333.887
669.839	-332.018	676.99	-330.272	661.15	-338.05	663.161	-312.807	666.089	-333.534
669.911	-331.693	676.149	-330.992	662.724	-338.4	662.085	-312.237	664.765	-334.192
670.815	-331.726	675.233	-331.661	663.82	-339.3	659.886	-311.741	666.979	-334.057
671.359	-331.853	676.079	-332.563	664.995	-340.308	656.825	-312.029	668.606	-334.255
671.94	-332.227	674.67	-332.232	660.418	-339.927	651.576	-313.179	669.664	-334.068
670.441	-332.009	677.026	-332.432	658.99	-340.048	643.642	-314.89	671.846	-334.423
669.964	-331.856	676.658	-332.236	663.297	-342.279	639.24	-313.005	672.607	-333.14
670.584	-331.801	676.987	-331.361	655.708	-340.259	639.009	-310.757	672.305	-331.938
670.977	-331.641	676.469	-330.069	655.249	-341.171	638.705	-310.921	669.881	-329.888
671.872	-331.954	675.063	-329.114	652.245	-341.29	638.981	-311.843	667.57	-329.319
671.769	-332.191	673.251	-328.648	655.566	-343.52	642.642	-313.03	665.044	-328.564
670.287	-331.908	671.394	-329.161	656.4	-344.667	647.546	-315.279	662.319	-328.109
671.18	-332.194	669.714	-329.366	651.412	-342.376	650.833	-314.836	659.91	-327.552
671.791	-332.15	668.349	-329.099	655.981	-344.952	652.787	-314.998	656.628	-328.065
671.472	-332.042	667.194	-329.171	642.968	-338.021	650.85	-315.218	653.129	-329.048
671.404	-331.899	664.651	-330.31	649.655	-341.972	648.266	-315.4	648.841	-330.466
670.305	-331.766	657.235	-331.642	651.36	-342.373	646.568	-315.845	644.744	-333.183
670.458	-332.021	658.133	-334.526	649.911	-341.533	643.107	-316.1	642.589	-333.119
670.171	-331.809	655.987	-333.92	652.283	-341.667	637.83	-316.906	643.185	-333.387
670.451	-331.746	654.518	-334.247	654.166	-342.29	631.516	-317.316	642.771	-333.47
670.757	-331.906	654.603	-334.314	643.461	-337.757	626.942	-318.074	641.484	-333.686
671.07	-331.93	651.287	-333.78	645.338	-337.625	619.743	-319.854	641.756	-333.661
670.403	-331.95	649.594	-333.461	646.58	-337.129	617.961	-320.965	642.01	-333.603
670.491	-332.063	654.11	-334.662	644.723	-334.531	619.879	-321.597	641.877	-333.823
671.383	-332.29	654.237	-334.259	639.074	-330.835	623.827	-321.055	640.804	-333.775
671.806	-332.304	651.406	-333.444	637.84	-329.584	630.641	-320.252	638.626	-333.423
671.701	-332.143	651.794	-333.712	635.939	-329.65	633.193	-319.332	637.05	-333.257
671.517	-332.281	650.544	-333.502	633.342	-329.165	629.736	-318.264	635.394	-333.227
671.132	-332.258	647.6	-332.86	633.578	-328.91	627.068	-316.979	632.2	-332.885
670.992	-332.29	642.828	-331.539	634.975	-329.076	625.682	-315.852	628.602	-332.314
670.717	-332.094	640.963	-330.948	625.242	-325.595	624.329	-314.683	625.041	-331.756
670.982	-332.112	636.094	-329.984	632.914	-327.392	622.676	-313.677	620.27	-330.204
671.686	-332.157	632.27	-329.125	633.205	-327.422	621.061	-312.838	616.285	-330.05
671.133	-332.112	633.63	-331.053	631.34	-327.642	620.871	-312.624	616.759	-331.924
671.178	-332.316	632.443	-331.682	623.735	-327.065	618.573	-311.885	617.976	-333.079
671.063	-332.123	631.605	-332.229	627.931	-330.538	614.429	-311.975	615.859	-333.143
670.844	-331.981	631.908	-332.342	622.3	-330.277	610.113	-312.6	615.734	-333.233
670.979	-332.097	632.461	-332.428	625.717	-332.621	605.193	-314.142	617.762	-333.393
671.866	-332.315	633.403	-332.507	623.973	-334.009	598.173	-314.588	618.861	-333.451
671.101	-332.105	633.091	-331.579	623.445	-337.478	596.238	-312.67	620.271	-333.738
671.073	-332.312	632.894	-330.073	621.888	-341.988	596.945	-311.403	622.093	-333.603
671.427	-332.341	632.535	-329.135	620.433	-343	598.666	-312.15	623.002	-333.002
671.329	-332.15	630.837	-328.526	612.69	-340.621	603.266	-313.8	622.417	-331.275
671.128	-332.07	628.24	-328.368	613.624	-341.648	606.39	-313.816	621.513	-329.848
670.724	-332.131	622.351	-328.141	615.614	-343.697	605.765	-314.056	619.471	-329.083
671.608	-332.447	624.551	-328.985	609.9	-341.58	605.681	-314.158	617.13	-327.93
670.752	-332.259	621.915	-328.625	603.771	-338.724	605.584	-314.181	615.064	-327.617
671.237	-332.284	619.694	-328.878	607.353	-340.153	606.882	-314.466	612.137	-327.646
670.616	-332.099	618.464	-330.704	603.978	-338.6	607.471	-314.499	608.696	-327.643
671.325	-332.334	614.829	-333.582	608.448	-341.168	607.095	-314.357	605.125	-328.149
671.339	-332.413	613.419	-334.181	604.428	-338.13	607.203	-314.506	601.879	-329.13
671.406	-332.498	613.387	-334.29	606.671	-339.045	605.932	-314.5	597.92	-331.57
671.515	-332.367	612.817	-334.917	604.069	-337.177	603.689	-314.759	593.762	-332.506
671.163	-332.215	607.589	-333.747	607.14	-338.07	601.02	-314.764	593.736	-332.569
671.179	-332.273	611.733	-334.417	604.195	-336.465	599	-315.226	594.2	-332.953
671.344	-332.332	612.395	-334.734	606.015	-335.23	596.64	-315.327	593.289	-332.927
671.675	-332.568	610.286	-333.991	594.427	-329.573	593.325	-315.728	592.368	-333.049
671.69	-332.565	606.083	-333.005	597.605	-330.178	589.206	-316.443	592.847	-333.014
671.66	-332.515	606.222	-333.232	597.721	-330.389	584.372	-316.994	592.908	-333.166
671.631	-332.405	604.319	-332.631	589.543	-327.233	578.645	-317.718	592.714	-333.327
671.625	-332.491	605.369	-332.935	595.045	-328.982	574.557	-318.973	591.512	-333.142
671.684	-332.509	601.435	-332.18	590.334	-326.962	575.125	-320.043	589.47	-332.913
671.645	-332.493	598.918	-331.567	594.694	-328.061	578.318	-320.278	587.928	-332.834
671.654	-332.477	596.36	-330.652	589.6	-325.553	579.854	-320.013	585.476	-332.347
671.723	-332.349	591.459	-329.555	597.19	-327.662	578.303	-320.378	581.993	-331.985
671.742	-332.367	587.81	-329.278	595.835	-327.17	581.502	-320.526	578.209	-331.529
671.718	-332.406	588.933	-331.63	592.532	-327.753	586.466	-320.176	574.606	-330.879
671.624	-332.445	587.609	-331.544	592.483	-329.787	588.312	-319.33	569.816	-329.511
671.653	-332.465	586.686	-331.977	588.552	-330.413	586.79	-318.273	567.036	-329.866
671.702	-332.553	587.205	-332.109	587.453	-330.533	584.234	-316.953	568.746	-332.366
671.703	-332.534	587.635	-332.13	586.421	-331.586	582.957	-315.708	568.536	-332.136
671.688	-332.501	587.047	-331.664	585.496	-334.408	581.703	-314.773	565.608	-332.381
671.649	-332.503	587.465	-330.535	579.906	-336.839	579.655	-313.852	566.562	-332.383
671.615	-332.5	585.305	-328.838	582.39	-342.36	578.981	-313.142	568.397	-332.704
670.992	-332.153	584.649	-327.995	577.9	-341.68	577.893	-312.64	569.767	-332.818
671.297	-332.325	584.811	-327.9	578.39	-343.162	575.119	-312.39	571.666	-333.012
671.338	-332.345	581.925	-327.962	581.019	-345.29	570.852	-312.052	572.919	-332.803
671.665	-332.392	581.448	-328.708	574.426	-343.161	567.288	-312.524	573.673	-331.738
671.354	-332.232	577.705	-328.105	574.335	-343.394	562.176	-313.563	573.189	-330.04
671.317	-332.234	575.551	-328.424	569.886	-341.577	555.228	-314.914	571.646	-328.962
671.738	-332.429	575.58	-329.271	570.558	-342.011	552.309	-313.621	569.337	-328.081
671.754	-332.429	571.795	-331.432	573.503	-342.919	554.17	-312.312	567.884	-327.266
671.673	-332.466	568.554	-334.023	572.789	-341.611	557.763	-312.705	564.953	-327.173
671.09	-332.367	568.515	-334.224	573.426	-340.878	560.726	-313.832	561.292	-326.946
671.504	-332.488	567.681	-334.255	567.635	-338.176	561.191	-313.831	557.755	-326.848
671.223	-332.297	567.668	-334.447	570.263	-338.634	561.382	-314.137	554.346	-327.557
670.996	-332.299	568.056	-334.622	570.752	-338.41	560.771	-314.072	551.554	-329.226
670.957	-332.266	568.308	-334.636	569.621	-336.676	560.836	-314.264	547.097	-332.012
670.918	-332.254	568.273	-334.592	563.595	-332.805	561.876	-314.492	544.504	-332.22
670.894	-332.153	566.349	-333.944	561.018	-330.873	562.108	-314.397	544.539	-332.29
670.883	-332.277	565.541	-333.865	560.279	-330.329	561.925	-314.397	544.448	-332.38
671.657	-332.537	565.028	-333.828	556.751	-328.976	561.339	-314.287	543.293	-332.518
671.261	-332.363	562.259	-333.005	556.263	-328.581	560.106	-314.291	542.586	-332.586
670.955	-332.266	560.124	-332.647	554.677	-328.01	557.742	-314.411	543.389	-332.716
671.355	-332.454	556.926	-331.768	556.995	-328.049	555.713	-314.471	543.543	-332.859
671.462	-332.46	551.63	-330.175	556.291	-327.294	553.209	-314.721	543.155	-332.858
671.688	-332.485	548.241	-329.427	555.881	-326.602	550.556	-315.061	541.644	-332.524
671.637	-332.492	544.941	-328.804	555.097	-325.964	547.716	-315.492	539.478	-332.251
671.7	-332.508	543.97	-330.034	555.327	-326.61	544.586	-315.955	537.631	-331.825
671.588	-332.427	542.625	-330.8	556.005	-328.605	540.019	-316.547	534.928	-331.594
671.539	-332.456	543.367	-331.257	552.121	-329.036	534.559	-317.043	531.41	-331.338
671.623	-332.49	543.366	-331.813	551.594	-329.194	528.356	-318.227	528.456	-331.027
671.722	-332.506	544.062	-331.757	548.26	-328.74	525.235	-319.321	524.403	-330.099
671.454	-332.425	543.834	-331.524	541.642	-328.279	526.661	-320.537	519.726	-329.284
671.762	-332.43	544.353	-331.157	530.564	-327.606	530.216	-320.087	518.411	-330.068
671.605	-332.435	543.902	-329.805	544.867	-340.227	533.507	-319.899	519.698	-331.747
671.608	-332.447	543.453	-328.744	542.411	-342.233	533.035	-319.969	518.721	-331.85
671.686	-332.553	540.84	-327.79	537.738	-341.379	534.844	-320.269	517.2	-332.078
671.074	-332.297	539.002	-327.825	536.282	-342.024	538.634	-319.623	518.277	-332.2
671.064	-332.301	537.701	-328.278	535.456	-341.952	540.436	-318.507	519.663	-332.337
671.788	-332.509	536.099	-328.296	540.83	-338.883	538.639	-317.361	520.682	-332.348
671.221	-332.379	534.37	-328.105	533.045	-341.796	535.617	-315.847	522.207	-332.49
670.842	-332.184	532.252	-328.605	532.518	-341.509	534.323	-314.64	523.561	-332.17
670.745	-332.192	529.551	-329.908	537.528	-344.133	532.853	-314.161	523.588	-330.776
671.053	-332.324	525.911	-332.521	532.287	-340.708	531.062	-313.354	523.2	-329.113
669.91	-331.876	523.709	-333.812	531.392	-339.384	529.828	-312.622	521.71	-328.222
670.148	-331.821	522.984	-333.777	531.015	-338.702	528.074	-312.102	519.714	-327.324
669.558	-331.78	522.959	-334.576	533.06	-339.005	525.323	-311.606	517.771	-326.58
669.605	-331.889	522.779	-334.608	529.404	-337.035	522.017	-311.494	514.199	-326.601
668.407	-331.394	523.107	-334.385	526.9	-335.333	518.456	-312.167	510.373	-326.305
668.308	-331.453	523.205	-334.626	526.513	-333.6	513.245	-313.585	507.37	-326.803
666.769	-331.051	522.77	-334.192	518.246	-328.846	506.585	-314.548	504.16	-328.033
666.251	-330.971	520.307	-333.629	523.386	-330.614	503.821	-312.869	500.212	-330.063
664.491	-330.388	519.968	-333.819	516.312	-327.922	506.164	-311.718	495.663	-331.72
663.481	-329.767	518.705	-333.674	520.611	-329.45	509.005	-312.227	494.98	-331.768
661.286	-328.429	516.406	-333.159	518.41	-328.481	511.666	-313.738	496.056	-331.87
657.747	-327.035	514.144	-332.306	518.849	-328.296	513.509	-313.657	495.134	-332.079
659.01	-328.08	510.719	-331.535	518.179	-327.774	513.983	-313.963	493.399	-332.318
661.258	-330.136	507.454	-330.507	518.368	-327.083	513.069	-313.957	494.181	-332.173
660.991	-330.088	502.844	-329.511	518.754	-326.923	512.077	-313.94	494.266	-332.408
661.521	-330.169	499.516	-329.032	518.899	-326.815	513.421	-314.034	494.082	-332.482
661.413	-330.072	500.392	-331.068	520.8	-326.415	513.021	-313.955	493.423	-332.374
661.492	-329.703	499.183	-331.458	517.611	-329.495	513.28	-314.066	491.761	-332.207
660.344	-327.843	498.817	-331.77	513.187	-329.975	512.919	-314.016	490.003	-332.019
661.277	-326.369	498.325	-331.7	510.716	-329.839	511.426	-314.203	487.815	-331.701
661.205	-326.174	499.448	-331.604	506.548	-328.632	508.744	-314.342	484.717	-331.291
657.447	-327.281	499.69	-331.453	496.605	-324.59	505.976	-314.75	481.21	-330.933
654.831	-328.56	499.551	-330.44	500.275	-330.838	503.424	-314.864	478.311	-330.855
654.824	-329.311	499.251	-329.043	501.633	-337.578	500.52	-315.246	474.257	-329.501
652.14	-330.178	498.694	-328.262	501.653	-340.853	497.519	-315.627	470.057	-329.125
650.282	-332.066	496.909	-327.647	498.183	-340	493.584	-316.277	469.54	-330.608
650.345	-333.112	494.444	-327.768	498.15	-341.4	488.464	-316.846	470.67	-331.816
649.439	-333.253	492.645	-328.075	499.148	-342.417	482.57	-317.826	469.448	-331.899
648.988	-333.286	490.8	-327.98	498.413	-343.138	479.486	-319.277	468.732	-332.068
648.428	-333.394	489.2	-328.079	500.37	-344.34	479.627	-320.385	469.771	-332.05
647.35	-333.269	486.354	-329.189	499.017	-343.611	482.89	-320.16	470.942	-332.137
647.479	-333.432	481.861	-330.422	497.922	-342.635	485.898	-320.012	472.048	-332.169
646.971	-333.483	478.675	-333.501	487.867	-336.989	485.202	-320.359	473.972	-332.317
647.034	-333.487	479.008	-333.584	494.714	-338.667	487.475	-320.565	474.749	-331.88
646.668	-333.4	478.682	-334.171	497.678	-340.293	492.169	-320.188	474.932	-330.25
646.412	-333.467	478.464	-334.363	493.776	-338.117	493.72	-319.195	474.2	-328.74
646.441	-333.587	478.456	-334.268	491.344	-336.296	492.765	-318.227	472.216	-327.691
646.433	-333.602	478.049	-334.268	492.24	-335.513	489.967	-316.853	470.428	-326.932
646.08	-333.349	478.161	-334.346	486.681	-331.863	489.027	-315.622	468.085	-326.133
645.498	-333.085	475.273	-333.521	488.363	-332.098	487.929	-314.568	464.669	-326.54
644.29	-332.858	474.926	-333.509	483.733	-329.606	485.972	-313.691	461.05	-326.323
644.011	-332.852	474.631	-333.701	482.206	-328.982	484.469	-313.015	457.746	-326.858
644.22	-332.777	473.361	-333.421	481	-328.211	483.914	-312.538	454.438	-328.513
644.421	-332.868	471.158	-332.695	479.695	-327.547	480.506	-312.098	449.925	-331.286
643.028	-332.406	468.375	-332.03	480.233	-327.397	476.604	-311.782	447.239	-331.639
642.75	-332.417	465.319	-331.037	481.236	-327.19	473.278	-312.06	447.366	-331.525
642.19	-332.093	461.643	-330.122	481.617	-326.711	468.959	-313.177	447.339	-331.878
641.18	-331.889	456.849	-329.175	481.966	-326.479	462.274	-315.176	445.842	-331.901
640.267	-331.593	456.204	-330.008	480.232	-326.084	457.973	-314.328	444.733	-331.958
639.35	-331.549	456.034	-331.285	479.774	-327.468	458.855	-312.608	445.572	-331.913
638.686	-331.245	455.02	-331.661	477.194	-328.872	462.411	-312.21	445.57	-332.061
637.853	-331.133	454.311	-331.814	476.261	-330.376	465.248	-314.009	445.548	-332.39
637.233	-330.852	454.576	-331.806	467.742	-326.74	467.149	-313.9	445.115	-332.218
636.804	-330.818	455.484	-331.804	469.452	-328.308	467.307	-314.307	443.237	-332.11
635.644	-330.321	455.452	-331.526	457.605	-323.937	467.043	-314.211	441.566	-331.945
633.931	-329.52	455.103	-330.202	465.467	-332.904	465.696	-314.335	439.005	-331.662
632.606	-328.662	454.706	-328.876	466.949	-340.274	466.697	-314.384	435.499	-331.127
629.695	-327.221	453.504	-328.157	467.256	-342.367	467.863	-314.355	432.508	-330.901
630.425	-327.579	450.978	-328.027	464.857	-341.817	467.184	-314.497	429.707	-330.684
631.647	-329.002	448.982	-328.4	463.245	-342.527	466.648	-314.586	426.033	-329.621
631.671	-329.322	447.311	-328.476	461.695	-342.352	465.53	-314.512	421.595	-329.152
631.374	-329.515	445.595	-328.329	459.88	-341.68	463.351	-314.877	421.12	-330.323
631.844	-329.984	443.61	-328.472	461.951	-342.917	460.968	-314.92	422.858	-331.691
631.456	-329.856	440.927	-329.678	461.774	-343.005	458.303	-315.297	421.001	-331.84
632.093	-329.845	437.667	-332.092	458.124	-340.8	455.686	-315.678	420.39	-332.05
631.733	-329.658	434.123	-334.246	456.181	-338.61	452.958	-316.139	422.161	-332.135
630.784	-329.429	434.517	-334.246	456.73	-338.296	449.88	-316.476	423.419	-332.092
630.874	-328.498	434.173	-334.148	457.689	-338.604	445.524	-317.117	424.301	-332.245
630.855	-326.69	433.768	-334.726	457.26	-337.82	440.201	-317.905	425.582	-332.174
628.649	-326.22	433.967	-334.597	447.386	-332.107	435.272	-319.003	426.625	-331.566
626.352	-327.513	434.061	-334.911	454.992	-334.754	433.147	-320.391	426.327	-330.003
624.868	-328.33	433.705	-334.653	445.702	-329.156	434.765	-321.054	424.852	-328.629
623.684	-329.487	432.118	-334.194	446.615	-328.929	437.043	-320.463	423.94	-328.169
621.17	-331.017	430.748	-334.087	446.55	-329.039	437.037	-320.94	421.582	-327.409
619.774	-332.549	430	-334.047	444.411	-328.186	438.236	-321.147	418.257	-326.771
618.793	-332.578	427.491	-333.56	444.017	-327.978	442.791	-321.287	414.792	-326.691
618.342	-332.74	425.657	-333.126	444.096	-327.877	446.434	-320.728	411.735	-326.85
617.711	-333.003	423.031	-332.55	443.074	-327.032	445.77	-319.815	408.741	-327.628
617.257	-333.039	420.129	-331.715	444.646	-327.108	442.973	-318.515	405.203	-329.322
616.359	-332.97	417.561	-331.071	444.605	-326.579	441.034	-317.13	399.151	-331.519
616.429	-333.095	413.152	-330.339	445.564	-326.982	440.755	-316.201	397.804	-331.659
616.271	-333.08	409.96	-330.044	444.25	-327.211	439.213	-315.187	398.655	-331.717
615.993	-333.143	411.583	-332.059	442.506	-328.756	438.382	-314.303	397.338	-331.65
615.799	-333.2	409.363	-331.714	433.877	-326.917	437.438	-313.564	396.757	-332.274
615.499	-333.054	410.057	-332.283	431.189	-326.721	435.165	-312.999	396.951	-332.278
615.803	-333.139	410.588	-332.171	431.081	-327.163	431.337	-312.537	397.258	-332.421
615.54	-333.109	410.584	-331.82	426.805	-325.584	427.629	-312.592	397.27	-332.509
614.958	-332.74	410.404	-331.125	429.081	-330.211	424.183	-313.091	396.959	-332.599
614.402	-332.607	409.713	-329.934	428.496	-335.472	418.92	-315.046	395.791	-332.513
613.715	-332.519	409.234	-328.657	427.495	-340.381	412.504	-315.713	394.186	-332.448
613.731	-332.464	408.651	-328.065	423.627	-339.147	411.317	-313.925	392.408	-332.212
613.532	-332.37	405.984	-328.35	426.697	-342.052	414.829	-313.02	389.19	-331.674
612.804	-332.207	403.757	-328.787	425.259	-342.254	418.697	-314.235	386.08	-331.246
612.17	-331.949	401.896	-328.757	426.031	-343.569	421.121	-314.392	383.121	-331.074
611.378	-331.559	399.283	-328.683	427	-344.533	420.112	-314.577	379.805	-330.291
610.546	-331.344	397.638	-329.543	421.586	-341.572	420.721	-314.674	376.077	-329.29
609.573	-331.026	394.909	-331.319	421.571	-341.314	420.163	-314.7	372.181	-329.285
608.871	-330.852	390.613	-334.573	421.94	-341.52	420.025	-314.716	372.525	-330.883
608.252	-330.753	389.952	-334.673	421.632	-339.976	421.293	-314.834	374.02	-331.905
607.526	-330.547	390.033	-334.772	418.756	-338.187	421.338	-314.807	372.091	-332.053
606.751	-330.304	389.065	-335.236	418.562	-337.8	420.781	-314.719	371.741	-332.222
606.283	-330.174	388.895	-335.05	420.062	-337.713	420.775	-314.934	373.407	-332.332
605.37	-329.786	389.2	-335.125	411.01	-331.971	419.615	-314.904	374.379	-332.296
604.022	-329.12	389.158	-335.405	411.804	-331.706	417.114	-315.21	375.122	-332.276
602.137	-327.936	388.276	-334.986	411.973	-330.727	414.59	-315.565	376.38	-332.291
601.078	-327.361	386.254	-334.254	414.858	-328.284	411.995	-315.877	377.171	-331.706
601.714	-328.454	385.467	-334.319	409.307	-329.307	409.227	-316.253	377.076	-330.324
602.423	-329.352	384.27	-334.286	407.704	-328.475	406.041	-316.585	375.892	-329.289
602.054	-329.404	381.988	-333.89	407.588	-328.472	401.931	-317.285	374.017	-328.471
601.755	-329.491	380.073	-333.351	407.53	-328.052	396.967	-317.729	371.326	-327.542
601.85	-329.521	377.615	-332.478	408.496	-327.893	391.322	-318.278	367.691	-327.135
602.041	-329.452	374.439	-331.596	408.628	-327.25	386.419	-319.983	363.68	-326.921
602.591	-329.367	370.692	-330.621	408.818	-326.976	385.015	-321.112	360.865	-327.456
602.252	-329.446	366.064	-329.94	407.656	-326.472	386.36	-321.693	357.144	-328.353
601.293	-329.306	366.313	-331.217	406.24	-327.394	390.869	-321.2	353.901	-330.847
600.787	-327.802	365.855	-331.752	401.344	-328.013	392.323	-321.284	349.739	-332.106
600.655	-326.681	364.715	-332.142	393.834	-326.083	393.009	-321.402	349.17	-332.148
598.785	-326.465	365.189	-332.051	397.51	-329.142	396.258	-321.391	349.699	-332.228
596.649	-327.617	366.079	-332.204	392.759	-327.038	398.981	-320.481	348.476	-332.44
595.318	-328.221	366.475	-332.071	397.05	-331.557	398.902	-319.43	347.02	-332.538
593.831	-328.645	366.2	-331.115	391.084	-332.778	396.293	-318.083	347.607	-332.477
591.799	-330.008	365.808	-329.645	389.118	-338.3	394.337	-316.599	347.911	-332.662
589.832	-331.88	364.112	-328.728	380.093	-335.488	393.034	-315.705	347.559	-332.8
589.058	-332.267	362.639	-328.561	384.705	-338.863	392.284	-315.147	347.31	-332.807
588.543	-332.352	360.352	-328.828	386.613	-341.311	390.694	-314.504	346.326	-332.8
587.908	-332.448	358.311	-329.152	384.631	-340.88	388.513	-313.527	344.657	-332.657
587.324	-332.404	356.557	-329.255	386.283	-342.332	385.947	-313.102	342.58	-332.525
587.043	-332.359	353.9	-329.8	387.818	-343.327	382.904	-312.924	339.472	-331.931
586.695	-332.402	351.725	-330.297	385.83	-342.323	379.582	-312.964	336.057	-331.471
586.468	-332.474	348.239	-332.873	385.431	-341.902	375.54	-313.869	332.926	-331.296
586.323	-332.402	344.327	-334.982	384.145	-340.477	370.11	-315.942	329.455	-330.468
586.104	-332.31	344.906	-334.982	377.923	-336.239	364.869	-315.567	325.118	-329.387
586.069	-332.412	344.667	-335.165	373.696	-333.704	365.629	-313.927	321.359	-329.479
586.087	-332.378	344.071	-335.478	375.408	-333.784	370.251	-313.654	323.082	-331.533
586.013	-332.35	345.028	-334.995	369.053	-329.52	374.245	-314.741	324.398	-332.156
585.289	-332.292	345.107	-335.33	373.185	-331.055	373.556	-314.176	321.673	-332.371
584.712	-332.034	344.156	-335.586	376.636	-332.079	373.178	-314.91	321.63	-332.587
584.147	-331.922	342.985	-334.99	373.975	-329.911	373.633	-314.959	323.895	-332.699
583.945	-331.869	341.257	-334.868	370.915	-328.493	373.218	-314.946	325.053	-332.649
583.483	-331.79	340.663	-334.948	369.211	-327.674	374.78	-315.22	325.888	-332.62
583.029	-331.56	338.431	-334.551	371.097	-328.886	374.684	-315.25	327.17	-332.578
582.041	-331.324	336.43	-333.812	371.447	-328.912	374.563	-315.275	327.777	-331.585
581.212	-331.012	334.344	-333.144	371.408	-328.459	374.521	-315.245	327.681	-330.279
580.165	-330.702	329.812	-331.673	371.481	-327.813	374.337	-315.302	326.099	-328.924
579.319	-330.39	328.221	-331.667	372.372	-327.694	372.844	-315.32	322.83	-327.708
578.611	-330.088	324.061	-330.414	372.761	-327.5	371.013	-315.674	321.52	-327.438
578.037	-330.008	319.682	-329.961	371.956	-327.389	367.892	-315.758	318.735	-327.017
577.348	-330.025	322.044	-332.661	369.963	-329.221	365.146	-316.314	315.243	-327.147
576.735	-329.75	318.978	-331.525	362.965	-328.181	362.266	-316.609	311.899	-327.519
575.885	-329.286	319.576	-332.242	361.017	-328.531	358.856	-317.133	308.761	-328.763
574.778	-328.652	320.823	-332.696	359.27	-328.419	354.195	-317.915	303.677	-330.8
573.072	-327.562	321.856	-332.63	353.363	-325.726	348.601	-318.504	297.84	-331.734
571.902	-326.646	321.142	-332.021	354.293	-329.319	341.92	-319.722	298.299	-331.96
573.013	-327.959	320.833	-331.17	350.814	-332.969	337.638	-321.161	299.133	-332.093
574.788	-329.318	320.347	-329.95	353.555	-340.718	337.39	-322.303	298.083	-332.446
573.635	-329.118	318.291	-328.526	348.958	-339.125	339.847	-322.492	297.304	-332.791
573.722	-328.932	316.745	-328.638	347.909	-339.291	344.586	-321.841	297.866	-332.804
573.657	-328.757	314.873	-329.277	342.555	-337.518	345.688	-321.953	298.284	-333.022
574.215	-328.659	312.321	-329.705	348.473	-342.055	346.616	-322.204	297.767	-333.125
574.55	-328.672	310.344	-329.84	346.757	-341.157	349.029	-321.86	297.501	-333.098
574.059	-328.667	308.488	-330.233	349.419	-343.01	351.43	-320.787	295.952	-332.876
574.231	-327.545	304.901	-331.354	348.447	-342.586	351.073	-319.73	293.902	-332.713
573.293	-325.956	300.463	-333.762	348.091	-341.873	348.64	-318.189	292.124	-332.559
571.977	-325.456	299.533	-335.191	341.2	-336.418	346.676	-316.811	288.478	-332.058
569.801	-326.045	300	-335.298	342.533	-336.942	345.537	-316.054	284.933	-331.794
567.453	-326.891	298.809	-335.732	341.526	-336.393	344.187	-315.69	282.68	-331.826
566.591	-327.138	298.347	-335.778	342.558	-336.442	342.417	-314.919	279.108	-330.939
565.372	-327.378	298.914	-335.705	339.659	-334.178	339.903	-314.24	274.547	-329.836
564.113	-328.119	298.7	-335.939	335.111	-330.394	336.477	-313.735	271.775	-330.283
562.294	-329.286	298.279	-335.802	334.395	-329.049	333.228	-313.47	273.137	-332.318
559.604	-331.783	295.945	-334.832	332.123	-326.728	329.913	-314.222	273.471	-332.538
559.08	-332.016	295.116	-335.222	331.793	-327.154	325.028	-315.455	271.535	-332.96
558.961	-331.909	293.473	-334.748	330.209	-326.712	318.998	-316.461	272.371	-332.984
558.471	-331.838	291.242	-334.34	329.229	-326.129	317.772	-315.16	274.384	-333.04
558.097	-332.041	289.007	-333.432	330.376	-326.91	322.564	-314.57	275.43	-333.007
557.736	-332.015	287.647	-333.44	330.13	-326.265	327.547	-315.132	276.587	-333.038
557.512	-332.098	284.761	-332.493	334.61	-328.045	328.357	-314.958	277.552	-332.804
557.216	-332.109	282.007	-332.062	335.178	-327.659	326.489	-315.176	277.894	-331.725
556.829	-332.041	277.764	-331.079	335.19	-327.605	326.671	-315.419	277.521	-330.29
556.794	-331.96	274.251	-330.918	332.658	-327.858	326.123	-315.592	275.954	-329.394
556.77	-331.956	275.569	-333.014	329.067	-328.776	327.928	-315.552	273.571	-328.529
556.657	-332.008	274.635	-333.041	323.845	-328.549	328.143	-315.686	270.414	-327.848
556.568	-331.97	274.149	-333.194	323.448	-329.206	328.002	-315.726	266.495	-327.545
555.791	-331.692	274.57	-333.143	321.6	-328.522	327.695	-315.761	262.871	-327.894
555.202	-331.544	275.288	-332.995	321.065	-329.871	327.532	-315.726	259.844	-328.794
554.703	-331.308	274.828	-332.152	312.681	-328.623	327.032	-315.844	255.48	-330.372
554.585	-331.36	274.378	-331.104	308.301	-332.951	324.935	-315.831	250.933	-332.658
554.396	-331.298	273.685	-329.976	313.239	-339.443	321.715	-316.442	249.36	-332.678
553.755	-331.177	271.926	-329.345	308.951	-338.287	318.617	-316.523	250.228	-332.813
552.91	-330.744	269.759	-329.403	303.524	-335.822	315.362	-317.194	249.116	-332.886
551.812	-330.402	267.298	-329.868	310.471	-341.773	312.27	-317.608	247.214	-333.171
550.937	-330.058	264.763	-330.131	307.731	-341.285	308.59	-318.119	247.569	-333.064
550.285	-330.032	263.312	-329.901	307.273	-340.676	303.52	-318.866	247.622	-333.165
549.735	-329.711	259.671	-330.296	309.109	-342.279	297.482	-319.518	247.737	-333.16
549.095	-329.608	256.963	-332.45	307.235	-340.709	291.218	-321.101	247.295	-333.358
548.531	-329.506	252.13	-335.435	307.029	-340.033	288.345	-322.37	247.544	-333.55
548.509	-329.42	252.782	-335.694	304.913	-338.143	288.389	-323.222	246.187	-333.589
547.414	-328.848	250.376	-333.844	305.621	-338.021	292.361	-322.889	244.054	-333.208
545.781	-327.641	251.949	-336.244	303.252	-335.974	295.677	-322.554	241.463	-332.808
544.349	-326.992	252.154	-335.864	300.497	-333.774	295.316	-322.6	237.59	-332.508
544.969	-327.856	252.481	-335.827	301.736	-334.319	297.268	-322.947	234.655	-332.173
545.742	-328.617	251.576	-336.004	298.768	-331.211	300.245	-322.082	231.472	-331.78
544.884	-328.263	251.33	-335.809	295.879	-328.611	302.119	-321.129	227.895	-330.827
544.93	-328.286	249.475	-335.521	295.831	-328.251	300.642	-320.01	223.412	-329.91
544.898	-328.255	248.74	-335.441	294.915	-328.731	298.189	-318.326	219.6	-329.83
545.306	-328.311	246.173	-334.676	295.926	-328.487	296.792	-317.188	221.647	-332.125
545.894	-328.223	244.991	-334.283	292.524	-327.662	295.619	-316.506	221.858	-332.429
546.055	-328.281	242.933	-333.813	292.271	-327.28	294.126	-316.119	220.13	-332.567
545.839	-327.699	240.133	-332.832	292.571	-326.84	292.067	-315.239	219.321	-332.102
545.806	-326.4	237.834	-332.902	296.979	-328.231	289.178	-314.731	221.798	-332.566
544.761	-324.998	234.082	-331.994	296.475	-327.85	286.191	-314.43	223.112	-332.702
543.188	-324.736	229.285	-330.727	296.727	-327.873	282.732	-314.53	223.506	-332.571
540.764	-325.484	229.062	-331.651	293.501	-328.868	278.353	-315.271	225.323	-332.788
538.902	-326.197	229.815	-333.449	288.55	-328.465	272.878	-317.106	225.929	-332.023
538.467	-325.864	227.263	-333.338	283.948	-327.675	268.039	-316.899	225.801	-330.743
537.471	-326.057	228.327	-333.494	281.429	-326.444	269.637	-315.389	223.783	-329.714
536.522	-326.424	228.576	-333.285	283.392	-328.372	275.609	-315.857	220.34	-328.393
534.613	-327.685	228.636	-333.145	281.038	-328.935	279.505	-315.679	217.418	-327.732
532.537	-329.836	227.991	-332.097	278.696	-332.592	277.906	-315.615	214.781	-328.056
530.649	-331.573	227.684	-330.952	272.309	-337.242	276.284	-316.201	211.451	-328.289
530.109	-331.621	226.969	-330.058	274.672	-341.381	276.875	-316.181	208.171	-329.103
529.854	-331.469	224.228	-328.984	271.428	-338.745	276.902	-316.133	204.113	-330.925
529.736	-331.62	222.71	-329.833	269.969	-340.725	278.652	-316.18	198.778	-333.156
529.202	-331.543	219.756	-330.111	265.729	-338.507	278.554	-316.283	196.967	-333.216
529.049	-331.535	216.846	-330.063	269.258	-341.171	278.392	-316.387	197.771	-333.247
528.927	-331.6	214.63	-330.255	266.471	-339.193	278.102	-316.304	196.761	-333.423
528.688	-331.468	211.461	-330.164	268.981	-341.442	277.956	-316.27	194.639	-333.572
528.633	-331.517	209.137	-333.565	267.938	-339.862	276.986	-316.244	195.341	-333.684
528.642	-331.536	204.127	-335.181	266.126	-338.852	275.673	-316.68	195.39	-333.865
528.502	-331.579	205.921	-335.754	268.533	-339.5	273.75	-317.019	195.627	-333.908
528.244	-331.509	205.119	-336.121	267.331	-338.727	270.496	-317.493	195.103	-333.905
527.312	-331.182	204.116	-336.579	264.691	-336.691	267.486	-317.832	195.211	-334.013
526.974	-331.034	204.618	-336.428	260.826	-333.111	264.26	-318.179	193.451	-334.077
526.658	-330.9	204.24	-336.244	264.165	-334.871	259.765	-318.679	191.471	-333.821
526.418	-330.929	204.108	-336.728	260.905	-331.9	253.404	-319.759	188.061	-333.426
526.195	-330.85	202.371	-335.846	258.572	-330.005	246.626	-320.614	183.904	-332.738
525.623	-330.8	200.885	-335.968	254.404	-327.35	240.721	-322.543	181.511	-332.618
524.603	-330.32	199.86	-336.02	255.444	-328.483	238.179	-323.499	178.002	-332.03
523.762	-330.03	197.757	-334.858	254.649	-328.282	239.062	-324.388	174.387	-330.848
523.043	-329.789	195.548	-334.974	252.981	-327.642	244.337	-323.305	169.783	-330.283
522.534	-329.501	193.869	-334.261	254.232	-327.604	248.305	-322.81	167.679	-330.907
522.029	-329.518	190.99	-333.213	254.212	-327.163	249.669	-323.197	169.41	-332.953
521.812	-329.38	187.649	-332.403	256.195	-327.958	249.528	-323.202	169.634	-332.951
521.187	-329.191	183.377	-331.27	256.264	-327.405	251.051	-321.986	167.803	-333.39
520.545	-329.05	178.353	-330.059	256.582	-328.05	252.585	-321.186	168.568	-333.367
520.054	-328.688	180.064	-332.458	251.893	-328.117	252.095	-319.866	171.12	-333.355
519.293	-328.531	179.665	-333.113	246.453	-327.796	249.497	-317.691	171.85	-333.434
518.763	-328.406	179.1	-333.815	243.892	-328.077	248.458	-317.355	172.494	-333.527
518.17	-328.244	179.051	-333.445	242.303	-327.738	247.031	-316.581	173.318	-332.913
518.208	-328.474	179.942	-333.828	240.124	-327.822	245.453	-316.079	173.436	-331.704
517.815	-328.298	179.461	-332.93	242.464	-333.861	242.834	-315.597	172.442	-330.358
517.912	-328.294	179.125	-331.794	237.009	-336.388	239.347	-315.098	170.545	-329.478
518.633	-327.92	178.752	-330.726	237.048	-339.911	236.469	-315.06	168.015	-328.756
519.154	-327.905	177.697	-330.126	234.557	-341.907	233.538	-315.19	164.946	-328.201
519.705	-327.804	175.319	-329.86	233.752	-341.708	228.377	-316.142	161.318	-328.013
519.644	-327.74	172.636	-330.203	230.989	-341.544	222.591	-317.533	156.915	-327.789
519.649	-326.73	169.939	-330.592	230.161	-342.497	220.051	-316.992	154.26	-328.977
520.016	-325.307	167.375	-330.436	229.015	-341.582	223.614	-316.002	149.509	-330.513
518.657	-324.126	166.121	-330.739	229.679	-342.387	230.157	-316.473	143.629	-332.955
516.814	-324.25	162.724	-332.018	227.412	-340.521	230.802	-316.154	143.092	-333.306
514.291	-325.258	158.826	-334.209	229.962	-342.196	227.767	-316.604	144.402	-333.347
512.951	-325.757	155.481	-336.381	228.716	-340.688	227.094	-316.69	143.098	-333.478
512.35	-325.495	156.702	-336.236	226.807	-338.793	227.427	-316.652	141.067	-333.894
511.135	-326.125	157.272	-336.325	226.169	-338.444	228.678	-316.691	141.658	-333.755
509.608	-326.898	156.079	-336.624	224.813	-336.987	229.569	-316.645	141.861	-333.955
507.666	-328.677	156.737	-336.407	226.676	-337.82	230	-316.788	141.981	-334.16
505.075	-331.08	157.014	-336.425	223.535	-334.876	229.848	-316.802	141.504	-334.064
504.718	-331.241	156.996	-335.565	218.776	-330.824	230.07	-316.828	140.188	-333.986
504.552	-331.217	154.185	-335.61	217.209	-328.926	229.98	-316.934	138.548	-333.709
504.298	-331.13	151.326	-335.643	216.375	-329.085	228.576	-316.864	136.601	-333.686
503.753	-331.239	150.568	-335.904	213.612	-328.155	227.612	-317.267	134.07	-333.118
503.508	-331.266	148.236	-335.368	213.677	-327.745	224.754	-317.695	130.007	-332.595
503.405	-331.238	146.183	-334.816	215.181	-328.506	221.425	-317.955	126.456	-332.478
503.141	-331.115	144.209	-333.983	212.895	-326.947	218.207	-318.353	122.777	-331.512
502.979	-331.157	141.4	-333.3	212.164	-325.866	214.113	-318.92	118.333	-330.18
502.938	-331.154	137.873	-332.397	215.259	-327.266	208.481	-319.745	114.125	-330.384
502.941	-331.318	133.97	-331.668	218.721	-328.671	202.218	-320.421	114.94	-332.071
502.87	-331.231	130.598	-331.386	217.834	-329.179	194.61	-321.62	116.713	-333.28
502.284	-330.994	132.156	-333.669	211.128	-328.328	189.539	-323.409	113.963	-333.318
501.752	-330.888	130.564	-333.146	211.165	-331.068	188.419	-324.326	113.189	-333.491
501.064	-330.756	130.359	-333.757	204.082	-329.045	190.015	-324.506	115.771	-333.555
500.984	-330.769	131.06	-333.664	206.72	-331.903	196.749	-323.38	115.483	-332.901
500.848	-330.733	131.873	-333.664	201.679	-331.284	200.688	-323.428	115.957	-332.81
500.568	-330.649	131.118	-332.858	199.638	-335.025	200.612	-323.399	116.552	-332.541
500.062	-330.359	130.318	-331.644	196.5	-339.569	200.15	-323.264	117.823	-332.108
498.941	-330.114	129.924	-330.562	194.231	-341.688	202.069	-322.1	117.021	-330.372
498.173	-329.788	128.628	-329.816	196.375	-344.457	203.404	-320.922	116.003	-329.19
497.407	-329.635	126.415	-329.81	194.324	-344.94	202.487	-319.431	114.809	-328.788
496.931	-329.354	123.569	-330.372	190.038	-342.495	200.3	-318.013	112.329	-328.21
496.683	-329.255	120.74	-330.607	189.903	-343.135	198.089	-317.064	109.278	-327.952
496.37	-329.186	117.991	-330.66	190.743	-343.936	196.522	-316.506	106.146	-328.326
495.618	-328.983	115.203	-331.248	192.786	-345.8	194.887	-316.337	102.749	-328.851
495.114	-328.622	112.165	-333.324	191.058	-344.348	191.776	-315.68	99.2176	-330.067
494.475	-328.475	106.858	-335.542	189.507	-342.388	187.966	-315.176	94.1951	-332.244
494.11	-328.542	107.285	-335.529	186.475	-339.39	184.994	-315.319	89.3411	-333.489
493.68	-328.476	108.294	-335.958	187.232	-339.784	181.603	-315.817	89.2961	-333.418
493.014	-328.276	106.177	-336.107	187.102	-339.679	176.269	-317.098	90.161	-333.676
492.932	-328.203	106.78	-336.342	184.473	-336.807	169.91	-317.877	88.4175	-333.927
492.721	-328.135	106.751	-336.211	185.244	-337.381	169.272	-316.829	87.0047	-333.992
492.477	-328.122	106.928	-336.736	182.941	-334.766	174.647	-316.484	87.6894	-333.959
492.804	-327.86	106.203	-336.116	177.992	-329.651	180.659	-316.697	88.2337	-334.128
493.653	-327.724	104.457	-335.536	176.649	-328.889	179.532	-316.316	87.5642	-334.207
493.897	-327.725	103.856	-335.412	173.483	-327.691	177.577	-317.111	87.5131	-334.254
493.934	-327.61	101.408	-335.479	176.19	-329.84	177.557	-317.151	86.3839	-334.208
494.331	-326.269	97.3026	-332.844	175.579	-329.794	177.346	-317.177	84.1823	-333.994
494.86	-324.589	97.5786	-334.4	174.773	-329.045	179.646	-317.185	81.4793	-333.54
493.145	-323.608	94.1244	-332.491	172.869	-327.371	179.023	-317.141	77.9	-333.1
491.079	-324.04	92.032	-332.915	176.207	-328.479	179.484	-317.558	74.8342	-332.83
488.551	-325.085	88.2469	-331.488	172.944	-326.577	179.267	-317.433	71.7188	-332.534
487.334	-325.546	83.655	-331.096	174.493	-326.879	179.087	-317.398	68.0362	-331.446
486.996	-325.345	84.1795	-333.046	174.144	-328.634	178.452	-317.489	62.9227	-330.375
485.721	-325.787	84.1827	-333.439	172.257	-329.921	176.688	-317.514	60.0769	-331.098
484.428	-326.456	82.4885	-333.777	166.579	-329.763	173.989	-317.62	61.2243	-333.186
482.549	-328.084	83.2471	-333.738	162.426	-327.367	171.109	-318.101	61.6672	-333.455
479.719	-330.876	83.3134	-333.8	164.514	-332.1	167.7	-318.359	59.0084	-333.935
479.182	-330.907	84.1197	-333.518	162.548	-334.933	164.619	-318.87	59.9185	-333.998
479.038	-330.876	83.6088	-332.568	160.816	-338.869	159.872	-319.598	62.02	-334.008
478.874	-330.891	83.1791	-331.307	160.349	-343.613	153.854	-320.205	62.8195	-333.972
478.338	-331.019	82.2758	-330.203	153.674	-342.72	146.583	-321.033	64.2898	-333.995
478.234	-330.863	80.3822	-329.671	154.238	-343.919	139.14	-322.779	66.0196	-333.922
478.159	-330.817	77.8647	-329.915	152.446	-342.162	135.396	-324.237	66.3536	-332.886
477.897	-330.832	74.7687	-329.988	150.36	-342.2	134.392	-325.557	65.6046	-331.276
477.701	-330.924	72.1489	-330.564	152.249	-345.849	137.926	-324.948	64.1236	-330.115
477.65	-330.892	69.9639	-330.959	151.924	-345.505	144.827	-323.816	62.3386	-329.287
477.52	-330.907	67.6641	-331.585	154.006	-346.375	147.309	-323.978	59.9358	-328.622
477.431	-330.926	63.7167	-333.583	151.903	-345.782	146.218	-323.829	56.2317	-328.167
476.972	-330.755	58.3664	-335.469	149.317	-343.156	147.059	-323.419	52.7152	-328.279
476.52	-330.695	60.3643	-336.011	146.441	-340.435	149.517	-321.959	49.3247	-328.906
476.123	-330.465	59.7124	-336.119	148.5	-341.925	150.251	-320.703	45.513	-330.082
475.914	-330.57	58.5226	-336.548	146.561	-340.028	148.323	-319.241	40.1462	-332.46
475.648	-330.375	59.2775	-336.353	146.324	-339.253	145.532	-317.805	35.2286	-333.683
475.408	-330.347	59.0721	-336.479	143.656	-336.834	143.948	-317.212	35.6446	-333.665
474.812	-330.269	58.7377	-336.587	143.101	-335.748	142.466	-317.037	36.8643	-333.782
473.706	-329.824			139.009	-331.749	140.049	-316.595	34.6415	-334.034
472.991	-329.501			138.09	-329.959	136.554	-315.965	33.097	-334.097
472.103	-329.28			132.569	-328.585	133.356	-315.751	33.909	-334.106
471.681	-329.342			134.931	-329.949	130.664	-315.619	34.397	-334.262
471.559	-329.038			134.128	-329.783	127.139	-316.354
470.802	-328.812			133.923	-329.792	121.471	-317.902
470.034	-328.517			133.536	-329.05	115.909	-318.07
468.751	-327.467			132.164	-327.318	116.713	-317.128
466.696	-326.242			133.221	-327.721	123.175	-317.37
466.969	-326.729			132.883	-327.914	127.362	-317.15
468.06	-327.802			134.105	-330.699	125.188	-317.074
467.723	-327.793			128.908	-329.996	123.335	-317.572
467.147	-327.756			127.411	-331.582	123.439	-317.693
467.359	-327.729			126.993	-332.58	123.622	-317.533
466.929	-327.723			126.005	-333.984	125.735	-317.768
467.29	-327.576			123.362	-336.303	125.941	-317.809
467.724	-327.464			118.276	-340.721	126.051	-317.899
468.073	-327.427			113.472	-342.307	125.271	-317.845
468.069	-327.19			113.346	-342.473	124.634	-317.723
468.02	-325.952			112.653	-343.694	122.595	-317.723
468.346	-324.693			108.6	-342.378	119.568	-317.935
466.982	-324.008			113.862	-345.443	116.761	-318.145
464.521	-324.305			111.244	-346.152	113.612	-318.284
462.433	-325.21			111.127	-345.876	109.698	-318.673
461.569	-325.424			112.651	-345.015	106.167	-319.433
460.568	-325.543			111.829	-345.397	100.522	-320.093
459.326	-326.384			108.78	-343.407	93.797	-321.02
457.741	-327.457			109.514	-342.686	86.2943	-322.279
455.252	-329.835			104.303	-338.989	81.075	-323.964
454.026	-330.904			106.277	-340.277	78.391	-324.969
453.692	-330.747			101.279	-335.625	79.4492	-325.512
453.565	-330.675			105.644	-339.185	85.9507	-324.49
452.893	-330.849			99.9325	-334.183	89.4632	-324.361
452.727	-330.92			97.3702	-331.353	89.6644	-324.554
452.815	-330.787			96.1732	-330.924	90.1104	-324.713
452.53	-330.852			96.1538	-331.978	92.1216	-323.229
452.203	-330.888			94.696	-330.852	93.9126	-322.213
452.208	-330.852			94.5567	-331.146	92.6426	-320.585
452.125	-330.852			95.6911	-330.768	90.4773	-319.102
451.975	-330.901			94.9752	-329.977	88.962	-318.301
452.021	-330.917			95.7735	-329.912	87.678	-317.762
451.409	-330.698			96.2629	-330.202	85.6374	-317.173
450.853	-330.497			95.6652	-330.235	82.4227	-316.477
450.488	-330.606			92.763	-331.515	79.1095	-316.054
450.546	-330.552			91.3395	-333.293	76.0436	-315.856
450.192	-330.336			88.3422	-333.2	72.2949	-316.258
449.754	-330.213			85.4091	-332.364	67.4043	-317.471
448.783	-329.922			84.305	-333.985	60.8645	-318.703
447.875	-329.483			80.1857	-335.095	59.4909	-317.736
447.049	-329.306			79.4	-342.394	65.1805	-317.102
446.563	-329.3			75.4029	-345.565	72.4894	-317.523
446.356	-329.168			77.1088	-347.102	72.2054	-317.324
445.906	-329.005			75.1018	-348.484	69.6015	-317.67
445.237	-328.61			72.1314	-346.726	69.0421	-317.814
444.217	-327.979			73.3556	-344.083	68.6189	-317.749
442.343	-326.486			73.6418	-345.451	70.3188	-317.865
440.975	-325.749			71.1333	-345.776	71.4789	-317.888
441.47	-326.926			70.3333	-345.444	71.1008	-318.02
442.571	-327.744			70.56	-345.44	70.9333	-318.077
442.026	-327.63			68.4464	-341.786	70.6307	-317.994
441.79	-327.739			68	-342.478	69.6982	-317.997
441.871	-327.704			65.7212	-341.606	68.0457	-318.1
441.62	-327.628			67.1	-339.715	64.643	-318.076
441.899	-327.684			62.6769	-337.887	61.8086	-318.427
442.324	-327.614			60.8589	-336.509	58.3423	-318.714
442.571	-327.454			57.4063	-333.229	54.9265	-319.129
442.324	-326.882			57.675	-332.988	50.5366	-319.898
442.567	-325.698			55.8887	-332.219	44.3165	-320.645
442.869	-324.319			54.697	-332.277	36.9491	-321.52
441.522	-323.895			53.8192	-331.754	29.3695	-323.27
438.74	-324.476			52.3352	-330.693	24.502	-324.852
436.941	-325.166			53.4301	-330.605	22.6052	-326.256
436.355	-325.111			52.6656	-329.452	26.0059	-325.516
435.572	-325.182			55.7967	-330.087	32.9926	-324.68
434.364	-325.806			53.1614	-329.211
432.863	-326.764			49.7621	-329.503
430.563	-328.986			48.9357	-331.589
428.662	-330.683			44.9071	-331.871
428.121	-330.706			46.4043	-335.286
428.211	-330.541			45.7687	-336.549
427.813	-330.778			43.1802	-336.889
427.382	-330.824			39.8486	-340.141
427.323	-330.648			34.5351	-344.184
427.238	-330.695			34.3164	-346.621
427.03	-330.727			35.538	-346.361
427.005	-330.631			32.8056	-349.696
426.935	-330.687			32.2286	-348.703
426.786	-330.718			36.9352	-347.854
426.775	-330.702			32.8194	-348.432
426.008	-330.498
425.772	-330.517
425.395	-330.385
425.374	-330.277
424.958	-330.213
424.572	-330.184
423.773	-329.941
422.763	-329.542
421.922	-329.095
421.217	-328.924
421.255	-329.105
420.527	-329.022
420.096	-328.698
419.147	-328.234
417.488	-326.858
415.835	-325.623
416.046	-326.11
417.3	-327.628
416.878	-327.735
416.563	-327.589
416.718	-327.667
416.593	-327.641
417.109	-327.547
417.383	-327.402
417.05	-327.342
417.148	-326.168
417.968	-324.746
417.263	-323.948
415.64	-323.996
412.435	-324.783
410.788	-325.779
409.832	-325.996
408.363	-326.952
406.668	-328.355
404.101	-330.499
403.656	-330.744
402.96	-330.435
402.808	-330.486
402.636	-330.908
402.442	-330.828
402.392	-330.806
401.931	-330.676
402.017	-330.819
402.036	-330.711
401.977	-330.722
401.929	-330.72
401.967	-330.829
401.309	-330.762
400.33	-330.195
400.396	-330.503
400.349	-330.55
400.085	-330.431
399.938	-330.32
399.188	-330.156
398.33	-329.713
397.495	-329.369
396.648	-329.139
396.369	-329.19
395.933	-329.016
395.418	-328.896
394.705	-328.616
393.885	-327.944
391.998	-326.655
391.32	-326.281
391.971	-327.301
392.583	-327.963
391.9	-327.668
391.837	-327.724
391.571	-327.72
391.574	-327.642
392.181	-327.481
392.426	-327.422
392.157	-327.219
392.245	-325.991
393.05	-324.378
392.227	-323.782
390.233	-324.204
387.514	-325.41
386.159	-325.944
385.129	-326.279
383.103	-327.805
380.747	-330.004
379.222	-330.448
379.103	-330.674
378.927	-330.716
378.33	-330.847
377.143	-330.473
377.882	-330.893
377.615	-330.971
377.452	-331.036
377.392	-330.937
376.777	-330.709
376.983	-330.786
377.106	-330.824
376.725	-330.907
376.444	-330.827
375.883	-330.73
375.639	-330.566
375.371	-330.519
375.109	-330.491
374.85	-330.373
374.092	-330.157
373.196	-329.758
372.5	-329.484
371.838	-329.351
371.219	-329.238
370.775	-329.012
370.119	-328.896
369.504	-328.575
368.372	-327.928
366.594	-326.758
366.582	-326.919
367.423	-328.062
367.322	-328.029
366.779	-327.852
366.857	-328.023
366.646	-327.797
366.789	-327.991
367.4	-327.75
367.482	-327.698
367.39	-327.131
367.915	-325.609
368.261	-324.185
367.033	-323.755
364.809	-324.583
362.182	-326
361.021	-326.495
359.357	-327.469
356.929	-329.553
355.384	-330.934
354.729	-331.076
354.39	-331.11
354.039	-331.125
353.458	-331.115
353.357	-331.072
353.073	-331.102
352.891	-331.189
352.7	-331.167
352.655	-331.209
352.549	-331.148
352.51	-331.183
352.566	-331.176
352.432	-331.121
351.939	-331.129
351.299	-331.093
350.712	-330.978
350.687	-331.033
350.521	-331.061
349.816	-330.83
349.141	-330.578
348.322	-330.23
347.488	-329.982
346.978	-329.722
346.472	-329.467
345.761	-329.514
344.977	-329.242
344.25	-328.703
342.601	-327.564
342.137	-327.374
342.698	-328.356
342.875	-328.604
342.391	-328.359
342.395	-328.433
342.029	-328.527
342.142	-328.546
342.641	-328.393
343.136	-328.095
343.211	-327.904
343.333	-326.826
344.043	-325.341
344.215	-323.801
342.583	-323.934
339.917	-325.211
337.57	-326.421
336.619	-327.038
334.792	-328.318
331.975	-330.777
330.432	-331.549
329.968	-331.703
329.614	-331.699
329.231	-331.844
328.816	-331.814
328.366	-331.912
328.333	-331.918
328.128	-331.895
327.965	-331.983
327.899	-331.917
327.915	-331.869
327.89	-331.921
327.856	-331.832
327.372	-331.895
326.683	-331.813
326.458	-331.824
326.268	-331.941
326.327	-331.934
325.604	-331.571
325.133	-331.287
324.398	-331.236
323.485	-330.85
322.579	-330.551
321.517	-329.985
320.855	-329.787
320.251	-329.591
319.823	-329.44
318.927	-328.984
318.062	-328.041
316.592	-327.315
316.857	-328.054
317.509	-328.613
316.959	-328.579
316.824	-328.65
316.674	-328.628
316.735	-328.651
317.438	-328.524
317.797	-328.329
317.709	-328.178
318.028	-326.912
318.641	-325.503
318.135	-324.815
316.229	-324.884
313.434	-326.113
312.352	-326.783
311.561	-326.873
309.644	-327.98
307.479	-330.241
304.852	-331.891
304.101	-331.845
304.175	-331.942
303.385	-331.738
303.509	-332.104
302.978	-332.128
302.466	-331.817
302.752	-332.018
302.553	-332.153
302.601	-332.043
302.615	-332.129
302.443	-332.124
302.464	-332.216
302.026	-332.101
301.27	-331.986
300.896	-332.027
300.753	-332.035
300.66	-331.968
300.575	-332.01
299.835	-331.876
299.177	-331.512
297.937	-331.022
297.107	-330.842
296.333	-330.385
295.498	-330.039
295.148	-329.993
294.559	-329.794
293.848	-329.491
292.611	-328.693
290.791	-327.333
290.43	-327.276
291.367	-328.638
291.589	-328.8
290.734	-328.63
291.017	-328.756
290.733	-328.684
290.858	-328.624
291.387	-328.563
291.635	-328.508
291.269	-327.803
291.831	-326.473
291.976	-325.15
290.749	-324.898
288.32	-325.8
285.597	-327.074
284.808	-327.476
282.944	-328.792
280.513	-330.847
278.732	-332.139
278.087	-332.236
277.776	-332.089
277.447	-332.405
276.35	-332.067
276.852	-332.395
276.372	-332.21
276.177	-332.357
276.279	-332.521
276.356	-332.388
276.254	-332.445
276.211	-332.5
275.942	-332.508
275.499	-332.385
274.925	-332.24
274.675	-332.268
274.305	-332.211
274.343	-332.216
274.073	-332.338
273.346	-332.13
272.301	-331.614
271.575	-331.481
270.629	-330.895
269.741	-330.434
269.28	-330.572
268.723	-330.452
268.287	-330.128
267.61	-329.843
266.189	-328.709
264.473	-327.721
263.987	-327.614
264.919	-328.748
264.931	-328.808
264.459	-328.892
264.836	-328.973
264.592	-328.911
264.938	-328.872
265.546	-328.765
265.34	-328.71
265.189	-327.848
265.799	-326.318
265.358	-325.498
263.879	-325.585
261.539	-326.477
259.879	-327.11
259.058	-327.432
257.202	-328.7
254.78	-330.776
252.601	-332.5
251.95	-332.754
251.931	-332.626
251.549	-332.733
251.093	-332.897
250.781	-332.781
250.869	-332.79
250.681	-332.793
250.483	-332.819
250.534	-332.884
250.442	-332.865
250.421	-332.928
250.194	-332.929
249.404	-332.667
248.991	-332.621
248.655	-332.684
248.543	-332.497
248.666	-332.575
247.946	-332.535
247.147	-332.173
246.622	-332.05
245.397	-331.639
244.519	-331.164
243.635	-330.919
243.032	-330.677
242.691	-330.519
242.124	-330.295
241.175	-329.837
239.876	-328.899
238.497	-328.161
238.734	-328.82
239.322	-329.45
238.933	-329.533
238.819	-329.506
238.68	-329.402
238.751	-329.348
239.427	-329.312
239.846	-329.192
239.594	-328.857
240.078	-327.505
241.076	-325.671
240.47	-325.179
237.865	-325.942
234.611	-327.456
233.561	-328.297
231.698	-329.54
228.671	-331.85
227.436	-332.764
226.78	-332.848
226.523	-332.824
226.123	-332.908
225.656	-332.951
225.314	-333.039
225.194	-332.971
224.968	-333.083
224.822	-333.083
224.711	-333.128
224.756	-332.992
224.722	-333.036
224.639	-333.103
224.385	-333.138
223.523	-332.943
223.166	-332.856
222.857	-332.854
222.949	-332.977
222.682	-332.984
221.564	-332.519
221.279	-332.579
220.47	-332.296
219.958	-331.499
218.763	-331.235
217.778	-330.989
217.124	-330.949
216.74	-330.577
216.093	-330.436
215.102	-329.77
213.528	-328.942
212.557	-328.277
213.047	-329.273
213.559	-329.864
212.958	-329.725
213.047	-329.64
212.782	-329.572
212.767	-329.526
213.146	-329.568
213.596	-329.309
213.74	-328.616
214.259	-327.106
214.067	-326.581
212.672	-326.346
210.386	-327.117
208.352	-328.105
206.7	-328.635
205.374	-329.528
203.191	-331.243
200.686	-333.218
200.085	-333.29
199.874	-333.362
199.615	-333.424
199.164	-333.453
198.835	-333.584
198.894	-333.523
198.568	-333.555
198.356	-333.521
198.468	-333.568
198.365	-333.559
198.241	-333.562
198.162	-333.626
197.82	-333.597
197.093	-333.408
196.451	-333.219
196.198	-333.345
196.092	-333.342
196.104	-333.369
195.326	-333.177
194.425	-333.031
193.296	-332.575
192.363	-332.015
191.018	-331.14
190.537	-330.86
190.192	-331.075
189.542	-330.984
188.832	-330.509
188.124	-330.16
186.619	-329.187
185.725	-328.467
186.084	-329.328
186.641	-330.067
185.696	-329.735
185.916	-329.855
185.829	-329.779
186.299	-329.893
186.671	-329.799
186.507	-329.817
186.295	-329.057
186.933	-327.506
187.03	-326.617
185.37	-326.635
182.861	-327.69
180.948	-328.512
180.022	-328.848
177.584	-330.259
175.006	-332.757
173.704	-333.597
173.233	-333.66
172.942	-333.62
172.45	-333.831
172.185	-333.726
171.688	-333.95
171.69	-333.923
171.468	-333.927
171.399	-334.014
171.413	-334.014
171.315	-333.966
171.301	-334.025
171.215	-333.897
170.64	-333.827
169.922	-333.737
169.442	-333.852
169.185	-333.732
169.417	-333.672
168.933	-333.885
168.129	-333.552
166.989	-333.182
165.906	-332.751
164.671	-332.077
163.803	-331.299
163.243	-331.407
162.801	-331.267
162.254	-330.912
161.435	-330.437
159.833	-329.535
158.755	-328.944
159.199	-329.768
159.749	-330.574
159.345	-330.424
158.974	-330.545
159.148	-330.477
159.2	-330.434
159.721	-330.352
160.154	-330.17
159.975	-329.996
160.007	-328.906
160.752	-327.433
160.264	-326.715
158.132	-327.289
155.501	-328.388
154.01	-329.06
152.539	-329.878
149.994	-331.843
147.252	-333.849
146.643	-334.044
146.724	-333.906
146.359	-334.044
145.792	-334.157
145.526	-334.214
145.426	-334.222
145.26	-334.265
145.046	-334.311
145.052	-334.278
145.103	-334.341
145.028	-334.247
144.932	-334.368
144.756	-334.365
143.993	-334.142
143.217	-334.029
142.894	-334.105
142.654	-334.118
142.7	-334.072
142.347	-334.07
141.552	-333.836
140.394	-333.262
139.514	-332.996
138.502	-332.482
137.696	-332.076
137.186	-331.957
136.578	-331.714
135.645	-331.519
135.087	-330.993
133.675	-330.004
132.52	-329.282
132.977	-330.193
133.439	-330.781
132.884	-330.704
132.784	-330.621
132.686	-330.599
132.799	-330.593
133.1	-330.579
133.607	-330.541
133.092	-330.378
133.083	-329.27
133.535	-328.094
132.899	-327.486
131.679	-327.27
129.446	-328.057
127.768	-328.902
126.788	-329.297
124.581	-330.683
122.113	-333.144
120.345	-334.409
119.689	-334.385
119.707	-334.301
119.152	-334.567
118.845	-334.59
118.704	-334.582
118.605	-334.538
118.524	-334.517
118.428	-334.501
118.437	-334.537
118.351	-334.515
118.132	-334.694
117.821	-334.647
117.131	-334.391
116.365	-334.355
116.164	-334.306
116.031	-334.287
115.855	-334.417
115.165	-334.34
114.282	-334.056
113.233	-333.703
112.15	-333.2
111.157	-332.578
110.632	-332.417
110.163	-332.355
109.424	-332.115
108.816	-331.854
107.758	-331.136
105.706	-329.851
105.141	-329.579
106.033	-330.608
106.528	-331.252
105.744	-331.165
105.681	-331.197
105.577	-331.133
105.849	-330.984
106.509	-330.791
106.376	-330.932
106.148	-330.531
106.688	-328.953
107.216	-327.614
106.382	-327.308
104.24	-327.847
101.67	-328.928
100.82	-329.37
98.9942	-330.483
96.6799	-332.291
93.7004	-334.596
93.05	-334.927
93.0377	-334.791
92.8669	-334.787
92.3267	-334.919
92.0527	-334.951
92.0417	-334.878
91.7839	-334.972
91.6674	-335.029
91.7333	-335.009
91.7845	-334.954
91.7226	-335.023
91.5903	-335.115
91.091	-335.063
90.3157	-334.831
89.9188	-334.917
89.1986	-334.878
89.0895	-334.959
89.0707	-334.955
88.2218	-334.831
87.1958	-334.601
86.1143	-334.144
85.1801	-333.467
84.0079	-332.543
83.2858	-332.453
82.8564	-332.554
82.2169	-332.105
81.1963	-331.482
79.6828	-330.638
79.0013	-330.245
79.2532	-331.071
80.1256	-331.763
79.3416	-331.686
79.0527	-331.529
79.228	-331.578
79.1771	-331.592
79.0214	-331.423
79.934	-331.502
79.8019	-331.448
80.2654	-330.432
81.2288	-328.461
81.76	-327.269
80.121	-327.597
76.8937	-328.916
74.6547	-330.16
73.1062	-330.994
70.6389	-332.947
67.7628	-335.085
67.0784	-335.377
66.9143	-335.302
66.718	-335.319
66.121	-335.507
65.8459	-335.539
65.8383	-335.514
65.6281	-335.62
65.3662	-335.641
65.3747	-335.581
65.4397	-335.656
65.445	-335.579
65.369	-335.612
65.08	-335.726
64.6248	-335.597
63.8142	-335.479
63.2632	-335.423
63.1692	-335.537
63.1007	-335.595
62.323	-335.378
61.6987	-335.181
60.6689	-335.011
59.6595	-334.5
58.6785	-333.866
57.8286	-333.255
57.106	-333.349
56.6487	-333.221
55.9514	-332.954
55.0151	-332.187
53.5483	-331.387
52.7279	-330.993
53.1976	-332.126
53.572	-332.338
52.9025	-332.195
52.9049	-332.22
52.5503	-332.164
52.5106	-332.232
52.8404	-332.315
53.5034	-332.086
53.2724	-331.867
53.7471	-330.467
54.6407	-328.786
54.3597	-328.143
52.7882	-328.372
50.1329	-329.604
48.1269	-330.646
46.7289	-331.439
44.3661	-333.111
41.0984	-335.643
40.1457	-336.093
40.1067	-336.072
40.0959	-336.07
39.288	-336.205
39.0653	-336.259
39.209	-336.093
38.9624	-336.195
38.6987	-336.255
38.7512	-336.294
38.6882	-336.248
38.6374	-336.237
38.5096	-336.232
38.3759	-336.371
37.5532	-336.124
36.8868	-336.039
36.3192	-335.995
36.2557	-336.109
36.1935	-336.212
35.6261	-336.069
34.5241	-335.744
33.3824	-335.252
32.355	-334.722
30.9896	-333.783
30.1767	-333.389
29.7745	-333.257
29.0535	-332.928
27.8133	-332.168
25.8571	-331.18
25.6772	-331.08
26.0873	-331.758
26.5696	-332.533
26.6524	-333.012
26.143	-333.073
25.8864	-333.027
25.836	-333.024
25.8852	-332.995
26.1775	-332.972
26.7586	-332.902

## Sheet: Sheet2
95A / 75D	95A / 75D	85A / 75D	85A / 75D	Vertical	Vertical	Wide	Wide	85A / 95A	85A / 95A
672.246	36.8902	684.513	40.8803	666.011	26.6057	663.379	51.1252	678.221	30.8276
672.5	36.9594	684.549	40.9925	664.627	27.027	663.395	51.0234	676.6	30.937
672.269	36.9397	683.443	41.1522	665.812	26.7125	663.366	51.0862	673.793	31.5552
672.45	37.1835	682.469	40.9773	662.262	27.9034	663.339	51.05	669.563	32.8589
672.4	37.3476	681.29	40.6701	661.058	28.2452	663.369	51.0523	664.864	33.2134
671.937	37.4386	679.647	40.1805	663.217	27.6667	663.277	51.0084	665.143	32.3038
670.555	37.3175	677.106	40.1	665	27.0182	663.305	51.0473	667.435	30.113
669.839	37.2818	676.99	39.2282	661.15	27.95	663.161	51.1929	666.089	30.4657
669.911	37.6074	676.149	38.508	662.724	27.6	662.085	51.7628	664.765	29.808
670.815	37.5737	675.233	37.8389	663.82	26.7	659.886	52.2588	666.979	29.9433
671.359	37.4474	676.079	36.937	664.995	25.6923	656.825	51.9714	668.606	29.7446
671.94	37.0731	674.67	37.2676	660.418	26.0727	651.576	50.8207	669.664	29.9319
670.441	37.2912	677.026	37.0684	658.99	25.9524	643.642	49.1104	671.846	29.5769
669.964	37.4443	676.658	37.2644	663.297	23.7212	639.24	50.9953	672.607	30.86
670.584	37.4985	676.987	38.139	655.708	25.7405	639.009	53.2431	672.305	32.0619
670.977	37.6594	676.469	39.4314	655.249	24.8293	638.705	53.0787	669.881	34.1117
671.872	37.3464	675.063	40.3857	652.245	24.7097	638.981	52.157	667.57	34.6815
671.769	37.1094	673.251	40.8521	655.566	22.48	642.642	50.9701	665.044	35.4364
670.287	37.3916	671.394	40.3387	656.4	21.3333	647.546	48.7206	662.319	35.8909
671.18	37.1057	669.714	40.1343	651.412	23.6235	650.833	49.1639	659.91	36.4476
671.791	37.15	668.349	40.4014	655.981	21.0476	652.787	49.0017	656.628	35.9349
671.472	37.2582	667.194	40.329	642.968	27.9789	650.85	48.7823	653.129	34.9522
671.404	37.4007	664.651	39.1896	649.655	24.0276	648.266	48.6	648.841	33.5339
670.305	37.5338	657.235	37.8579	651.36	23.6267	646.568	48.1548	644.744	30.8172
670.458	37.2786	658.133	34.9737	649.911	24.4667	643.107	47.9	642.589	30.8809
670.171	37.4912	655.987	35.58	652.283	24.3333	637.83	47.0944	643.185	30.6133
670.451	37.5543	654.518	35.2529	654.166	23.7103	631.516	46.6844	642.771	30.5301
670.757	37.3943	654.603	35.1862	643.461	28.2435	626.942	45.9259	641.484	30.314
671.07	37.3696	651.287	35.7203	645.338	28.375	619.743	44.1457	641.756	30.339
670.403	37.3503	649.594	36.0394	646.58	28.8706	617.961	43.035	642.01	30.3967
670.491	37.2366	654.11	34.8379	644.723	31.4692	619.879	42.4028	641.877	30.1766
671.383	37.0099	654.237	35.2408	639.074	35.1649	623.827	42.9447	640.804	30.2248
671.806	36.9958	651.406	36.0562	637.84	36.416	630.641	43.7477	638.626	30.5774
671.701	37.1573	651.794	35.7882	635.939	36.35	633.193	44.6679	637.05	30.7429
671.517	37.0194	650.544	35.9984	633.342	36.8354	629.736	45.7355	635.394	30.7728
671.132	37.0425	647.6	36.6403	633.578	37.0904	627.068	47.0215	632.2	31.1149
670.992	37.0096	642.828	37.9611	634.975	36.9239	625.682	48.1475	628.602	31.686
670.717	37.2062	640.963	38.5519	625.242	40.4052	624.329	49.3168	625.041	32.2444
670.982	37.1881	636.094	39.5156	632.914	38.6078	622.676	50.3227	620.27	33.7965
671.686	37.1428	632.27	40.375	633.205	38.5783	621.061	51.1617	616.285	33.9497
671.133	37.1881	633.63	38.4468	631.34	38.3584	620.871	51.3757	616.759	32.0762
671.178	36.9844	632.443	37.8181	623.735	38.935	618.573	52.1153	617.976	30.9206
671.063	37.1767	631.605	37.2707	627.931	35.4621	614.429	52.0252	615.859	30.8568
670.844	37.3192	631.908	37.1578	622.3	35.7231	610.113	51.4	615.734	30.7671
670.979	37.2034	632.461	37.0718	625.717	33.3793	605.193	49.8579	617.762	30.6071
671.866	36.9849	633.403	36.9933	623.973	31.9911	598.173	49.4119	618.861	30.5489
671.101	37.1953	633.091	37.9208	623.445	28.5224	596.238	51.3305	620.271	30.2615
671.073	36.9883	632.894	39.4273	621.888	24.0125	596.945	52.597	622.093	30.397
671.427	36.9595	632.535	40.365	620.433	23	598.666	51.8504	623.002	30.9984
671.329	37.1497	630.837	40.9737	612.69	25.3793	603.266	50.2	622.417	32.725
671.128	37.2302	628.24	41.132	613.624	24.3515	606.39	50.1839	621.513	34.1522
670.724	37.1693	622.351	41.3595	615.614	22.3034	605.765	49.9438	619.471	34.9167
671.608	36.8531	624.551	40.5146	609.9	24.42	605.681	49.842	617.13	36.0696
670.752	37.0413	621.915	40.8746	603.771	27.2762	605.584	49.819	615.064	36.383
671.237	37.0158	619.694	40.6221	607.353	25.8471	606.882	49.5344	612.137	36.3544
670.616	37.2013	618.464	38.796	603.978	27.4	607.471	49.5008	608.696	36.3571
671.325	36.9662	614.829	35.9176	608.448	24.832	607.095	49.6426	605.125	35.8505
671.339	36.8871	613.419	35.3194	604.428	27.8698	607.203	49.494	601.879	34.8697
671.406	36.8019	613.387	35.2097	606.671	26.9548	605.932	49.5	597.92	32.4305
671.515	36.9329	612.817	34.5833	604.069	28.8229	603.689	49.2413	593.762	31.4942
671.163	37.0854	607.589	35.7526	607.14	27.93	601.02	49.2361	593.736	31.4313
671.179	37.0272	611.733	35.0833	604.195	29.5349	599	48.7735	594.2	31.0472
671.344	36.968	612.395	34.7658	606.015	30.7704	596.64	48.6726	593.289	31.073
671.675	36.7323	610.286	35.5091	594.427	36.4274	593.325	48.2725	592.368	30.9507
671.69	36.7348	606.083	36.4951	597.605	35.8216	589.206	47.5571	592.847	30.9858
671.66	36.785	606.222	36.2676	597.721	35.6105	584.372	47.0056	592.908	30.834
671.631	36.8948	604.319	36.8687	589.543	38.7667	578.645	46.2816	592.714	30.6726
671.625	36.8089	605.369	36.5648	595.045	37.0182	574.557	45.0271	591.512	30.8576
671.684	36.7912	601.435	37.32	590.334	39.038	575.125	43.9573	589.47	31.0867
671.645	36.8073	598.918	37.9329	594.694	37.9392	578.318	43.7219	587.928	31.1657
671.654	36.8226	596.36	38.8481	589.6	40.4465	579.854	43.9869	585.476	31.6531
671.723	36.951	591.459	39.9451	597.19	38.3377	578.303	43.6216	581.993	32.0147
671.742	36.9333	587.81	40.222	595.835	38.83	581.502	43.4741	578.209	32.4708
671.718	36.8944	588.933	37.8699	592.532	38.2474	586.466	43.8245	574.606	33.1211
671.624	36.8552	587.609	37.9565	592.483	36.213	588.312	44.6699	569.816	34.4892
671.653	36.8353	586.686	37.5227	588.552	35.5873	586.79	45.7268	567.036	34.1342
671.702	36.747	587.205	37.3914	587.453	35.4667	584.234	47.0469	568.746	31.6335
671.703	36.7658	587.635	37.37	586.421	34.414	582.957	48.2918	568.536	31.8641
671.688	36.7987	587.047	37.8358	585.496	31.592	581.703	49.2267	565.608	31.619
671.649	36.7973	587.465	38.9652	579.906	29.1608	579.655	50.1477	566.562	31.6174
671.615	36.8	585.305	40.6619	582.39	23.64	578.981	50.8581	568.397	31.2958
670.992	37.1474	584.649	41.5047	577.9	24.32	577.893	51.36	569.767	31.1821
671.297	36.9752	584.811	41.6	578.39	22.8381	575.119	51.6101	571.666	30.9881
671.338	36.9545	581.925	41.5376	581.019	20.7097	570.852	51.9481	572.919	31.1972
671.665	36.9082	581.448	40.792	574.426	22.8387	567.288	51.4764	573.673	32.262
671.354	37.0676	577.705	41.3952	574.335	22.6065	562.176	50.4369	573.189	33.9603
671.317	37.0656	575.551	41.0756	569.886	24.4229	555.228	49.0865	571.646	35.0382
671.738	36.8714	575.58	40.2291	570.558	23.9895	552.309	50.3785	569.337	35.9193
671.754	36.8712	571.795	38.0676	573.503	23.0811	554.17	51.6879	567.884	36.7344
671.673	36.8342	568.554	35.4771	572.789	24.3886	557.763	51.2948	564.953	36.8275
671.09	36.9331	568.515	35.2758	573.426	25.1217	560.726	50.1677	561.292	37.054
671.504	36.8123	567.681	35.2449	567.635	27.8235	561.191	50.1692	557.755	37.152
671.223	37.0026	567.668	35.0532	570.263	27.3659	561.382	49.8634	554.346	36.4429
670.996	37.0006	568.056	34.8778	570.752	27.5905	560.771	49.9285	551.554	34.7739
670.957	37.0342	568.308	34.8641	569.621	29.3241	560.836	49.7364	547.097	31.9882
670.918	37.0459	568.273	34.9076	563.595	33.1945	561.876	49.5079	544.504	31.7795
670.894	37.1471	566.349	35.5563	561.018	35.1273	562.108	49.6031	544.539	31.7097
670.883	37.0227	565.541	35.6351	560.279	35.6712	561.925	49.603	544.448	31.6196
671.657	36.7634	565.028	35.6722	556.751	37.0244	561.339	49.713	543.293	31.4817
671.261	36.9368	562.259	36.4946	556.263	37.4192	560.106	49.7086	542.586	31.4142
670.955	37.0342	560.124	36.8529	554.677	37.9901	557.742	49.589	543.389	31.2838
671.355	36.8458	556.926	37.7316	556.995	37.9514	555.713	49.5291	543.543	31.1406
671.462	36.8403	551.63	39.325	556.291	38.7062	553.209	49.2788	543.155	31.1417
671.688	36.8148	548.241	40.0727	555.881	39.3975	550.556	48.939	541.644	31.4759
671.637	36.8079	544.941	40.6956	555.097	40.036	547.716	48.5078	539.478	31.7493
671.7	36.7923	543.97	39.466	555.327	39.3902	544.586	48.0451	537.631	32.1746
671.588	36.873	542.625	38.7	556.005	37.3946	540.019	47.4531	534.928	32.4057
671.539	36.8443	543.367	38.2429	552.121	36.9644	534.559	46.957	531.41	32.6621
671.623	36.8097	543.366	37.6872	551.594	36.8065	528.356	45.7728	528.456	32.9732
671.722	36.7935	544.062	37.7433	548.26	37.26	525.235	44.6792	524.403	33.9014
671.454	36.8748	543.834	37.9764	541.642	37.7212	526.661	43.4633	519.726	34.7158
671.762	36.8703	544.353	38.343	530.564	38.3939	530.216	43.9127	518.411	33.9316
671.605	36.8654	543.902	39.6951	544.867	25.7733	533.507	44.1007	519.698	32.2528
671.608	36.8525	543.453	40.7557	542.411	23.7667	533.035	44.0314	518.721	32.15
671.686	36.7468	540.84	41.71	537.738	24.6207	534.844	43.7306	517.2	31.9225
671.074	37.0031	539.002	41.6747	536.282	23.9765	538.634	44.3775	518.277	31.8
671.064	36.9988	537.701	41.2215	535.456	24.048	540.436	45.4933	519.663	31.6626
671.788	36.7912	536.099	41.2035	540.83	27.117	538.639	46.6394	520.682	31.6518
671.221	36.9212	534.37	41.395	533.045	24.2041	535.617	48.1532	522.207	31.5105
670.842	37.1156	532.252	40.8952	532.518	24.4909	534.323	49.36	523.561	31.8299
670.745	37.1078	529.551	39.5923	537.528	21.8667	532.853	49.8394	523.588	33.2237
671.053	36.9763	525.911	36.9789	532.287	25.2923	531.062	50.6462	523.2	34.887
669.91	37.4244	523.709	35.6879	531.392	26.616	529.828	51.3781	521.71	35.7781
670.148	37.4786	522.984	35.723	531.015	27.2976	528.074	51.8985	519.714	36.6757
669.558	37.5196	522.959	34.9235	533.06	26.9953	525.323	52.394	517.771	37.4204
669.605	37.4108	522.779	34.892	529.404	28.9647	522.017	52.5057	514.199	37.3986
668.407	37.9061	523.107	35.1146	526.9	30.6667	518.456	51.8333	510.373	37.6946
668.308	37.8467	523.205	34.8744	526.513	32.4	513.245	50.4151	507.37	37.1974
666.769	38.2491	522.77	35.3076	518.246	37.1543	506.585	49.4525	504.16	35.9674
666.251	38.3293	520.307	35.8707	523.386	35.3859	503.821	51.1308	500.212	33.9366
664.491	38.9117	519.968	35.6813	516.312	38.0779	506.164	52.2819	495.663	32.2803
663.481	39.5333	518.705	35.8263	520.611	36.55	509.005	51.7726	494.98	32.2321
661.286	40.8713	516.406	36.3412	518.41	37.519	511.666	50.2617	496.056	32.1298
657.747	42.265	514.144	37.1944	518.849	37.7041	513.509	50.3429	495.134	31.921
659.01	41.22	510.719	37.9649	518.179	38.2256	513.983	50.0366	493.399	31.6815
661.258	39.1644	507.454	38.9927	518.368	38.9173	513.069	50.0429	494.181	31.8268
660.991	39.2121	502.844	39.9889	518.754	39.0769	512.077	50.0596	494.266	31.5923
661.521	39.1308	499.516	40.468	518.899	39.1852	513.421	49.966	494.082	31.5179
661.413	39.2283	500.392	38.432	520.8	39.585	513.021	50.0454	493.423	31.6265
661.492	39.5969	499.183	38.0419	517.611	36.5053	513.28	49.9343	491.761	31.7927
660.344	41.4567	498.817	37.7304	513.187	36.0254	512.919	49.9841	490.003	31.9815
661.277	42.9311	498.325	37.8	510.716	36.1614	511.426	49.7974	487.815	32.2993
661.205	43.1256	499.448	37.8957	506.548	37.3677	508.744	49.6583	484.717	32.709
657.447	42.0195	499.69	38.0469	496.605	41.41	505.976	49.25	481.21	33.0667
654.831	40.7395	499.551	39.0596	500.275	35.1625	503.424	49.1363	478.311	33.1447
654.824	39.9888	499.251	40.4574	501.633	28.4222	500.52	48.7541	474.257	34.4987
652.14	39.1225	498.694	41.2379	501.653	25.1467	497.519	48.373	470.057	34.8753
650.282	37.2342	496.909	41.8532	498.183	26	493.584	47.7229	469.54	33.3922
650.345	36.1883	494.444	41.7321	498.15	24.6	488.464	47.1541	470.67	32.1844
649.439	36.0472	492.645	41.4247	499.148	23.5826	482.57	46.1744	469.448	32.1012
648.988	36.0137	490.8	41.52	498.413	22.8625	479.486	44.7235	468.732	31.9325
648.428	35.9064	489.2	41.4211	500.37	21.66	479.627	43.6145	469.771	31.9497
647.35	36.0313	486.354	40.3114	499.017	22.3886	482.89	43.8405	470.942	31.8632
647.479	35.8679	481.861	39.0775	497.922	23.3652	485.898	43.9876	472.048	31.8309
646.971	35.8172	478.675	35.9987	487.867	29.0111	485.202	43.6412	473.972	31.6826
647.034	35.8133	479.008	35.916	494.714	27.3333	487.475	43.4347	474.749	32.12
646.668	35.9	478.682	35.3294	497.678	25.7073	492.169	43.8121	474.932	33.7497
646.412	35.8325	478.464	35.1373	493.776	27.8829	493.72	44.8053	474.2	35.2597
646.441	35.7127	478.456	35.2316	491.344	29.704	492.765	45.773	472.216	36.3095
646.433	35.6976	478.049	35.2315	492.24	30.4873	489.967	47.1472	470.428	37.0676
646.08	35.9506	478.161	35.1537	486.681	34.1375	489.027	48.3776	468.085	37.8667
645.498	36.2146	475.273	35.9788	488.363	33.9015	487.929	49.4324	464.669	37.46
644.29	36.4416	474.926	35.9914	483.733	36.3937	485.972	50.3092	461.05	37.6768
644.011	36.448	474.631	35.7986	482.206	37.0176	484.469	50.9851	457.746	37.1421
644.22	36.5234	473.361	36.0791	481	37.7892	483.914	51.4619	454.438	35.4872
644.421	36.4318	471.158	36.8053	479.695	38.4526	480.506	51.9021	449.925	32.7137
643.028	36.8935	468.375	37.4696	480.233	38.6025	476.604	52.2177	447.239	32.3608
642.75	36.8832	465.319	38.463	481.236	38.8104	473.278	51.9399	447.366	32.4753
642.19	37.2071	461.643	39.3783	481.617	39.2889	468.959	50.8228	447.339	32.1217
641.18	37.4114	456.849	40.3247	481.966	39.5211	462.274	48.8238	445.842	32.0994
640.267	37.7069	456.204	39.4922	480.232	39.916	457.973	49.6725	444.733	32.0422
639.35	37.7509	456.034	38.2149	479.774	38.5316	458.855	51.3925	445.572	32.0872
638.686	38.0548	455.02	37.8388	477.194	37.1278	462.411	51.7905	445.57	31.9392
637.853	38.1667	454.311	37.6859	476.261	35.6242	465.248	49.991	445.548	31.6098
637.233	38.4482	454.576	37.6935	467.742	39.2603	467.149	50.1	445.115	31.7821
636.804	38.4822	455.484	37.696	469.452	37.6923	467.307	49.693	443.237	31.8896
635.644	38.9791	455.452	37.9739	457.605	42.0632	467.043	49.7893	441.566	32.0549
633.931	39.78	455.103	39.2978	465.467	33.0963	465.696	49.6652	439.005	32.3377
632.606	40.6381	454.706	40.6236	466.949	25.7257	466.697	49.6158	435.499	32.873
629.695	42.0789	453.504	41.3435	467.256	23.6333	467.863	49.6447	432.508	33.0994
630.425	41.7208	450.978	41.4733	464.857	24.1829	467.184	49.5034	429.707	33.3163
631.647	40.2978	448.982	41.1	463.245	23.4727	466.648	49.4144	426.033	34.3786
631.671	39.9785	447.311	41.0241	461.695	23.6476	465.53	49.4882	421.595	34.848
631.374	39.7849	445.595	41.1706	459.88	24.32	463.351	49.1231	421.12	33.6773
631.844	39.3158	443.61	41.0277	461.951	23.0829	460.968	49.0803	422.858	32.3093
631.456	39.4444	440.927	39.822	461.774	22.9949	458.303	48.7033	421.001	32.16
632.093	39.4548	437.667	37.4077	458.124	25.2	455.686	48.3216	420.39	31.95
631.733	39.6415	434.123	35.2538	456.181	27.3905	452.958	47.8611	422.161	31.865
630.784	39.8708	434.517	35.2538	456.73	27.7043	449.88	47.5239	423.419	31.9083
630.874	40.8023	434.173	35.3519	457.689	27.3956	445.524	46.8834	424.301	31.7552
630.855	42.6103	433.768	34.7737	457.26	28.18	440.201	46.0945	425.582	31.8264
628.649	43.0798	433.967	34.9027	447.386	33.8929	435.272	44.9966	426.625	32.4335
626.352	41.7874	434.061	34.5889	454.992	31.2462	433.147	43.6092	426.327	33.9975
624.868	40.9701	433.705	34.8474	445.702	36.8444	434.765	42.9459	424.852	35.3714
623.684	39.8133	432.118	35.3059	446.615	37.0708	437.043	43.5371	423.94	35.8312
621.17	38.2826	430.748	35.413	446.55	36.9611	437.037	43.0605	421.582	36.5908
619.774	36.7509	430	35.4529	444.411	37.8137	438.236	42.8532	418.257	37.2286
618.793	36.7225	427.491	35.94	444.017	38.0222	442.791	42.7135	414.792	37.3089
618.342	36.5601	425.657	36.3743	444.096	38.1227	446.434	43.2723	411.735	37.15
617.711	36.2965	423.031	36.95	443.074	38.9684	445.77	44.1854	408.741	36.372
617.257	36.2613	420.129	37.7851	444.646	38.8923	442.973	45.485	405.203	34.6777
616.359	36.3295	417.561	38.429	444.605	39.4211	441.034	46.8701	399.151	32.4805
616.429	36.205	413.152	39.1606	445.564	39.0182	440.755	47.7988	397.804	32.3414
616.271	36.22	409.96	39.4564	444.25	38.7889	439.213	48.8131	398.655	32.2831
615.993	36.1575	411.583	37.4411	442.506	37.2437	438.382	49.6968	397.338	32.35
615.799	36.1	409.363	37.7857	433.877	39.0827	437.438	50.4359	396.757	31.7262
615.499	36.2464	410.057	37.2172	431.189	39.2789	435.165	51.0013	396.951	31.7222
615.803	36.1612	410.588	37.3286	431.081	38.8375	431.337	51.4634	397.258	31.5789
615.54	36.1906	410.584	37.6804	426.805	40.4164	427.629	51.4084	397.27	31.4909
614.958	36.5604	410.404	38.3755	429.081	35.7895	424.183	50.9086	396.959	31.4012
614.402	36.6934	409.713	39.566	428.496	30.528	418.92	48.954	395.791	31.4868
613.715	36.7806	409.234	40.8432	427.495	25.619	412.504	48.2867	394.186	31.5522
613.731	36.8364	408.651	41.4354	423.627	26.8533	411.317	50.0749	392.408	31.7881
613.532	36.9298	405.984	41.1505	426.697	23.9484	414.829	50.9805	389.19	32.3256
612.804	37.0926	403.757	40.7128	425.259	23.7463	418.697	49.7649	386.08	32.7535
612.17	37.3511	401.896	40.7435	426.031	22.4308	421.121	49.6079	383.121	32.9259
611.378	37.741	399.283	40.8167	427	21.4667	420.112	49.4234	379.805	33.7091
610.546	37.9561	397.638	39.9571	421.586	24.4276	420.721	49.3263	376.077	34.7104
609.573	38.274	394.909	38.1815	421.571	24.6857	420.163	49.3	372.181	34.7148
608.871	38.4481	390.613	34.9267	421.94	24.48	420.025	49.2845	372.525	33.1173
608.252	38.5471	389.952	34.8273	421.632	26.024	421.293	49.1665	374.02	32.0955
607.526	38.7525	390.033	34.7278	418.756	27.8133	421.338	49.1927	372.091	31.947
606.751	38.9957	389.065	34.2636	418.562	28.2	420.781	49.2814	371.741	31.7775
606.283	39.1261	388.895	34.45	420.062	28.2872	420.775	49.0658	373.407	31.6681
605.37	39.5136	389.2	34.375	411.01	34.0286	419.615	49.0963	374.379	31.7035
604.022	40.1804	389.158	34.0947	411.804	34.2939	417.114	48.7901	375.122	31.7241
602.137	41.3643	388.276	34.5141	411.973	35.2733	414.59	48.4346	376.38	31.7095
601.078	41.9392	386.254	35.2465	414.858	37.7161	411.995	48.1227	377.171	32.2938
601.714	40.8462	385.467	35.1812	409.307	36.6925	409.227	47.7466	377.076	33.6759
602.423	39.9484	384.27	35.2135	407.704	37.5246	406.041	47.4147	375.892	34.7108
602.054	39.8958	381.988	35.6101	407.588	37.5284	401.931	46.7154	374.017	35.529
601.755	39.8085	380.073	36.1494	407.53	37.9478	396.967	46.2711	371.326	36.4585
601.85	39.7792	377.615	37.022	408.496	38.107	391.322	45.7215	367.691	36.8655
602.041	39.8485	374.439	37.9043	408.628	38.75	386.419	44.0172	363.68	37.0793
602.591	39.9326	370.692	38.8792	408.818	39.0235	385.015	42.8879	360.865	36.5437
602.252	39.854	366.064	39.5604	407.656	39.5278	386.36	42.3069	357.144	35.6472
601.293	39.9941	366.313	38.2832	406.24	38.6057	390.869	42.8	353.901	33.1528
600.787	41.4978	365.855	37.7478	401.344	37.9875	392.323	42.7164	349.739	31.8941
600.655	42.6189	364.715	37.3576	393.834	39.9171	393.009	42.5978	349.17	31.8525
598.785	42.8351	365.189	37.4491	397.51	36.8581	396.258	42.6089	349.699	31.7718
596.649	41.683	366.079	37.2962	392.759	38.9623	398.981	43.519	348.476	31.5598
595.318	41.0789	366.475	37.4294	397.05	34.4429	398.902	44.5697	347.02	31.4625
593.831	40.6546	366.2	38.3846	391.084	33.2218	396.293	45.9172	347.607	31.5228
591.799	39.292	365.808	39.8547	389.118	27.7	394.337	47.4012	347.911	31.338
589.832	37.4205	364.112	40.7721	380.093	30.5116	393.034	48.2947	347.559	31.2
589.058	37.0333	362.639	40.9392	384.705	27.1368	392.284	48.853	347.31	31.1926
588.543	36.9484	360.352	40.6717	386.613	24.6894	390.694	49.4965	346.326	31.2
587.908	36.8518	358.311	40.3485	384.631	25.12	388.513	50.4733	344.657	31.3427
587.324	36.8957	356.557	40.2447	386.283	23.6683	385.947	50.8977	342.58	31.475
587.043	36.9409	353.9	39.7	387.818	22.6727	382.904	51.0756	339.472	32.0686
586.695	36.8978	351.725	39.2032	385.83	23.6766	379.582	51.0364	336.057	32.5293
586.468	36.8255	348.239	36.6273	385.431	24.0978	375.54	50.1312	332.926	32.7041
586.323	36.8979	344.327	34.5182	384.145	25.5234	370.11	48.0584	329.455	33.5322
586.104	36.99	344.906	34.5177	377.923	29.7614	364.869	48.4327	325.118	34.6133
586.069	36.8882	344.667	34.3346	373.696	32.2957	365.629	50.0729	321.359	34.5206
586.087	36.9222	344.071	34.0215	375.408	32.216	370.251	50.3459	323.082	32.4667
586.013	36.95	345.028	34.5047	369.053	36.48	374.245	49.2589	324.398	31.8436
585.289	37.0079	345.107	34.1698	373.185	34.9455	373.556	49.8244	321.673	31.6292
584.712	37.2656	344.156	33.9138	376.636	33.9214	373.178	49.0898	321.63	31.4129
584.147	37.3779	342.985	34.5103	373.975	36.0889	373.633	49.0409	323.895	31.3011
583.945	37.4305	341.257	34.6325	370.915	37.5068	373.218	49.0537	325.053	31.3511
583.483	37.5101	340.663	34.5521	369.211	38.3263	374.78	48.7799	325.888	31.3803
583.029	37.7396	338.431	34.9494	371.097	37.1143	374.684	48.75	327.17	31.4225
582.041	37.9763	336.43	35.6877	371.447	37.0882	374.563	48.7254	327.777	32.4153
581.212	38.2881	334.344	36.3558	371.408	37.5413	374.521	48.7551	327.681	33.7213
580.165	38.5984	329.812	37.8265	371.481	38.187	374.337	48.6983	326.099	35.0761
579.319	38.91	328.221	37.8327	372.372	38.3056	372.844	48.68	322.83	36.2924
578.611	39.2122	324.061	39.0864	372.761	38.5	371.013	48.3261	321.52	36.5622
578.037	39.2919	319.682	39.5393	371.956	38.6111	367.892	48.2422	318.735	36.9826
577.348	39.275	322.044	36.839	369.963	36.7787	365.146	47.686	315.243	36.8535
576.735	39.55	318.978	37.9752	362.965	37.8187	362.266	47.3906	311.899	36.4809
575.885	40.0136	319.576	37.258	361.017	37.4686	358.856	46.8667	308.761	35.237
574.778	40.6478	320.823	36.8041	359.27	37.581	354.195	46.085	303.677	33.2
573.072	41.738	321.856	36.8705	353.363	40.2737	348.601	45.4962	297.84	32.266
571.902	42.6541	321.142	37.4795	354.293	36.6806	341.92	44.278	298.299	32.0396
573.013	41.3414	320.833	38.3298	350.814	33.0305	337.638	42.8394	299.133	31.9065
574.788	39.982	320.347	39.5496	353.555	25.2818	337.39	41.6967	298.083	31.5538
573.635	40.182	318.291	40.9744	348.958	26.875	339.847	41.5084	297.304	31.2089
573.722	40.368	316.745	40.8621	347.909	26.7091	344.586	42.1588	297.866	31.1957
573.657	40.5431	314.873	40.2233	342.555	28.4816	345.688	42.0469	298.284	30.9778
574.215	40.6407	312.321	39.7953	348.473	23.9455	346.616	41.796	297.767	30.8747
574.55	40.628	310.344	39.66	346.757	24.8426	349.029	42.1401	297.501	30.9017
574.059	40.6333	308.488	39.2667	349.419	22.9905	351.43	43.2126	295.952	31.1239
574.231	41.7551	304.901	38.1462	348.447	23.414	351.073	44.2704	293.902	31.2872
573.293	43.3435	300.463	35.7382	348.091	24.1273	348.64	45.8105	292.124	31.4414
571.977	43.8437	299.533	34.3089	341.2	29.5818	346.676	47.1895	288.478	31.9419
569.801	43.2547	300	34.2023	342.533	29.0583	345.537	47.9457	284.933	32.2065
567.453	42.4094	298.809	33.7682	341.526	29.6074	344.187	48.3097	282.68	32.1741
566.591	42.1624	298.347	33.7222	342.558	29.5583	342.417	49.0815	279.108	33.0613
565.372	41.922	298.914	33.7955	339.659	31.8222	339.903	49.7596	274.547	34.1642
564.113	41.1806	298.7	33.5609	335.111	35.6056	336.477	50.2646	271.775	33.7172
562.294	40.0137	298.279	33.6978	334.395	36.9506	333.228	50.53	273.137	31.6819
559.604	37.5168	295.945	34.6682	332.123	39.2718	329.913	49.7782	273.471	31.4616
559.08	37.2835	295.116	34.278	331.793	38.846	325.028	48.5446	271.535	31.0404
558.961	37.3913	293.473	34.7518	330.209	39.2884	318.998	47.539	272.371	31.0155
558.471	37.4616	291.242	35.1605	329.229	39.8714	317.772	48.84	274.384	30.96
558.097	37.2588	289.007	36.0679	330.376	39.0905	322.564	49.4297	275.43	30.9932
557.736	37.2853	287.647	36.06	330.13	39.7349	327.547	48.8677	276.587	30.9616
557.512	37.202	284.761	37.0071	334.61	37.955	328.357	49.0416	277.552	31.196
557.216	37.1913	282.007	37.4382	335.178	38.3405	326.489	48.8238	277.894	32.2745
556.829	37.259	277.764	38.4213	335.19	38.3949	326.671	48.5809	277.521	33.7103
556.794	37.3404	274.251	38.5822	332.658	38.1421	326.123	48.4082	275.954	34.6061
556.77	37.3436	275.569	36.4858	329.067	37.2238	327.928	48.4482	273.571	35.4712
556.657	37.2921	274.635	36.4587	323.845	37.4507	328.143	48.3137	270.414	36.1525
556.568	37.33	274.149	36.3062	323.448	36.7944	328.002	48.2737	266.495	36.4552
555.791	37.6085	274.57	36.3567	321.6	37.4783	327.695	48.2392	262.871	36.1061
555.202	37.7557	275.288	36.5049	321.065	36.1292	327.532	48.2736	259.844	35.2061
554.703	37.9921	274.828	37.3481	312.681	37.3766	327.032	48.1559	255.48	33.628
554.585	37.9404	274.378	38.3961	308.301	33.0493	324.935	48.1686	250.933	31.3418
554.396	38.0021	273.685	39.5242	313.239	26.5569	321.715	47.5583	249.36	31.3224
553.755	38.1234	271.926	40.1548	308.951	27.7132	318.617	47.4771	250.228	31.1872
552.91	38.5559	269.759	40.0968	303.524	30.1778	315.362	46.8061	249.116	31.114
551.812	38.8979	267.298	39.6322	310.471	24.2275	312.27	46.3919	247.214	30.8289
550.937	39.2417	264.763	39.3689	307.731	24.7154	308.59	45.8812	247.569	30.9359
550.285	39.2678	263.312	39.5992	307.273	25.3236	303.52	45.1337	247.622	30.8345
549.735	39.5889	259.671	39.2036	309.109	23.7208	297.482	44.4816	247.737	30.84
549.095	39.692	256.963	37.0495	307.235	25.2912	291.218	42.8987	247.295	30.6415
548.531	39.7942	252.13	34.0652	307.029	25.9673	288.345	41.6304	247.544	30.4503
548.509	39.8798	252.782	33.8056	304.913	27.8566	288.389	40.7785	246.187	30.4105
547.414	40.4515	250.376	35.656	305.621	27.9786	292.361	41.1107	244.054	30.792
545.781	41.6592	251.949	33.2558	303.252	30.0258	295.677	41.4459	241.463	31.1922
544.349	42.3085	252.154	33.6357	300.497	32.2258	295.316	41.4	237.59	31.492
544.969	41.4437	252.481	33.6731	301.736	31.6814	297.268	41.0525	234.655	31.8265
545.742	40.683	251.576	33.496	298.768	34.7895	300.245	41.9178	231.472	32.2203
544.884	41.0367	251.33	33.6913	295.879	37.3895	302.119	42.8713	227.895	33.1733
544.93	41.0137	249.475	33.9792	295.831	37.7487	300.642	43.9904	223.412	34.0898
544.898	41.0447	248.74	34.0591	294.915	37.269	298.189	45.6736	219.6	34.17
545.306	40.9887	246.173	34.8237	295.926	37.5126	296.792	46.8117	221.647	31.8746
545.894	41.0766	244.991	35.2174	292.524	38.3378	295.619	47.4938	221.858	31.5709
546.055	41.0192	242.933	35.6867	292.271	38.72	294.126	47.8813	220.13	31.4333
545.839	41.601	240.133	36.6684	292.571	39.1596	292.067	48.7609	219.321	31.898
545.806	42.9	237.834	36.5983	296.979	37.7692	289.178	49.2694	221.798	31.4344
544.761	44.302	234.082	37.5063	296.475	38.15	286.191	49.5704	223.112	31.298
543.188	44.5643	229.285	38.7727	296.727	38.1268	282.732	49.4697	223.506	31.4288
540.764	43.816	229.062	37.8489	293.501	37.1325	278.353	48.729	225.323	31.212
538.902	43.103	229.815	36.0508	288.55	37.535	272.878	46.8939	225.929	31.9768
538.467	43.436	227.263	36.1617	283.948	38.3247	268.039	47.1013	225.801	33.2574
537.471	43.2426	228.327	36.0061	281.429	39.556	269.637	48.6111	223.783	34.2857
536.522	42.8756	228.576	36.2152	283.392	37.6282	275.609	48.1427	220.34	35.607
534.613	41.6149	228.636	36.3545	281.038	37.0649	279.505	48.3208	217.418	36.2679
532.537	39.4642	227.991	37.4029	278.696	33.4082	277.906	48.3849	214.781	35.9437
530.649	37.7272	227.684	38.5478	272.309	28.7579	276.284	47.7991	211.451	35.7109
530.109	37.6789	226.969	39.4415	274.672	24.6189	276.875	47.8189	208.171	34.8972
529.854	37.8312	224.228	40.5161	271.428	27.2552	276.902	47.8667	204.113	33.0751
529.736	37.6802	222.71	39.6674	269.969	25.275	278.652	47.8205	198.778	30.8436
529.202	37.7565	219.756	39.3889	265.729	27.4929	278.554	47.7171	196.967	30.7841
529.049	37.7645	216.846	39.4372	269.258	24.8291	278.392	47.6133	197.771	30.7534
528.927	37.7	214.63	39.2451	266.471	26.8071	278.102	47.6962	196.761	30.5767
528.688	37.8319	211.461	39.3357	268.981	24.5585	277.956	47.7297	194.639	30.4275
528.633	37.7825	209.137	35.9353	267.938	26.1379	276.986	47.7559	195.341	30.3163
528.642	37.7642	204.127	34.3192	266.126	27.1481	275.673	47.3198	195.39	30.1352
528.502	37.7208	205.921	33.7458	268.533	26.5	273.75	46.981	195.627	30.0917
528.244	37.7914	205.119	33.3788	267.331	27.2727	270.496	46.507	195.103	30.0949
527.312	38.1184	204.116	32.9206	264.691	29.3091	267.486	46.1682	195.211	29.9868
526.974	38.2662	204.618	33.0723	260.826	32.8895	264.26	45.8206	193.451	29.9227
526.658	38.4	204.24	33.2562	264.165	31.1294	259.765	45.3213	191.471	30.1791
526.418	38.3707	204.108	32.772	260.905	34.1	253.404	44.2407	188.061	30.5741
526.195	38.4503	202.371	33.6542	258.572	35.9949	246.626	43.3861	183.904	31.2618
525.623	38.5	200.885	33.5323	254.404	38.6495	240.721	41.4565	181.511	31.3821
524.603	38.9796	199.86	33.48	255.444	37.5172	238.179	40.5012	178.002	31.9697
523.762	39.2695	197.757	34.6423	254.649	37.7176	239.062	39.6118	174.387	33.1518
523.043	39.5109	195.548	34.5261	252.981	38.3579	244.337	40.695	169.783	33.7166
522.534	39.7995	193.869	35.2386	254.232	38.3958	248.305	41.1897	167.679	33.0929
522.029	39.7816	190.99	36.2871	254.212	38.8367	249.669	40.8034	169.41	31.0474
521.812	39.9198	187.649	37.0967	256.195	38.0419	249.528	40.7983	169.634	31.0486
521.187	40.1087	183.377	38.2298	256.264	38.5955	251.051	42.0137	167.803	30.6097
520.545	40.2505	178.353	39.4412	256.582	37.95	252.585	42.8137	168.568	30.6335
520.054	40.612	180.064	37.042	251.893	37.8829	252.095	44.1345	171.12	30.6446
519.293	40.7686	179.665	36.3868	246.453	38.2044	249.497	46.3094	171.85	30.5656
518.763	40.8942	179.1	35.6848	243.892	37.9226	248.458	46.6447	172.494	30.4733
518.17	41.0561	179.051	36.055	242.303	38.2621	247.031	47.4191	173.318	31.0869
518.208	40.8264	179.942	35.6723	240.124	38.1778	245.453	47.9207	173.436	32.2964
517.815	41.0025	179.461	36.5696	242.464	32.1391	242.834	48.4034	172.442	33.6419
517.912	41.0059	179.125	37.706	237.009	29.6119	239.347	48.9017	170.545	34.522
518.633	41.3804	178.752	38.7738	237.048	26.0889	236.469	48.9405	168.015	35.2441
519.154	41.3953	177.697	39.3743	234.557	24.0929	233.538	48.8101	164.946	35.7992
519.705	41.4958	175.319	39.6403	233.752	24.2921	228.377	47.8583	161.318	35.9869
519.644	41.5604	172.636	39.2967	230.989	24.4561	222.591	46.467	156.915	36.2114
519.649	42.5697	169.939	38.9084	230.161	23.5032	220.051	47.0076	154.26	35.0226
520.016	43.9927	167.375	39.0636	229.015	24.4179	223.614	47.9983	149.509	33.4873
518.657	45.1744	166.121	38.7605	229.679	23.6131	230.157	47.5268	143.629	31.0448
516.814	45.0505	162.724	37.482	227.412	25.4788	230.802	47.8456	143.092	30.6936
514.291	44.0423	158.826	35.2908	229.962	23.8038	227.767	47.3957	144.402	30.653
512.951	43.5433	155.481	33.1192	228.716	25.3123	227.094	47.3097	143.098	30.5217
512.35	43.8045	156.702	33.2636	226.807	27.2073	227.427	47.3485	141.067	30.1059
511.135	43.1747	157.272	33.1755	226.169	27.5562	228.678	47.3093	141.658	30.2449
509.608	42.4021	156.079	32.8759	224.813	29.0133	229.569	47.3555	141.861	30.0446
507.666	40.6234	156.737	33.0933	226.676	28.1803	230	47.2125	141.981	29.8397
505.075	38.2196	157.014	33.0754	223.535	31.1235	229.848	47.1983	141.504	29.9357
504.718	38.0589	156.996	33.9351	218.776	35.1755	230.07	47.1721	140.188	30.0138
504.552	38.0833	154.185	33.8901	217.209	37.0742	229.98	47.0655	138.548	30.2911
504.298	38.1696	151.326	33.8568	216.375	36.9155	228.576	47.1362	136.601	30.3137
503.753	38.0612	150.568	33.596	213.612	37.8447	227.612	46.7328	134.07	30.8821
503.508	38.0337	148.236	34.1318	213.677	38.2545	224.754	46.3051	130.007	31.4052
503.405	38.0623	146.183	34.6845	215.181	37.4943	221.425	46.045	126.456	31.5217
503.141	38.1848	144.209	35.5171	212.895	39.0535	218.207	45.6467	122.777	32.4884
502.979	38.1426	141.4	36.2	212.164	40.1344	214.113	45.0805	118.333	33.8195
502.938	38.1458	137.873	37.1031	215.259	38.7345	208.481	44.2553	114.125	33.6158
502.941	37.9821	133.97	37.8319	218.721	37.3292	202.218	43.5794	114.94	31.9286
502.87	38.0691	130.598	38.114	217.834	36.8213	194.61	42.3802	116.713	30.7203
502.284	38.306	132.156	35.8308	211.128	37.6717	189.539	40.5912	113.963	30.6817
501.752	38.4125	130.564	36.3537	211.165	34.9319	188.419	39.6736	113.189	30.5085
501.064	38.544	130.359	35.743	204.082	36.9545	190.015	39.4939	115.771	30.4453
500.984	38.5306	131.06	35.8359	206.72	34.0971	196.749	40.6198	115.483	31.0993
500.848	38.5674	131.873	35.8364	201.679	34.716	200.688	40.5724	115.957	31.1896
500.568	38.6511	131.118	36.6424	199.638	30.9753	200.612	40.6008	116.552	31.4595
500.062	38.9406	130.318	37.8559	196.5	26.4312	200.15	40.736	117.823	31.8923
498.941	39.186	129.924	38.9382	194.231	24.3119	202.069	41.8996	117.021	33.6285
498.173	39.5124	128.628	39.6839	196.375	21.5429	203.404	43.0782	116.003	34.8104
497.407	39.6648	126.415	39.6896	194.324	21.0603	202.487	44.5694	114.809	35.2119
496.931	39.9465	123.569	39.1277	190.038	23.5048	200.3	45.9871	112.329	35.7901
496.683	40.0454	120.74	38.8933	189.903	22.8645	198.089	46.936	109.278	36.0479
496.37	40.1142	117.991	38.8405	190.743	22.0643	196.522	47.4943	106.146	35.674
495.618	40.3167	115.203	38.2519	192.786	20.2	194.887	47.6626	102.749	35.149
495.114	40.678	112.165	36.1756	191.058	21.6516	191.776	48.3197	99.2176	33.9328
494.475	40.8253	106.858	33.9576	189.507	23.6116	187.966	48.8241	94.1951	31.7557
494.11	40.758	107.285	33.9712	186.475	26.6102	184.994	48.6811	89.3411	30.5112
493.68	40.824	108.294	33.5416	187.232	26.2159	181.603	48.1825	89.2961	30.582
493.014	41.024	106.177	33.3933	187.102	26.3213	176.269	46.9024	90.161	30.3237
492.932	41.097	106.78	33.1576	184.473	29.1927	169.91	46.1233	88.4175	30.0733
492.721	41.1646	106.751	33.2886	185.244	28.6187	169.272	47.1707	87.0047	30.0078
492.477	41.1778	106.928	32.7639	182.941	31.2341	174.647	47.516	87.6894	30.0408
492.804	41.4403	106.203	33.3839	177.992	36.349	180.659	47.3033	88.2337	29.8716
493.653	41.5761	104.457	33.9643	176.649	37.1107	179.532	47.6838	87.5642	29.7935
493.897	41.5747	103.856	34.088	173.483	38.3094	177.577	46.8894	87.5131	29.7459
493.934	41.6897	101.408	34.0208	176.19	36.16	177.557	46.8494	86.3839	29.7919
494.331	43.0312	97.3026	36.6556	175.579	36.2062	177.346	46.8227	84.1823	30.0065
494.86	44.7107	97.5786	35.1	174.773	36.9553	179.646	46.8148	81.4793	30.4603
493.145	45.6919	94.1244	37.0092	172.869	38.6291	179.023	46.8591	77.9	30.9
491.079	45.2602	92.032	36.5848	176.207	37.5214	179.484	46.4418	74.8342	31.1704
488.551	44.2146	88.2469	38.0125	172.944	39.423	179.267	46.5665	71.7188	31.4656
487.334	43.7536	83.655	38.4038	174.493	39.1214	179.087	46.6016	68.0362	32.5543
486.996	43.9549	84.1795	36.4543	174.144	37.3658	178.452	46.5107	62.9227	33.6255
485.721	43.5133	84.1827	36.0606	172.257	36.0792	176.688	46.4859	60.0769	32.902
484.428	42.8444	82.4885	35.7229	166.579	36.2375	173.989	46.3799	61.2243	30.8137
482.549	41.2164	83.2471	35.7618	162.426	38.6333	171.109	45.8992	61.6672	30.5445
479.719	38.4243	83.3134	35.7	164.514	33.9	167.7	45.6414	59.0084	30.0654
479.182	38.3927	84.1197	35.9818	162.548	31.0667	164.619	45.13	59.9185	30.0015
479.038	38.4243	83.6088	36.9324	160.816	27.1307	159.872	44.4015	62.02	29.9923
478.874	38.4093	83.1791	38.1925	160.349	22.3873	153.854	43.7945	62.8195	30.0285
478.338	38.2809	82.2758	39.297	153.674	23.28	146.583	42.9673	64.2898	30.0045
478.234	38.4368	80.3822	39.8289	154.238	22.0812	139.14	41.2211	66.0196	30.0785
478.159	38.4831	77.8647	39.5853	152.446	23.8377	135.396	39.7634	66.3536	31.1136
477.897	38.4677	74.7687	39.5125	150.36	23.8	134.392	38.4427	65.6046	32.724
477.701	38.3758	72.1489	38.9365	152.249	20.1508	137.926	39.0515	64.1236	33.8851
477.65	38.4083	69.9639	38.5406	151.924	20.4952	144.827	40.1843	62.3386	34.7131
477.52	38.3928	67.6641	37.9153	154.006	19.625	147.309	40.0219	59.9358	35.3781
477.431	38.3741	63.7167	35.9167	151.903	20.2182	146.218	40.171	56.2317	35.8332
476.972	38.5452	58.3664	34.0311	149.317	22.8444	147.059	40.5813	52.7152	35.7212
476.52	38.6053	60.3643	33.4893	146.441	25.5647	149.517	42.0415	49.3247	35.0935
476.123	38.8355	59.7124	33.381	148.5	24.075	150.251	43.2966	45.513	33.9176
475.914	38.7301	58.5226	32.9516	146.561	25.9719	148.323	44.7591	40.1462	31.54
475.648	38.9253	59.2775	33.1465	146.324	26.7471	145.532	46.1955	35.2286	30.3175
475.408	38.9535	59.0721	33.0213	143.656	29.1662	143.948	46.7879	35.6446	30.3354
474.812	39.0313	58.7377	32.9131	143.101	30.2519	142.466	46.963	36.8643	30.2185
473.706	39.4755			139.009	34.2512	140.049	47.4046	34.6415	29.9662
472.991	39.7995			138.09	36.0408	136.554	48.0353	33.097	29.903
472.103	40.02			132.569	37.4154	133.356	48.2489	33.909	29.894
471.681	39.9579			134.931	36.0515	130.664	48.3806	34.397	29.7378
471.559	40.2621			134.128	36.2165	127.139	47.6459
470.802	40.4876			133.923	36.2077	121.471	46.0981
470.034	40.7826			133.536	36.95	115.909	45.9296
468.751	41.8327			132.164	38.682	116.713	46.872
466.696	43.0585			133.221	38.2793	123.175	46.6301
466.969	42.5709			132.883	38.0862	127.362	46.8502
468.06	41.4981			134.105	35.301	125.188	46.9261
467.723	41.5068			128.908	36.0038	123.335	46.428
467.147	41.5439			127.411	34.418	123.439	46.3073
467.359	41.5706			126.993	33.4198	123.622	46.4675
466.929	41.5771			126.005	32.016	125.735	46.2319
467.29	41.7241			123.362	29.6973	125.941	46.1914
467.724	41.836			118.276	25.2789	126.051	46.1012
468.073	41.8735			113.472	23.6928	125.271	46.155
468.069	42.1098			113.346	23.5268	124.634	46.2774
468.02	43.348			112.653	22.3059	122.595	46.2768
468.346	44.6072			108.6	23.6222	119.568	46.0655
466.982	45.2921			113.862	20.5574	116.761	45.8552
464.521	44.995			111.244	19.8476	113.612	45.7164
462.433	44.0904			111.127	20.1236	109.698	45.3272
461.569	43.8755			112.651	20.9851	106.167	44.5672
460.568	43.7574			111.829	20.6032	100.522	43.9072
459.326	42.916			108.78	22.5933	93.797	42.9805
457.741	41.8427			109.514	23.3143	86.2943	41.7208
455.252	39.4652			104.303	27.0108	81.075	40.0359
454.026	38.3957			106.277	25.7226	78.391	39.0307
453.692	38.5527			101.279	30.3753	79.4492	38.4877
453.565	38.6246			105.644	26.8148	85.9507	39.5101
452.893	38.4513			99.9325	31.8169	89.4632	39.6387
452.727	38.3802			97.3702	34.6468	89.6644	39.4457
452.815	38.5132			96.1732	35.0763	90.1104	39.2866
452.53	38.4481			96.1538	34.022	92.1216	40.7707
452.203	38.4116			94.696	35.148	93.9126	41.7867
452.208	38.4475			94.5567	34.8536	92.6426	43.4152
452.125	38.4475			95.6911	35.2317	90.4773	44.8981
451.975	38.3989			94.9752	36.0229	88.962	45.6989
452.021	38.3833			95.7735	36.0885	87.678	46.2383
451.409	38.6015			96.2629	35.7981	85.6374	46.8273
450.853	38.8026			95.6652	35.7652	82.4227	47.5234
450.488	38.6937			92.763	34.4852	79.1095	47.946
450.546	38.7477			91.3395	32.707	76.0436	48.144
450.192	38.9639			88.3422	32.8	72.2949	47.7416
449.754	39.0875			85.4091	33.6364	67.4043	46.5295
448.783	39.3783			84.305	32.015	60.8645	45.2967
447.875	39.8167			80.1857	30.9048	59.4909	46.2636
447.049	39.9939			79.4	23.6061	65.1805	46.8977
446.563	40			75.4029	20.4348	72.4894	46.4773
446.356	40.132			77.1088	18.8982	72.2054	46.6764
445.906	40.2948			75.1018	17.5158	69.6015	46.3295
445.237	40.6897			72.1314	19.2743	69.0421	46.1865
444.217	41.3211			73.3556	21.9167	68.6189	46.2506
442.343	42.8139			73.6418	20.5493	70.3188	46.1353
440.975	43.5514			71.1333	20.2242	71.4789	46.1119
441.47	42.3742			70.3333	20.5556	71.1008	45.9795
442.571	41.5562			70.56	20.56	70.9333	45.9234
442.026	41.67			68.4464	24.2145	70.6307	46.006
441.79	41.561			68	23.5224	69.6982	46.0028
441.871	41.5957			65.7212	24.3939	68.0457	45.9003
441.62	41.6717			67.1	26.285	64.643	45.9235
441.899	41.6162			62.6769	28.1128	61.8086	45.5729
442.324	41.6864			60.8589	29.4905	58.3423	45.2859
442.571	41.8458			57.4063	32.7705	54.9265	44.8715
442.324	42.4184			57.675	33.0125	50.5366	44.1017
442.567	43.602			55.8887	33.7814	44.3165	43.3554
442.869	44.9808			54.697	33.7228	36.9491	42.4797
441.522	45.4054			53.8192	34.2462	29.3695	40.7298
438.74	44.8244			52.3352	35.3067	24.502	39.1482
436.941	44.1343			53.4301	35.3947	22.6052	37.7442
436.355	44.1893			52.6656	36.5475	26.0059	38.4835
435.572	44.118			55.7967	35.9133	32.9926	39.32
434.364	43.4939			53.1614	36.7895
432.863	42.5356			49.7621	36.4966
430.563	40.3139			48.9357	34.4107
428.662	38.6168			44.9071	34.1286
428.121	38.5944			46.4043	30.714
428.211	38.7591			45.7687	29.4506
427.813	38.5219			43.1802	29.1111
427.382	38.476			39.8486	25.8595
427.323	38.6518			34.5351	21.8162
427.238	38.6047			34.3164	19.3791
427.03	38.5725			35.538	19.6394
427.005	38.6685			32.8056	16.3042
426.935	38.6134			32.2286	17.2971
426.786	38.5821			36.9352	18.1465
426.775	38.5984			32.8194	17.5677
426.008	38.802
425.772	38.7828
425.395	38.9145
425.374	39.0232
424.958	39.0868
424.572	39.1162
423.773	39.3588
422.763	39.7577
421.922	40.2052
421.217	40.3761
421.255	40.1946
420.527	40.2778
420.096	40.602
419.147	41.0662
417.488	42.4423
415.835	43.6775
416.046	43.1899
417.3	41.6721
416.878	41.5647
416.563	41.7111
416.718	41.6333
416.593	41.6589
417.109	41.7531
417.383	41.8981
417.05	41.9577
417.148	43.1316
417.968	44.5537
417.263	45.3516
415.64	45.3037
412.435	44.5166
410.788	43.5212
409.832	43.3038
408.363	42.3477
406.668	40.9447
404.101	38.801
403.656	38.5562
402.96	38.8655
402.808	38.8137
402.636	38.392
402.442	38.4717
402.392	38.4938
401.931	38.6239
402.017	38.4813
402.036	38.5894
401.977	38.5784
401.929	38.5796
401.967	38.4714
401.309	38.5376
400.33	39.1051
400.396	38.7965
400.349	38.7495
400.085	38.8691
399.938	38.9796
399.188	39.144
398.33	39.5874
397.495	39.9312
396.648	40.1606
396.369	40.1098
395.933	40.2837
395.418	40.4041
394.705	40.6836
393.885	41.3558
391.998	42.6449
391.32	43.0185
391.971	41.9986
392.583	41.3367
391.9	41.6324
391.837	41.5758
391.571	41.58
391.574	41.6576
392.181	41.8192
392.426	41.8778
392.157	42.0809
392.245	43.3093
393.05	44.922
392.227	45.518
390.233	45.0964
387.514	43.8898
386.159	43.3555
385.129	43.0208
383.103	41.4951
380.747	39.2959
379.222	38.8518
379.103	38.6261
378.927	38.5836
378.33	38.4526
377.143	38.8275
377.882	38.4066
377.615	38.3286
377.452	38.264
377.392	38.3634
376.777	38.5906
376.983	38.5136
377.106	38.4765
376.725	38.3931
376.444	38.4729
375.883	38.5697
375.639	38.7335
375.371	38.7814
375.109	38.8086
374.85	38.9267
374.092	39.1428
373.196	39.5415
372.5	39.8163
371.838	39.9493
371.219	40.0624
370.775	40.2885
370.119	40.4035
369.504	40.7255
368.372	41.3717
366.594	42.5416
366.582	42.3814
367.423	41.2385
367.322	41.2709
366.779	41.4484
366.857	41.2767
366.646	41.5028
366.789	41.309
367.4	41.5505
367.482	41.6023
367.39	42.1695
367.915	43.6908
368.261	45.1147
367.033	45.5447
364.809	44.7172
362.182	43.3
361.021	42.8049
359.357	41.8314
356.929	39.7471
355.384	38.366
354.729	38.2235
354.39	38.1902
354.039	38.1751
353.458	38.1846
353.357	38.2283
353.073	38.1976
352.891	38.1114
352.7	38.1335
352.655	38.0908
352.549	38.1516
352.51	38.1165
352.566	38.1237
352.432	38.1789
351.939	38.1708
351.299	38.2067
350.712	38.3224
350.687	38.2673
350.521	38.2386
349.816	38.4703
349.141	38.722
348.322	39.0703
347.488	39.3176
346.978	39.5783
346.472	39.8333
345.761	39.7863
344.977	40.0585
344.25	40.5972
342.601	41.7359
342.137	41.9256
342.698	40.9438
342.875	40.6956
342.391	40.9413
342.395	40.8674
342.029	40.7733
342.142	40.7539
342.641	40.9072
343.136	41.2055
343.211	41.3959
343.333	42.4738
344.043	43.9595
344.215	45.4991
342.583	45.3655
339.917	44.0889
337.57	42.8792
336.619	42.2623
334.792	40.9815
331.975	38.5226
330.432	37.7508
329.968	37.597
329.614	37.601
329.231	37.4561
328.816	37.4861
328.366	37.3883
328.333	37.3819
328.128	37.4053
327.965	37.3165
327.899	37.3833
327.915	37.4309
327.89	37.3789
327.856	37.4682
327.372	37.4046
326.683	37.4868
326.458	37.4758
326.268	37.3587
326.327	37.3658
325.604	37.7288
325.133	38.0133
324.398	38.0643
323.485	38.4495
322.579	38.7493
321.517	39.3147
320.855	39.5128
320.251	39.7092
319.823	39.8604
318.927	40.3161
318.062	41.2595
316.592	41.985
316.857	41.2461
317.509	40.6869
316.959	40.7208
316.824	40.6502
316.674	40.6719
316.735	40.6494
317.438	40.7759
317.797	40.971
317.709	41.1216
318.028	42.388
318.641	43.7974
318.135	44.4846
316.229	44.4163
313.434	43.1865
312.352	42.5167
311.561	42.4266
309.644	41.3202
307.479	39.0589
304.852	37.4093
304.101	37.455
304.175	37.3577
303.385	37.5619
303.509	37.1959
302.978	37.1721
302.466	37.4826
302.752	37.2822
302.553	37.1471
302.601	37.2572
302.615	37.1714
302.443	37.1757
302.464	37.0841
302.026	37.1991
301.27	37.3143
300.896	37.2727
300.753	37.2649
300.66	37.3316
300.575	37.2895
299.835	37.4236
299.177	37.7885
297.937	38.2782
297.107	38.4577
296.333	38.9148
295.498	39.2607
295.148	39.307
294.559	39.5061
293.848	39.8093
292.611	40.6073
290.791	41.9672
290.43	42.0244
291.367	40.6622
291.589	40.5
290.734	40.6701
291.017	40.5443
290.733	40.6157
290.858	40.676
291.387	40.7366
291.635	40.792
291.269	41.4966
291.831	42.8268
291.976	44.15
290.749	44.4021
288.32	43.5
285.597	42.2259
284.808	41.8237
282.944	40.5083
280.513	38.4527
278.732	37.1613
278.087	37.0642
277.776	37.2111
277.447	36.8948
276.35	37.2328
276.852	36.9051
276.372	37.0904
276.177	36.9429
276.279	36.7793
276.356	36.9119
276.254	36.8546
276.211	36.7996
275.942	36.7921
275.499	36.9151
274.925	37.06
274.675	37.0322
274.305	37.0892
274.343	37.0835
274.073	36.9617
273.346	37.1699
272.301	37.6864
271.575	37.8191
270.629	38.4048
269.741	38.8655
269.28	38.7279
268.723	38.8478
268.287	39.1717
267.61	39.4573
266.189	40.5914
264.473	41.5789
263.987	41.6857
264.919	40.5516
264.931	40.4921
264.459	40.4076
264.836	40.3266
264.592	40.3885
264.938	40.4278
265.546	40.5348
265.34	40.5898
265.189	41.4516
265.799	42.9816
265.358	43.8019
263.879	43.7148
261.539	42.8226
259.879	42.1902
259.058	41.8683
257.202	40.6004
254.78	38.5238
252.601	36.8004
251.95	36.546
251.931	36.6738
251.549	36.5667
251.093	36.4029
250.781	36.5186
250.869	36.5102
250.681	36.5068
250.483	36.4813
250.534	36.4157
250.442	36.4347
250.421	36.3716
250.194	36.371
249.404	36.6333
248.991	36.6793
248.655	36.6165
248.543	36.8029
248.666	36.7248
247.946	36.765
247.147	37.1272
246.622	37.2498
245.397	37.661
244.519	38.1362
243.635	38.3815
243.032	38.6235
242.691	38.7811
242.124	39.0048
241.175	39.4627
239.876	40.4008
238.497	41.1391
238.734	40.4804
239.322	39.8502
238.933	39.7672
238.819	39.794
238.68	39.8977
238.751	39.9524
239.427	39.9875
239.846	40.1078
239.594	40.4426
240.078	41.7954
241.076	43.6294
240.47	44.1208
237.865	43.358
234.611	41.8438
233.561	41.003
231.698	39.7604
228.671	37.4498
227.436	36.5356
226.78	36.4517
226.523	36.4765
226.123	36.3924
225.656	36.3486
225.314	36.261
225.194	36.329
224.968	36.2166
224.822	36.2173
224.711	36.172
224.756	36.3081
224.722	36.2642
224.639	36.1972
224.385	36.1615
223.523	36.3567
223.166	36.4443
222.857	36.446
222.949	36.323
222.682	36.316
221.564	36.7812
221.279	36.721
220.47	37.0038
219.958	37.8013
218.763	38.0647
217.778	38.3109
217.124	38.3508
216.74	38.7233
216.093	38.8643
215.102	39.5296
213.528	40.3579
212.557	41.0234
213.047	40.0271
213.559	39.4358
212.958	39.5746
213.047	39.6597
212.782	39.7284
212.767	39.7738
213.146	39.732
213.596	39.9906
213.74	40.6836
214.259	42.1935
214.067	42.7187
212.672	42.9538
210.386	42.1831
208.352	41.1948
206.7	40.6652
205.374	39.7716
203.191	38.0575
200.686	36.0821
200.085	36.0096
199.874	35.9384
199.615	35.8756
199.164	35.8469
198.835	35.7159
198.894	35.7766
198.568	35.7455
198.356	35.7794
198.468	35.7316
198.365	35.7411
198.241	35.7383
198.162	35.6738
197.82	35.7031
197.093	35.8915
196.451	36.0809
196.198	35.9554
196.092	35.9578
196.104	35.9314
195.326	36.1227
194.425	36.2692
193.296	36.7248
192.363	37.2846
191.018	38.1595
190.537	38.4398
190.192	38.2249
189.542	38.3161
188.832	38.791
188.124	39.14
186.619	40.1133
185.725	40.8329
186.084	39.9723
186.641	39.2329
185.696	39.5653
185.916	39.4452
185.829	39.5207
186.299	39.4073
186.671	39.5007
186.507	39.4826
186.295	40.2434
186.933	41.7937
187.03	42.6827
185.37	42.6653
182.861	41.6101
180.948	40.7879
180.022	40.4521
177.584	39.0409
175.006	36.5425
173.704	35.7031
173.233	35.6399
172.942	35.68
172.45	35.4688
172.185	35.5738
171.688	35.3504
171.69	35.3768
171.468	35.3729
171.399	35.2857
171.413	35.2858
171.315	35.334
171.301	35.2746
171.215	35.4033
170.64	35.4725
169.922	35.5632
169.442	35.448
169.185	35.5682
169.417	35.6277
168.933	35.4147
168.129	35.7479
166.989	36.1185
165.906	36.5494
164.671	37.2233
163.803	38.001
163.243	37.8929
162.801	38.0331
162.254	38.3876
161.435	38.8628
159.833	39.7653
158.755	40.3564
159.199	39.5316
159.749	38.7263
159.345	38.876
158.974	38.7553
159.148	38.8232
159.2	38.8662
159.721	38.9477
160.154	39.1303
159.975	39.304
160.007	40.3942
160.752	41.8673
160.264	42.5849
158.132	42.0113
155.501	40.912
154.01	40.2397
152.539	39.4216
149.994	37.4574
147.252	35.4507
146.643	35.2559
146.724	35.3937
146.359	35.2556
145.792	35.1433
145.526	35.0857
145.426	35.0781
145.26	35.0353
145.046	34.9887
145.052	35.0219
145.103	34.9594
145.028	35.0533
144.932	34.9315
144.756	34.9349
143.993	35.1584
143.217	35.2714
142.894	35.1946
142.654	35.1819
142.7	35.2278
142.347	35.2304
141.552	35.4636
140.394	36.0382
139.514	36.3038
138.502	36.8181
137.696	37.2235
137.186	37.3428
136.578	37.5865
135.645	37.7808
135.087	38.3072
133.675	39.2959
132.52	40.0176
132.977	39.1073
133.439	38.519
132.884	38.5959
132.784	38.6785
132.686	38.7013
132.799	38.7073
133.1	38.7215
133.607	38.7594
133.092	38.9224
133.083	40.03
133.535	41.2061
132.899	41.8145
131.679	42.0301
129.446	41.2433
127.768	40.3982
126.788	40.0029
124.581	38.6168
122.113	36.1557
120.345	34.8906
119.689	34.9151
119.707	34.9986
119.152	34.733
118.845	34.7097
118.704	34.7178
118.605	34.7617
118.524	34.7826
118.428	34.7989
118.437	34.7632
118.351	34.7851
118.132	34.6061
117.821	34.6528
117.131	34.9088
116.365	34.9448
116.164	34.9945
116.031	35.0128
115.855	34.8832
115.165	34.9596
114.282	35.2437
113.233	35.5966
112.15	36.1
111.157	36.7216
110.632	36.8829
110.163	36.9452
109.424	37.1845
108.816	37.4459
107.758	38.1639
105.706	39.4487
105.141	39.7206
106.033	38.6922
106.528	38.0477
105.744	38.1353
105.681	38.1026
105.577	38.1669
105.849	38.3162
106.509	38.5093
106.376	38.3684
106.148	38.7694
106.688	40.3471
107.216	41.6856
106.382	41.9919
104.24	41.4525
101.67	40.3719
100.82	39.9298
98.9942	38.8168
96.6799	37.0088
93.7004	34.7037
93.05	34.3729
93.0377	34.5085
92.8669	34.5131
92.3267	34.3813
92.0527	34.3491
92.0417	34.4223
91.7839	34.3277
91.6674	34.2714
91.7333	34.2913
91.7845	34.3465
91.7226	34.2766
91.5903	34.1847
91.091	34.2366
90.3157	34.4686
89.9188	34.3826
89.1986	34.4217
89.0895	34.3408
89.0707	34.3449
88.2218	34.4687
87.1958	34.6993
86.1143	35.1557
85.1801	35.8333
84.0079	36.757
83.2858	36.8472
82.8564	36.7462
82.2169	37.1947
81.1963	37.8182
79.6828	38.6618
79.0013	39.055
79.2532	38.2291
80.1256	37.5369
79.3416	37.6143
79.0527	37.7711
79.228	37.7217
79.1771	37.7076
79.0214	37.8773
79.934	37.7984
79.8019	37.8521
80.2654	38.8676
81.2288	40.8386
81.76	42.0307
80.121	41.7027
76.8937	40.3839
74.6547	39.1403
73.1062	38.3055
70.6389	36.3528
67.7628	34.2151
67.0784	33.9233
66.9143	33.9983
66.718	33.9813
66.121	33.7925
65.8459	33.7608
65.8383	33.7864
65.6281	33.6799
65.3662	33.6595
65.3747	33.7191
65.4397	33.6444
65.445	33.7212
65.369	33.6881
65.08	33.5735
64.6248	33.7026
63.8142	33.8207
63.2632	33.8773
63.1692	33.7629
63.1007	33.7052
62.323	33.9224
61.6987	34.1187
60.6689	34.2892
59.6595	34.8
58.6785	35.4338
57.8286	36.0454
57.106	35.9508
56.6487	36.0787
55.9514	36.3456
55.0151	37.1127
53.5483	37.9129
52.7279	38.3066
53.1976	37.1739
53.572	36.962
52.9025	37.1049
52.9049	37.0805
52.5503	37.1364
52.5106	37.0682
52.8404	36.9855
53.5034	37.2144
53.2724	37.4325
53.7471	38.8331
54.6407	40.5142
54.3597	41.1566
52.7882	40.9276
50.1329	39.696
48.1269	38.6545
46.7289	37.8611
44.3661	36.1886
41.0984	33.657
40.1457	33.2065
40.1067	33.2284
40.0959	33.2301
39.288	33.0952
39.0653	33.0413
39.209	33.2071
38.9624	33.1046
38.6987	33.0447
38.7512	33.0062
38.6882	33.0516
38.6374	33.0626
38.5096	33.0682
38.3759	32.9291
37.5532	33.1756
36.8868	33.2607
36.3192	33.3052
36.2557	33.1911
36.1935	33.0884
35.6261	33.2309
34.5241	33.5561
33.3824	34.0479
32.355	34.5785
30.9896	35.5165
30.1767	35.911
29.7745	36.043
29.0535	36.3721
27.8133	37.1319
25.8571	38.1196
25.6772	38.2199
26.0873	37.5425
26.5696	36.7667
26.6524	36.2881
26.143	36.2267
25.8864	36.2728
25.836	36.2756
25.8852	36.3052
26.1775	36.3284
26.7586	36.3977
