# Supplementary material for: A Framework for Soft Mechanism Driven Robots
Source: Research Square preprint supplement (doi:10.21203/rs.3.rs-4109720/v1), 2024-03-28
Supplement: Supplementary file 2 [file xy_leg_coordinates_final_normalized.xlsx]

## Sheet: Sheet1
95A / 75D	95A / 75D	85A / 75D	85A / 75D	Vertical	Vertical	Wide	Wide	85A / 95A	85A / 95A
624.695	-357.219	652.849	-365.063	607.704	-364.785	622.371	-364.471	632.959	-355.747
624.816	-358.237	652.812	-364.919	607.413	-364.684	622.443	-364.4	632.788	-355.688
624.753	-358.212	653.055	-364.945	607.394	-364.8	622.3	-363.85	632.687	-355.796
624.651	-358.125	652.842	-364.878	607.146	-363.259	622.032	-363.505	632.802	-355.741
624.019	-358.14	653.206	-365.6	607.657	-363.953	622.386	-363.029	632.919	-355.792
623.638	-358.362	653.164	-365.667	608.773	-364.495	623.6	-362.96	632.989	-355.799
623.327	-357.673	653.184	-365.56	610.738	-363.955	625.467	-362.874	632.951	-355.799
623.011	-359.063	652.313	-364.748	611.672	-362.27	628.248	-362.8	632.798	-355.85
622.17	-358.91	653.086	-365.733	612.516	-364.545	629.289	-365.422	632.32	-355.79
621.034	-360.876	653.108	-365.99	610.976	-364.305	628.933	-365.822	631.06	-356.062
619.659	-364.976	653.209	-365.9	607.064	-364.447	627.791	-364.087	628.901	-355.944
617.764	-363.418	652.947	-365.657	602.234	-362.936	628.109	-365.055	625.966	-356.852
616.695	-364.684	653.362	-365.743	596.823	-358.96	628.609	-366	622.802	-359.324
617.11	-366.606	652.873	-364.971	591.792	-354.854	625.556	-362.6	619.408	-363.185
616.386	-368.193	649.522	-362.62	587.282	-351.788	626.68	-367.44	617.245	-365.307
615.672	-368.451	645.403	-360.197	584.427	-352.88	613.091	-352.945	615.597	-365.256
615.817	-369.669	641.354	-359.303	582.227	-355.813	628.844	-368.933	613.353	-364.88
615.895	-369.663	635.6	-357.839	579.178	-362.222	627.538	-368.8	612.152	-365.053
615.613	-368.133	630.968	-358.742	581.9	-357.1	616.545	-351.636	611.626	-365.007
615.788	-369.775	627.356	-359.411	579.169	-356	631.12	-365.36	611.716	-364.965
615.706	-369.788	623.631	-358.884	576.484	-358.842	628.347	-363.173	611.823	-364.736
615.445	-369.729	621.946	-360.054	573.54	-362.9	633.178	-367.356	611.84	-364.872
615.164	-369.6	618.693	-361.649	575.768	-359.474	625.92	-358.68	611.778	-364.943
615.87	-367.914	615.964	-366.568	575.788	-358.282	628.892	-364.738	611.614	-364.974
616.094	-369.671	615.169	-366.159	575.129	-357.741	625.582	-362.855	611.568	-365.274
615.8	-365.145	613.409	-366.314	573.484	-360.903	621.418	-360.727	611.429	-365.292
615.904	-367.632	612.528	-366.744	574.294	-360.565	616.74	-360.38	610.934	-365.16
615.926	-369.615	612.308	-366.222	572.897	-362.441	610.42	-357.1	610.503	-364.994
616.356	-367.6	612.499	-366.641	571.673	-363.145	608.8	-360.2	610.074	-364.897
615.319	-366.541	612.299	-366.251	570.286	-365	604.919	-360.652	609.627	-364.896
615.326	-366.326	612.117	-365.371	571.808	-362.838	599.304	-359.722	608.633	-364.683
615.758	-369.147	611.622	-365.213	570.439	-364.955	594.37	-360.933	607.834	-364.975
615.263	-367.363	611.414	-364.247	569.966	-364.497	589.714	-359.505	608.246	-365.147
615.541	-369.007	611.619	-365.962	569.85	-364.494	585.353	-361.132	608.089	-365.091
614.446	-365.092	611.816	-366.566	569.901	-364.449	580.649	-362.507	607.768	-365.114
615.2	-368.889	611.381	-366.462	569.35	-364.29	581.047	-363.77	608.07	-365.103
615.273	-368.9	610.905	-366.033	569.257	-363.776	580.082	-360.615	609.76	-365.236
614.956	-367.512	609.981	-364.771	570.085	-363.815	581.47	-361.86	610.439	-365.156
614.151	-366.46	609.791	-365.674	571.838	-363.838	583.456	-363.768	610.211	-365.011
615.2	-368.895	609.168	-365.058	572.903	-363.187	580.231	-362.708	609.29	-363.656
614.642	-367.382	610.407	-365.927	574.181	-363.737	579.662	-362.892	606.384	-360.818
615.565	-369.148	609.843	-365.702	572.24	-364.131	579.405	-362.892	602.087	-358.55
615.071	-367.548	610.041	-366.062	568.27	-363.292	579.422	-363.344	597.554	-357.154
615.618	-369.382	610.172	-365.994	563.93	-361.762	579.675	-363.325	593.151	-356.095
614.133	-366.613	611.264	-365.944	558.841	-358.875	579.789	-363.516	587.531	-355.585
617.04	-369.52	611.228	-365.503	554.017	-354.118	579.947	-364.065	582.215	-355.477
616.32	-367.76	608.211	-363.319	549.927	-351.176	579.803	-363.296	578.132	-356.723
611.305	-363.137	604.929	-361.477	546.334	-350.788	580.861	-363.678	573.902	-359.727
608.764	-361.535	600.8	-358.875	544.557	-352.607	581.221	-363.657	569.354	-364.055
605.306	-359.306	596.184	-358.276	543.061	-356.878	580.888	-363.766	567.774	-364.113
601.829	-359.691	591.74	-358.836	538.333	-363	580.916	-363.987	566.108	-364.173
599.2	-360.162	587.816	-359.117	536.55	-361.925	580.62	-364.39	562.996	-363.09
597.642	-359	583.376	-358.615	537.753	-358.859	580.892	-364.81	561.7	-363.603
596.075	-358.992	579.476	-359.324	537.435	-357.718	580.219	-365.2	561.65	-363.842
594.604	-359.481	577.46	-360.608	538.095	-355.429	579.694	-365.235	561.598	-363.843
592.607	-359.707	574.062	-365.004	536.552	-359.505	579.589	-365.817	561.673	-363.852
590.77	-361.685	572.729	-366.955	535.062	-363.038	579.2	-366.673	561.645	-363.905
588.8	-362.754	571.036	-366.834	535.786	-361.777	575.244	-362.356	561.747	-364.126
588.892	-369.108	569.163	-366.777	534.633	-361.642	580.667	-366.133	561.648	-364.214
587.45	-365.267	569.267	-366.427	532.844	-364.933	580.133	-366.133	561.54	-363.854
588.308	-369.292	569.368	-366.818	534.814	-360.871	577.68	-360.04	561.123	-363.02
586.933	-369.295	569.345	-366.9	533.389	-362.716	583.385	-364.985	561.092	-364.16
585.916	-364.168	569.335	-366.845	533.613	-362.323	587.229	-367.886	560.426	-363.763
586.133	-367.124	568.7	-366.182	533.329	-361.9	581.815	-360.092	559.91	-363.682
586	-369.327	568.728	-366.872	532.067	-363.483	581.025	-359.75	559.458	-363.626
586.88	-369.3	568.67	-365.716	531.983	-362.687	581.718	-363.741	558.392	-363.965
586.03	-368.889	568.205	-364.955	531.589	-364.48	576.887	-360.713	558.411	-364.097
585.646	-365.977	568.026	-365.527	531.216	-364.277	574.677	-361.631	558.8	-364.351
586.129	-368.659	568.067	-366.414	531.168	-364.238	569.747	-360.232	558.624	-364.393
586.026	-368.645	567.546	-366.301	532.145	-364.173	564.587	-359.338	558.273	-364.374
585.667	-368.667	566.837	-365.653	533.788	-364.154	560.093	-358.32	558.568	-364.404
585.86	-368.63	566.297	-365.921	535.279	-364.121	555.628	-357.693	559.671	-364.331
585.867	-368.971	565.497	-364.607	536.174	-363.487	550.034	-357.54	560.36	-364.056
586.697	-368.891	566.385	-365.721	536.159	-363.692	545.411	-357.375	561.117	-364.072
586.069	-368.8	566.288	-366.319	533.845	-363.79	540.617	-358.814	561.5	-364.237
586.17	-368.715	566.976	-366.631	529.622	-363.228	536.806	-362.211	560.292	-362.357
586.288	-368.463	567.586	-366.145	524.395	-361.147	534.57	-363.58	556.838	-359.678
586.478	-368.7	568.648	-366.083	519.273	-356.615	534.011	-363.223	552.266	-357.84
586.525	-367.758	567	-365.286	514.728	-353.061	534.214	-363.407	547.789	-356.78
586.546	-368.985	563.693	-362.449	511.018	-352.223	535.476	-363.091	542.303	-355.347
586.124	-368.829	560.693	-360.454	508.546	-352.888	536.128	-363.807	536.909	-354.495
586.109	-368.645	556.11	-358.602	505.359	-355.967	532.923	-362.608	532.144	-354.798
586.123	-368.738	551.229	-358.233	503.816	-360.616	532.713	-362.93	528.196	-356.234
585.916	-368.611	547.291	-358.581	499.009	-364.748	532.519	-362.655	523.907	-359.682
586.411	-368.442	543.099	-358.273	500.415	-360.222	532.888	-363.038	520.305	-363.682
585.962	-368.229	538.779	-356.949	497.906	-362.4	533.6	-362.737	519.055	-363.769
585.463	-367.083	535.729	-358.275	498.992	-360.4	533.524	-362.6	516.945	-363.413
585.968	-368.422	532.879	-360.974	501.414	-356.857	533.636	-362.669	514.25	-363.371
585.23	-366.904	529.681	-365.852	498.97	-360.376	533.791	-362.794	512.993	-363.483
585.029	-366.476	529.075	-366.97	500.272	-359.344	534.569	-362.61	512.963	-363.359
586.205	-368.703	527.447	-366.731	498.19	-361.505	534.438	-363.728	513.053	-363.338
585.116	-366.421	526.383	-367.067	496.471	-365.571	534.587	-363.476	513.125	-363.44
585.88	-366.31	526.106	-367.441	497.106	-364.612	534.335	-363.795	512.999	-363.593
587.114	-369.229	526.165	-367.172	496.887	-363.113	533.824	-364	513.013	-363.713
585.2	-365.36	525.929	-366.696	495.571	-365.356	534.131	-364.327	513.042	-363.691
583.463	-364.741	525.867	-367.168	496.504	-362.464	533.305	-364.467	513.03	-363.749
580.426	-361.821	525.488	-367.032	495.137	-364.769	533.047	-364.318	512.709	-363.233
577.591	-359.027	525.497	-366.654	494.717	-364.078	532.678	-363.911	512.212	-363.431
574.05	-358.833	525.171	-364.149	494.488	-364.671	531.168	-363.421	511.606	-363.422
571.637	-359.349	525.446	-367.234	494.261	-363.915	529.379	-360.326	511.041	-363.299
570.183	-358.325	524.862	-366.246	493.99	-364.43	533.618	-363.582	510.709	-363.333
568.359	-358.212	524.221	-365.959	494.2	-364.263	533.747	-363.44	509.76	-363.027
566.693	-358.647	523.33	-365.29	495.133	-364.419	534.622	-364.533	509.992	-363.458
564.63	-360.022	523.075	-365.782	496.233	-364.369	537.848	-365.81	510.37	-363.697
563.154	-362.662	523.403	-366.495	497.723	-364.39	539.667	-366.356	509.872	-363.534
561.558	-364.232	523.606	-366.8	498.476	-364.381	537.318	-361.718	509.887	-363.7
560.724	-367.557	522.836	-365.707	498.532	-364.289	535.083	-361.217	510.252	-363.671
560.136	-367.413	523.393	-366.987	495.541	-364.216	532.8	-362.48	511.23	-363.509
559.837	-367.689	523.415	-366.793	491.031	-363.38	530.05	-360.688	511.832	-363.51
558.985	-365.97	524.094	-365.677	485.85	-361.994	526.175	-359.675	512.715	-363.463
558.545	-366.245	524.1	-365.367	481.01	-357.22	521.649	-358.683	512.492	-362.93
558.046	-365.806	521.953	-364.793	476.883	-352.829	516.723	-357.452	510.455	-360.337
557.776	-366.185	518.844	-362.411	473.881	-350.577	512.427	-357.593	506.668	-357.965
557.574	-362.2	515.51	-360.365	470.152	-354.315	507.3	-357.838	502.52	-357.024
557.956	-367.289	510.303	-357.71	466.848	-359.319	501.947	-357.326	497.769	-355.181
557.981	-366.352	505.222	-357.131	464.267	-364.158	497.753	-358.845	492.709	-354.086
557.84	-368.48	501.431	-358.626	463.319	-362.579	493.379	-361.085	487.422	-353.358
557.633	-368.433	497.157	-357.854	462.662	-360.634	489.359	-364.188	482.763	-353.394
557.715	-368.485	493.229	-358.333	459.435	-365.294	489.132	-364.116	478.995	-355.395
557.922	-368.525	490.351	-360.302	461.6	-361.048	489.803	-364.522	474.608	-359.114
558.369	-368.361	487.477	-364.136	462.362	-362.724	489.969	-364.008	471.346	-363.183
558.156	-367.467	485.624	-367.648	460.558	-363.537	490.177	-363.621	470.4	-363.532
557.835	-368.478	484.471	-367.534	460.485	-364.277	488.149	-363.02	468.12	-362.849
557.6	-368.565	482.063	-366.701	461.164	-363.36	487.157	-362.773	465.714	-362.838
557.867	-368.382	482.067	-367.852	461.472	-362.053	487.42	-363.217	464.745	-362.772
557.727	-368.39	481.976	-367.125	461.991	-360.365	487.481	-363.151	464.716	-362.775
557.659	-368.527	481.856	-367.648	459.21	-363.356	487.528	-363.176	464.655	-363.016
557.487	-368.226	481.768	-367.738	458.535	-364.868	487.821	-362.824	464.98	-362.633
557.124	-365.867	481.592	-367.589	458.081	-365.381	487.938	-362.815	464.869	-362.907
557.809	-368.236	481.445	-367.553	457.651	-365.076	487.788	-362.865	464.789	-363.218
557.331	-367.353	481.761	-367.546	457.688	-365.094	488.436	-363.025	464.57	-363.122
557.223	-368.323	481.59	-367.615	457.216	-365.005	489.337	-363.592	464.525	-363.066
557.422	-368.03	481.338	-367.559	457.067	-364.805	489.554	-363.483	464.267	-363.047
557.131	-368.152	480.944	-367.387	457.2	-364.362	489.266	-363.793	463.666	-362.919
556.98	-368.261	480.564	-367.251	457.6	-364.978	488.681	-363.847	463.293	-362.961
557.51	-368.46	480.041	-367.125	458.688	-364.423	488.476	-363.644	462.886	-363.025
557.381	-368.581	479.441	-366.706	460.095	-364.31	488.167	-363.099	462.265	-362.783
557.326	-368.331	479.479	-366.457	461.299	-364.858	487.728	-363.683	461.766	-362.947
556.937	-368.337	479.713	-367.4	461.609	-364.929	487.341	-363.424	461.778	-362.876
557.567	-368.511	479.267	-367.148	460.627	-364.795	486.897	-363.429	462.111	-363.154
558.306	-368.471	479.744	-367.095	456.782	-363.865	485.722	-362.793	461.602	-363.174
558.333	-368.322	480.368	-367	451.797	-363.706	487.128	-363.713	461.777	-363.204
556.485	-366.57	481.74	-366.651	446.826	-359.879	487.879	-362.66	462.023	-362.86
553.747	-363.695	480.604	-366	442.205	-356.791	489.545	-362.604	463.304	-363.113
551.413	-360.062	477.797	-363.803	437.936	-352.784	491.571	-363.757	463.941	-362.96
547.728	-358.213	475.048	-361.825	435.184	-352.497	493.352	-363.714	464.654	-362.992
544.385	-358.792	471	-359.94	431.01	-355.756	494.167	-363.756	464.2	-362.355
542.148	-358.615	465.676	-359.423	428.895	-361.673	492.908	-362.789	462.013	-359.772
540.662	-357.423	461.407	-359.694	426.052	-364.47	489.38	-361.567	458.214	-357.829
538.838	-358	457.041	-359.455	427.188	-360.824	484.575	-357.458	453.873	-356.32
536.669	-358.319	452.672	-358.41	422.741	-365.588	482.4	-359.547	449.069	-354.65
534.874	-358.226	449.284	-358.363	424.151	-363.751	479.048	-358.672	443.957	-354.058
533.926	-362.332	446.851	-361.112	422.64	-364.693	474.224	-357.741	438.585	-353.98
532.384	-367.233	443.693	-364.925	423.609	-363.236	469.606	-356.714	434.097	-355.105
531.989	-364.443	441.908	-368.216	423.191	-364.363	464.897	-356.901	430.415	-357.88
532.133	-368.867	441.256	-367.637	422.908	-364.65	459.075	-356.441	425.776	-362.538
530.096	-360.368	439.51	-367.946	424.846	-361.462	454.118	-357.498	424.243	-363.4
530.345	-368.018	439.073	-368.518	424.286	-359.867	450.679	-359.004	423.115	-363.343
530.453	-366.48	439.314	-368.352	424.391	-360.573	445.95	-361.383	419.371	-362.543
530.055	-366.073	439.22	-368.444	422.708	-363.528	443.408	-363.615	417.811	-363.022
529.157	-366.584	438.954	-368.424	421.612	-365.112	443.545	-363.345	417.458	-363.135
528.676	-366.686	438.816	-368.364	420.952	-365.662	443.971	-363.296	417.473	-362.999
528.633	-365.717	438.585	-368.343	420.119	-365.73	444.404	-363.54	417.558	-362.892
528.569	-367.954	438.644	-368.684	420.047	-365.135	444.641	-363.305	417.594	-362.837
528.785	-367.97	438.444	-368.604	419.922	-365.104	442.126	-362.957	417.502	-362.892
529.063	-368.042	438.205	-367.632	419.562	-365.477	442.034	-362.8	417.503	-363.172
529.116	-368.182	437.57	-367.687	419.371	-365.467	442.262	-363.318	417.464	-363.084
529.114	-368.121	436.88	-367.562	419.796	-365.443	441.939	-362.791	417.304	-363.043
529.024	-368.115	437.041	-367.575	421.117	-364.95	442.205	-363.133	416.94	-362.87
529.118	-368.229	436.274	-368.147	422.558	-364.264	442.343	-363.033	416.512	-362.856
528.966	-366.204	436.643	-368.151	423.503	-364.409	442.774	-362.8	416.011	-362.843
528.431	-365.162	436.393	-368.027	423.052	-363.924	443.568	-362.874	415.402	-362.716
528.43	-366.73	436.293	-368.071	420.424	-364.059	444.089	-363.137	414.73	-362.619
528.236	-366.855	436.791	-367.8	416.308	-364.378	443.977	-363.308	414.572	-362.814
528.438	-367.854	438.133	-367.524	411.313	-362.369	443.579	-363.145	414.662	-362.756
528.571	-367.82	438.623	-367.526	406.452	-358.239	443.2	-363.289	414.791	-362.955
527.783	-365.7	436.809	-366.902	401.851	-355.431	442.545	-362.826	414.288	-362.838
528.164	-367.945	433.79	-364.169	398.532	-352.395	442.835	-362.8	414.591	-362.938
528.365	-367.705	430.576	-362.498	394.606	-354.522	442.508	-362.946	415.28	-362.9
528.31	-367.641	425.805	-360.81	391.062	-359.231	442.203	-362.851	416.511	-362.849
528.01	-367.47	420.755	-359.927	390.638	-363.115	441.141	-362.741	417.126	-362.883
527.71	-366.19	416.435	-361.17	388.297	-364.777	441.013	-363.055	417.496	-362.689
528.294	-367.718	412.155	-360.66	386.542	-365.033	440.759	-362.945	416.352	-361.086
527.968	-367.888	407.962	-360.248	383.75	-366.567	441.953	-363.1	413.534	-358.614
528.043	-367.843	404.839	-361.127	384.158	-366.1	443.905	-363.789	409.353	-356.68
527.931	-367.917	401.983	-364.091	385.4	-364.573	444.656	-362.88	404.778	-355.518
528.16	-367.867	399.158	-368.716	385.968	-364.16	446.545	-363.982	399.891	-354.276
528.4	-367.867	398.695	-368.794	386.439	-363.355	447.782	-363.347	394.686	-354.239
529.093	-366.615	396.186	-368.7	388.483	-358.15	447.078	-362.122	389.62	-354.662
529.042	-367.505	395.451	-369.189	385.582	-360.845	445.502	-361.486	385.661	-356.1
527.374	-366.513	395.318	-369.059	384.908	-363.467	441.991	-360.252	381.304	-358.948
524.991	-363.104	395.214	-369.139	383.302	-366.298	439.105	-359.526	377.787	-362.98
521.98	-359.366	395.243	-369.1	383.729	-365.671	435.195	-358.678	376.446	-363.394
518.183	-357.765	395.246	-368.914	383.451	-365.62	431.033	-358.102	374.117	-363.031
515.17	-358.113	394.828	-368.842	382.406	-366.137	426.395	-357.851	371.742	-362.854
512.94	-357.905	394.877	-368.908	381.69	-366.315	421.774	-356.535	370.521	-362.872
511.207	-356.667	394.805	-369.259	381.463	-366.349	416.381	-356.531	370.317	-362.92
510.239	-356.47	394.71	-369.026	381.34	-366.208	410.566	-356.662	370.184	-362.834
508.566	-356.64	394.577	-368.689	381.214	-366.255	406.791	-358.238	370.331	-362.676
506.577	-358.377	393.993	-368.512	381.774	-366.249	402.411	-360.732	370.287	-362.674
505.243	-361.011	393.376	-368.712	382.945	-366.14	398.807	-363.167	370.344	-362.755
504.008	-364.735	393.286	-368.162	384.05	-366.25	398.574	-363.129	370.35	-362.886
503.45	-368.062	392.937	-368.158	384.96	-366.213	398.89	-363.333	370.19	-362.835
502.667	-368.219	393.083	-368.634	385.459	-366.174	399.468	-363.633	370.114	-362.855
502.956	-368.205	393.011	-368.421	385	-366.067	400.667	-363.115	369.628	-362.898
502.183	-368.142	392.973	-368.8	381.33	-365.351	397.732	-363.127	369.191	-362.93
501.551	-368.155	393.444	-368.488	376.651	-365.154	396.921	-363.174	368.776	-362.841
501.517	-367.959	394.729	-368.247	371.537	-362.616	397.078	-363.498	368.101	-362.777
500.865	-368.114	394.705	-368.147	366.805	-357.692	397.306	-363.049	367.513	-362.833
501.043	-365.613	391.763	-366.467	363.061	-354.727	397.27	-362.97	367.443	-362.868
500.926	-367.963	388.831	-364.562	359.25	-354.28	397.495	-362.834	367.582	-363.043
500.965	-367.879	384.955	-362.352	355.8	-356.234	397.507	-362.829	367.497	-362.965
500.969	-367.81	379.958	-360.874	352.733	-362.726	397.606	-362.591	367.235	-362.966
501.029	-367.871	375.506	-361.454	351.804	-364.622	397.954	-362.797	367.379	-362.965
501.03	-367.904	371.271	-361.949	348.011	-367.922	398.587	-362.939	368.192	-362.979
500.879	-367.908	366.396	-361.389	349.471	-363.918	398.461	-363.02	368.933	-362.951
501.082	-368.118	362.068	-361.275	346.514	-368.147	398.45	-363.261	369.772	-362.93
500.965	-368.183	359.819	-362.563	347.638	-365.775	397.944	-363.048	369.776	-362.895
500.644	-368.027	356.726	-367.067	346.915	-366.444	397.751	-363.157	368.464	-361.311
500.818	-366.269	355.042	-369.893	347.469	-365.672	397.486	-363.252	364.986	-358.976
500.423	-363.287	354.693	-369.758	349.069	-363.966	397.156	-363.456	360.973	-357.534
500.644	-367.037	352.933	-369.595	346.86	-366.519	396.435	-363.451	356.427	-356.01
500.707	-365.986	352.138	-370.178	346.166	-366.634	396.028	-363.32	351.45	-355.071
500.961	-367.774	352.054	-370.088	345.982	-366.733	395.792	-363.641	346.271	-354.906
500.611	-366.751	352.047	-370.122	345.873	-367.042	395.467	-363.089	341.434	-355.019
500.452	-367.672	351.846	-369.446	344.733	-368.467	397.273	-362.989	337.3	-356.417
499.9	-364.559	351.852	-369.913	344.431	-367.84	398.671	-362.935	333.302	-359.927
500.318	-367.371	351.719	-369.873	344.416	-367.072	399.957	-362.85	330.441	-363.52
499.252	-363.928	351.639	-370.023	343.662	-367.323	401.627	-362.929	328.912	-363.317
499.843	-366.636	351.65	-370.273	343.363	-367.428	402.385	-362.563	326.385	-363.185
499.768	-366.161	351.285	-370.075	343.537	-367.459	401.377	-361.606	324.137	-363.072
499.992	-366.952	350.958	-369.773	343.162	-367.285	398.883	-360.8	323.037	-363.337
500.252	-367.904	350.421	-369.667	343.67	-367.422	395.875	-359.648	323.017	-363.218
500.08	-366.936	349.9	-368.314	344.595	-367.398	392.529	-359.212	323.118	-363.122
501.117	-367.925	349.648	-369.59	345.953	-367.259	388.595	-358.626	323.21	-363.083
501.617	-365.779	349.494	-369.943	346.954	-367.212	383.765	-358.169	323.218	-363.159
501.742	-365.716	349.69	-370.033	347.357	-367.085	379.404	-357.531	323.261	-363.177
501.167	-367.144	349.442	-369.814	345.276	-367.068	374.227	-357.114	323.094	-363.38
500.249	-365.146	349.713	-370.021	341.263	-366.771	368.361	-356.99	323.065	-363.323
496.7	-361.336	348.886	-366.876	336.047	-364.926	362.728	-357.4	322.713	-363.35
493.723	-358.369	351.689	-369.985	330.906	-361.433	359.159	-359.644	322.32	-363.344
490.214	-357.823	350.465	-369.381	326.357	-358.039	355.07	-361.828	321.819	-363.062
487.254	-358.963	347.343	-367.236	322.553	-356.072	352.513	-364.205	321.482	-363.185
484.949	-357.869	344.368	-364.616	318.967	-356.967	352.449	-364.205	320.834	-363.192
483.456	-357.672	339.741	-363.265	315.2	-360.486	353.103	-363.767	320.163	-363.052
481.951	-358.474	334.79	-362.205	316.154	-365.246	353.362	-363.827	320.073	-363.198
479.68	-359.815	330.208	-362.869	310.676	-367.034	354.408	-363.263	320.348	-363.27
478.419	-362.444	325.582	-362.094	311.061	-365.009	350.914	-363.505	320.139	-363.303
476.744	-367.568	320.544	-362.903	309.238	-366.853	350.969	-363.534	319.924	-363.244
476.12	-365.267	317.209	-364.145	307.417	-368.275	351.019	-363.619	320.235	-363.234
474.552	-368.229	314.49	-366.099	306.756	-368.347	351.188	-363.234	321.29	-363.234
475.122	-365.93	311.283	-369.972	308.065	-366.895	352.285	-363.355	322.237	-363.208
474.137	-368.149	310.412	-370.758	307.514	-367.647	352.586	-363.351	322.571	-363.044
474.108	-368.125	307.206	-370.83	307.621	-367.097	352.505	-363.408	322.248	-362.585
473.394	-368.348	306.66	-371.164	306.528	-368.624	353.105	-363.355	320.435	-360.595
473.133	-367.25	306.4	-371.09	305.535	-369.348	353.897	-363.434	316.556	-357.839
472.941	-368.173	306.483	-371.076	305.582	-369.218	354.563	-363.345	312.412	-356.885
472.913	-366.875	306.4	-371.186	305.217	-369.108	354.708	-363.982	307.693	-355.616
472.725	-368.108	306.252	-370.881	305.052	-369.237	354.545	-363.445	302.292	-355.134
472.725	-367.986	305.968	-370.886	304.674	-368.921	354.412	-363.498	297.175	-355.317
472.819	-367.956	305.867	-370.811	304.23	-368.752	353.826	-363.483	292.01	-356.166
472.553	-368.02	305.758	-371.242	304.312	-368.625	353.667	-362.948	288.137	-358.034
472.664	-367.119	305.594	-371.229	303.972	-368.558	353.518	-363.551	283.911	-362.242
472.785	-367.992	305.141	-370.059	303.808	-368.404	352.955	-363.832	282.345	-363.68
472.768	-368.07	304.874	-370.763	303.831	-368.385	352.085	-363.685	280.753	-363.961
472.939	-368.103	304.394	-370.856	304.564	-368.447	352.085	-364.198	277.387	-363.45
472.885	-368.012	304.208	-370.872	305.709	-368.291	351.112	-362.472	275.46	-363.632
472.483	-367.06	303.405	-370.623	306.946	-368.327	353.77	-364.135	274.751	-363.628
472.652	-367.877	303.611	-370.916	307.757	-367.687	355.851	-364.137	274.917	-363.682
472.529	-367.91	303.849	-370.782	307.467	-367.761	356.731	-364.183	274.802	-363.53
472.443	-367.94	303.622	-370.584	304.208	-368.038	357.636	-364.115	275.018	-363.68
472.328	-366.888	304.074	-370.811	299.528	-366.251	357.575	-363.542	274.963	-363.663
472.506	-367.935	304.679	-370.848	294.219	-364.126	356.623	-362.653	275.028	-363.909
472.106	-366.755	305.2	-370.318	289.967	-361.41	353.936	-361.476	274.729	-363.549
472.253	-367.573	302.578	-368.678	284.602	-359.843	350.026	-359.898	274.76	-363.719
471.435	-364.265	299.864	-367.14	280.938	-358.79	346.087	-359.203	274.412	-363.924
471.688	-365.694	296.169	-364.213	277.125	-360.1	342.206	-358.714	273.98	-363.775
471.731	-366.462	291.087	-363.194	274.4	-364.528	337.041	-358.638	273.421	-363.518
471.577	-364.808	286.302	-363.346	270.955	-369.739	332.397	-358.327	273.067	-363.685
471.872	-365.92	281.956	-364.056	268.449	-369.878	327.064	-358.216	272.43	-363.676
472.038	-366.913	276.786	-363.371	267.455	-370.303	321.693	-358.521	271.649	-363.523
471.879	-366.819	272.389	-363.411	266.391	-370.227	317.164	-359.289	271.633	-363.782
472.485	-365.796	269.639	-364.761	265.526	-370.586	312.692	-361.189	271.902	-363.818
473.562	-365.419	266.387	-367.321	265.364	-370.6	308.397	-364.356	271.715	-363.727
474.108	-367.717	263.353	-371.713	265.412	-370.341	308.044	-364.69	271.667	-363.945
472.093	-366.733	262.986	-371.938	265.394	-370.331	308.219	-364.429	271.741	-363.51
470.722	-364.02	260.691	-371.32	265.535	-370.763	308.611	-364.432	272.905	-363.813
467.818	-360.882	259.894	-371.847	265.233	-370.378	310.41	-364.089	273.638	-363.835
464.486	-358.314	259.984	-371.919	267.503	-369.005	307.665	-363.634	274.031	-363.687
460.936	-358.498	260.005	-371.858	264.962	-370.486	306.32	-364.386	273.59	-363.295
458.332	-358.271	259.965	-371.154	264.619	-370.694	306.4	-364.412	271.394	-361.414
456.627	-356.4	259.571	-371.872	264.679	-370.364	306.395	-364.376	267.447	-359.183
455.348	-356.09	259.3	-372.006	264.097	-370.072	306.437	-364.015	263.092	-358.074
453.266	-356.621	259.057	-372.114	264.293	-368.812	306.751	-363.761	258.319	-356.703
451.63	-358.484	259.108	-372.157	263.676	-369.192	307.077	-363.737	253.002	-356.451
450.08	-361.428	259.011	-371.913	263.562	-369.362	307.135	-363.784	247.333	-356.595
448.654	-366.254	258.671	-371.857	263.197	-369.838	307.615	-363.812	242.626	-357.056
447.776	-368.41	257.877	-371.145	262.96	-369.61	309.043	-364.05	238.833	-359.341
447.211	-368.434	257.652	-370.116	263.593	-369.124	309.288	-364.008	234.504	-363.83
446.661	-368.174	257.438	-371.745	265.802	-368.191	308.978	-364.16	233.12	-364.947
445.853	-368.413	256.991	-370.682	266.433	-369.464	308.719	-364.226	231.915	-364.774
445.661	-368.17	257.326	-372.189	266.887	-368.833	308.318	-364.318	227.92	-364.327
445.328	-368.06	257.473	-371.902	265.2	-369.208	308.447	-364.301	226.135	-364.52
445.312	-368.216	256.765	-370.212	261.549	-367.756	307.74	-364.024	225.794	-364.648
445.408	-368.216	258.19	-372.362	255.819	-366.761	306.994	-363.994	225.817	-364.45
445.463	-368.138	258.514	-372.114	250.612	-363.712	306.382	-364.025	225.834	-364.338
445.357	-368.11	257.771	-371.524	246.981	-360.146	305.937	-364.205	225.86	-364.363
444.94	-368.112	255.111	-369.233	243.639	-359.26	306.011	-364.27	225.874	-364.46
444.792	-368.146	252.075	-367.342	238.677	-360.627	306.777	-364.767	225.831	-364.59
444.562	-368.196	247.816	-364.248	234.468	-363.896	308.296	-364.666	225.609	-364.584
444.962	-368.131	242.597	-362.215	231.735	-369.626	309.698	-364.606	225.58	-364.649
445.142	-367.342	238.029	-364.765	229.679	-369.214	311.139	-364.621	225.318	-364.604
444.755	-368.189	232.865	-364.994	227.938	-369.231	312.206	-364.532	224.928	-364.556
444.585	-368.154	227.6	-364.6	224.4	-371.6	311.094	-362.709	224.269	-364.471
445.048	-367.981	223.877	-364.811	223.482	-371.682	309.871	-362.413	223.809	-364.451
444.837	-367.969	220.933	-367.247	223.074	-371.758	306.406	-361.316	223.288	-364.479
444.966	-367.251	217.057	-371.267	223.112	-371.832	302.709	-360.391	222.782	-364.318
444.968	-367.919	216.483	-370.453	223.226	-371.872	298.842	-359.789	222.498	-364.471
444.953	-367.901	214.323	-372.254	225.163	-370.233	293.597	-359.022	222.865	-364.71
445.029	-367.906	212.061	-372.441	224.549	-370.407	289.243	-359.502	222.468	-364.711
444.782	-367.091	211.986	-372.644	223.927	-370.24	284.169	-359.178	222.256	-363.948
444.677	-367.877	213.267	-371.461	224.771	-369.252	278.403	-358.913	222.65	-363.799
444.516	-367.813	213.458	-370.488	222.578	-372.17	272.861	-359.409	224.144	-363.463
444.3	-367.662	212.029	-372.255	224.114	-371.111	268.498	-360.798	225.249	-364.5
444.148	-367.711	212.767	-371.828	221.988	-371.548	264.09	-362.869	225.519	-364.46
444.114	-367.69	211.594	-372.286	221.631	-371.276	261.185	-365.104	224.866	-363.428
444.374	-367.796	211.575	-371.117	221.837	-370.769	261.079	-364.833	221.158	-361.357
444.267	-367.804	211.905	-369.2	221.348	-371.134	261.349	-364.791	217.087	-359.078
444.612	-367.673	212.8	-368.393	221.516	-370.484	262.126	-364.942	212.516	-358.342
444.47	-367.839	211.14	-368.913	221.054	-370.923	262.849	-364.893	207.179	-357.42
444.118	-363.445	210.651	-369.859	221.365	-370.831	259.026	-364.992	201.45	-356.902
445.978	-366.218	209.877	-372.8	222.723	-369.796	258.867	-365.228	196.042	-357.176
445.58	-366.854	209.451	-370.18	224.194	-369.916	258.767	-365.018	191.854	-358.603
444.256	-366.312	209.363	-372.385	224.984	-370.145	258.779	-364.834	187.531	-361.251
442.43	-363.494	209.7	-372.433	224.905	-370.52	258.92	-364.933	183.649	-364.828
439.741	-360.359	209.634	-372.423	223.468	-369.723	258.718	-364.937	182.316	-365.413
435.846	-358.431	209.807	-372.566	219.611	-368.477	258.547	-364.846	180.139	-365.061
432.361	-358.871	210.384	-372.624	214.082	-366.089	258.919	-364.529	177.045	-365.165
430.081	-358.886	211.23	-372.83	209.111	-361.919	259.832	-364.757	175.627	-365.129
428.394	-357.055	210.484	-372.042	204.162	-359.457	260.741	-364.955	175.631	-364.963
426.702	-357.127	209.737	-368.078	199.45	-360.081	260.785	-365.021	175.451	-365.075
424.933	-356.957	205	-366.947	194.81	-363.2	260.44	-364.933	175.547	-364.872
423.478	-357.82	198.725	-365.725	190.96	-367.891	260.161	-364.915	175.571	-364.904
422.021	-359.931	194.527	-363.829	189.346	-370.015	259.895	-364.968	175.463	-365.213
420.889	-363.676	188.729	-365.374	187.244	-369.644	259.524	-365.085	175.533	-365.15
420.092	-368.523	184.086	-365.929	188.553	-367.4	258.901	-365.157	175.523	-364.995
419.12	-368.609	179	-365.029	187.375	-366.255	258.288	-365.131	175.412	-365.234
418.939	-368.6	175.557	-364.907	183.741	-370.259	257.483	-365.471	175.583	-364.23
418.97	-368.649	172.912	-366.419	185.588	-365.803	257.185	-365.287	174.244	-364.938
418.673	-368.6	168.8	-370.554	186.19	-365.252	257.226	-365.315	173.716	-364.989
418.02	-368.531	168.085	-372.079	184.435	-367.53	258.699	-365.366	173.188	-365.006
418.014	-368.481	166.007	-372.509	185.004	-368.253	260.41	-365.361	172.624	-364.929
418.049	-368.449	163.796	-372.868	183.639	-368.69	261.924	-365.296	172.079	-365.081
417.894	-368.569	165.383	-366.644	184.451	-370.011	263.01	-365.414	172.161	-365.163
417.93	-368.349	163.807	-372.893	182.748	-371.213	263.481	-364.532	172.236	-365.277
417.858	-368.433	163.971	-371.821	180.073	-372.845	262.365	-363.818	172.034	-364.93
417.8	-367.552	164.187	-370.819	181.678	-372.255	260.019	-362.937	172.25	-364.904
417.713	-367.653	163.333	-372.557	180.283	-371.912	256.194	-361.466	172.356	-365.099
417.586	-368.611	163.54	-371.379	179.359	-372.244	252.492	-360.917	173.709	-365.107
417.748	-368.455	163.067	-372.943	179.426	-371.419	248.565	-360.582	173.983	-365.13
417.539	-368.497	164.22	-367.77	180.995	-370.684	243.944	-360.293	174.193	-364.94
417.533	-368.491	163.722	-368.304	180.212	-370.41	238.959	-359.833	173.132	-364.349
417.363	-368.406	162.708	-371.087	179.969	-370.959	233.087	-359.408	169.512	-361.839
417.34	-368.493	162.013	-372.763	179.671	-370.645	227.259	-359.659	165.171	-360.138
417.508	-368.308	161.635	-373.071	182.461	-369.176	222.321	-360.287	160.371	-358.894
417.303	-368.303	161.303	-373.329	182.96	-370.259	217.519	-362.102	154.87	-357.903
417.155	-367.213	161.006	-373.248	183.73	-369.959	212.918	-365.35	149.626	-357.329
417.432	-368.161	161.304	-373.252	184.08	-370.198	211.879	-365.905	144.571	-357.413
417.279	-368.085	161.354	-373.323	181.944	-368.822	211.971	-365.847	140.507	-358.2
417.176	-368.024	161.84	-373.56	175.146	-370.499	212.482	-365.691	135.748	-361.092
416.935	-368.032	161.556	-373.022	169.969	-367.782	214.097	-365.821	131.734	-365.839
416.817	-367.834	162.748	-372.817	164.084	-366.209	211.478	-365.244	130.247	-365.295
416.771	-368.029	160.954	-371.815	159.641	-363.048	209.506	-365.68	128.325	-365.893
416.814	-368.344	157.52	-369.166	155.398	-361.494	209.395	-365.826	126.09	-365.866
416.676	-368.489	153.746	-367.151	151.757	-362.178	209.415	-365.659	124.397	-365.86
416.967	-368.356	148.442	-363.663	147.76	-367.75	209.769	-364.838	124.267	-365.757
416.951	-368.295	143.583	-363.539	148.262	-368.815	209.73	-365.528	124.436	-365.885
416.963	-367.471	139.585	-362.689	147.575	-368.45	209.794	-365.426	124.456	-365.947
417.784	-365.777	133.973	-364.622	141.592	-371.962	209.738	-365.371	124.517	-365.949
418.455	-368.31	129.546	-364.715	140.853	-371.747	210.191	-365.45	124.488	-365.927
418.235	-367.965	126.831	-365.462	138.84	-372.94	211.546	-365.664	124.441	-365.964
416.547	-366.72	122.693	-369.511	139.608	-371.898	212.61	-365.756	124.308	-366.042
414.573	-363.459	119.986	-373.457	139.146	-372.161	214.134	-365.771	124.071	-366.121
411.935	-360.4	118.6	-373.307	143.638	-368.555	213.788	-365.302	123.591	-365.838
408.443	-358.174	119.162	-370.229	139.656	-371.944	213.682	-365.646	122.995	-365.597
404.943	-358.702	115.751	-373.502	139.958	-371.451	213.315	-365.649	122.709	-365.426
402.234	-358.966	115.292	-373.446	139.664	-371.722	212.827	-365.713	121.929	-365.622
400.476	-357.432	115.438	-373.362	138.547	-372.288	211.814	-365.267	121.075	-365.561
399.267	-357.6	117.208	-372.03	137.389	-373.754	211.418	-366.038	120.988	-365.722
397.76	-357.735	115.337	-373.105	141.867	-370.79	210.126	-365.296	121.345	-365.484
396.119	-359.119	114.983	-372.891	139.266	-372.171	210.018	-364.977	121.031	-365.766
394.911	-362.328	114.8	-373.138	136.36	-372.774	209.954	-364.123	120.639	-365.03
393.702	-366.781	114.74	-373.1	139.078	-370.668	211.635	-365.241	120.842	-365.081
393.671	-367.6	114.411	-373.233	138.092	-370.881	214.041	-365.69	121.701	-365.023
392.393	-368.891	114.32	-373.133	136.872	-371.731	214.968	-366.021	122.74	-364.815
391.976	-368.685	113.733	-373.28	136.715	-371.704	215.507	-365.781	122.921	-363.66
391.935	-367.935	113.381	-371.019	137.542	-371.156	215.017	-364.944	123.818	-364.42
390.959	-368.772	113.2	-373.241	137.641	-371.673	213.699	-363.225	121.527	-363.575
390.973	-368.863	112.637	-371.052	140.025	-371.119	211.85	-363.531	117.084	-360.934
390.74	-368.709	114.017	-365.883	139.749	-371.586	207.358	-361.493	112.721	-359.814
390.9	-368.706	114.338	-361.692	138.178	-371.946	203.261	-360.984	107.397	-359.196
390.575	-368.833	114.35	-362	135.723	-370.482	199.443	-360.68	101.518	-358.365
390.528	-368.8	114.422	-362.978	130.467	-369.356	194.285	-361.129	95.9322	-358.397
390.463	-368.933	114.776	-362.353	124.979	-367.138	188.835	-361.069	91.069	-358.956
390.63	-368.896	115.7	-358.7	118.594	-364.378	182.813	-360.841	86.486	-360.943
390.531	-368.855	113.25	-356.35	114.713	-361.01	177.198	-361.116	81.935	-365.043
390.662	-368.82	108.267	-369.3	110.935	-360.519	172.706	-361.422	79.9663	-367.049
390.714	-368.806	103.97	-366.741	106.118	-363.305	168.013	-363.112	79.1923	-367.071
390.542	-368.839	99.2667	-363.629	102.621	-370.028	163.578	-366.809	75.1642	-366.463
390.432	-367.871	95.7463	-361.346	106.341	-368.02	163.17	-366.653	72.6212	-366.815
390.262	-368.676	91.0778	-361.433	107.806	-366.312	163.506	-366.51	72.2046	-366.842
390.386	-367.817	85.4421	-362.758	101.034	-371.743	164.152	-366.527	72.1367	-366.796
390.394	-367.852	81.5304	-363.591	105.422	-365.393	165.333	-366.201	72.1693	-366.818
390.252	-368.542	76.8889	-367.538	97.7795	-371.405	160.821	-365.643	72.2111	-366.652
390.254	-368.496	73.0788	-370.606	97.3039	-371.023	160.429	-366.391	72.1487	-366.843
390.178	-367.706	70.9263	-374.084	94.6643	-374.479	160.487	-366.267	72.1398	-366.662
390.127	-368.406	77.7333	-369.567	98.1	-372.395	160.44	-366.209	71.9822	-366.962
390.023	-368.4	67.2632	-373.568	99.5862	-371.278	160.509	-366.065	71.9293	-366.671
389.663	-368.565	67.1613	-373.69	95.4429	-373.648	160.3	-366.138	72.1296	-366.682
389.581	-368.439	67.38	-372.16	94.3347	-374.559	160.411	-366.205	71.2794	-366.622
389.636	-368.386	67.928	-371.184	94.963	-372.751	160.419	-366.014	70.623	-366.591
389.44	-368.693	67.5333	-372.229	97.5892	-371.951	161.518	-366.151	70.2357	-366.452
389.693	-368.721	67.8632	-370.179	94.1495	-374.062	162.578	-366.333	69.5796	-366.532
389.585	-368.654	67.1333	-371.333	92.2784	-374.216	164.252	-366.605	68.716	-366.207
389.554	-368.623	66.8118	-371.529	91.6463	-373.534	164.104	-366.569	68.5439	-366.529
389.553	-368.667	66.1043	-373.861	91.9645	-373.01	163.646	-366.562	68.9733	-366.721
390	-368.564	65.6222	-373.733	91.1107	-373.279	163.335	-366.523	68.7622	-366.667
390.575	-368.56	65.6667	-374.044	90.8286	-373.235	163.186	-366.468	68.5937	-366.595
389.746	-367.639	65.968	-371.248	92.4504	-372.778	162.597	-366.603	68.7467	-366.781
388.562	-365.338	65.3412	-374.141	92.964	-372.317	161.759	-366.712	69.7581	-366.65
384.648	-361.592	67.4667	-364.467	94.8976	-372.182	160.916	-366.712	70.6328	-366.603
382.073	-358.522	64.1143	-374.8	96.0892	-371.375	160.233	-366.887	70.9347	-366.616
378.159	-358.451	64.48	-374.36	96.7861	-371.089	159.961	-366.826	70.7607	-366.466
375.312	-359.877	67.4333	-358.867	93.6	-371.221	160.203	-366.777	68.6826	-364.582
373.133	-359.719	68.45	-360	89.6083	-371.75	161.438	-367.179	63.8898	-361.932
371.815	-359.528	69.2667	-354.067	83.332	-369.704	164.099	-366.527	58.9381	-360.547
370.239	-360.273	69.9273	-352.182	76.548	-367.34	165.293	-366.675	54.2541	-359.157
369.014	-361.919	68.2286	-355.6	73.7333	-362.506	164.808	-366.302	48.6465	-358.353
367.059	-365.146	62.08	-370.56	67.9673	-362.211	163.076	-365.549	42.651	-357.913
366.069	-369.326	62.2545	-357.964	64.1424	-362.82	162.106	-364.746	37.5314	-358.486
365.357	-369.344	56.8	-358.922	61.5743	-366.283	159.71	-363.255	33.3265	-360.662
364.691	-369.291	54.85	-351.175	55.9126	-374.391	155.947	-360.8	28.4352	-364.481
364.033	-369.151	44.3294	-366.471	54.2532	-374.77	151.294	-360.942	25.3351	-367.773
363.719	-369.17	39.0476	-366.305	55.4877	-373.425	145.582	-359.368	24.1243	-367.936
363.06	-369.187	34	-364.919	53.3947	-374.511	141.665	-361.022	21.8943	-367.616
363.079	-369.164	30.1053	-366.505	52.6466	-374.532	136.321	-361.663	18.7	-367.804
362.501	-369.227	27.136	-368.336	49.888	-374.955	129.262	-361.304	18.0701	-368.107
362.442	-369.164	22.88	-372.187	52.6565	-374.183	124.34	-362.234	18.09	-368.126
362.284	-369.158	21.5429	-374.343	48.5013	-376.258	119.407	-363.529	18.1053	-368.043
362.275	-369.105	20.4667	-374.05	48.4752	-376.198	114.654	-365.79	18.1759	-367.811
362.306	-369.1	17.7143	-374.829	49.7278	-375.497	112.9	-367.02	17.9949	-368.21
362.412	-369.049	18.1556	-374.6	50.7333	-374.982	112.862	-367.229
362.336	-369.1	18.6105	-374.263	47.5181	-375.798	113.465	-367.132
362.347	-369.04	19.3419	-372.155	49.0762	-375.243	114.86	-366.933
362.516	-369.061	18.5419	-374.09	47.3156	-375.72	111.973	-366.327
362.315	-369.091	17.9765	-374.541	50.6346	-373.85	109.552	-366.848
362.472	-369.116	17.64	-374.22	46.5245	-374.891	109.508	-366.947
362.5	-369.062	17.3333	-374.72	46.1289	-373.997	109.509	-366.698
362.386	-369.098	17.1077	-374.985	45.6156	-374.431	109.751	-366.72
362.332	-369.119	17.2381	-374.438	46.9802	-373.435	109.769	-366.553
362.263	-368.846	16.6286	-374.657	47.165	-372.999	109.651	-366.609
362.241	-368.86	16.9053	-374.821	46.7639	-373.194	109.99	-366.415
362.25	-368.844	16.3692	-375.108	47.8607	-373.295	110.127	-366.696
361.944	-368.907	15.4286	-374.514	48.9067	-372.527	111.83	-366.69
361.906	-368.783	15.9	-375.15	50.8836	-371.949	113.283	-366.858
362.108	-368.825	16.24	-375.44	50.5862	-372.359	115.764	-366.875
361.757	-368.905	16.1714	-375.257	47.7323	-371.648	115.587	-366.941
361.752	-368.793	17.12	-375.44	42.9206	-369.692	115.184	-366.996
361.53	-368.989	18.2667	-375.733	37.0883	-367.831	114.883	-366.985
361.724	-369.062	17.6	-374.533	31.8881	-364.858	114.533	-367.077
361.594	-369.034			25.9714	-364.204	113.971	-367.044
361.582	-369.015			23.7806	-361.623	113.032	-367.196
361.869	-369.115			16.9382	-365.08	112.079	-367.432
362.469	-369.131					111.689	-367.517
363.345	-369.014					111.485	-367.157
363.267	-368.859					111.648	-367.468
361.389	-367.547					114.132	-367.62
359.377	-364.616					116.779	-367.533
356.498	-361.052					116.872	-367.221
352.95	-359.461					115.777	-366.797
349.982	-360.312					113.848	-365.368
347.042	-360.647					113.258	-364.807
345.2	-359.69					110.256	-363.585
343.721	-360.256					105.988	-362.309
342.105	-360.88					101.428	-361.846
340.337	-362.237					95.7121	-361.748
338.569	-367.04					91.0452	-361.969
337.78	-369.902					85.0919	-362.072
336.429	-369.961					78.4946	-362.114
336.646	-369.774					73.6415	-363.142
336.277	-369.869					68.9012	-365.232
335.835	-369.79					63.6097	-367.89
335.445	-369.806					62.8301	-368.074
335.187	-369.727					63.0749	-368.138
334.675	-369.883					63.6116	-368.018
334.656	-369.856					65.2901	-367.755
334.53	-369.685					62.2502	-366.425
334.419	-369.625					60.8321	-367.899
334.452	-369.716					60.8327	-367.974
334.299	-369.684					60.861	-367.693
334.243	-369.665					60.8768	-367.608
334.254	-369.663					60.8346	-367.6
334.691	-369.57					60.8967	-367.634
334.64	-369.543					60.807	-367.522
334.848	-369.628					61.3467	-367.483
334.728	-369.594					62.1705	-367.697
334.292	-369.605					65.1703	-367.726
334.28	-369.575					65.1391	-367.739
334.314	-369.519					64.8425	-367.504
334.184	-369.486					64.4258	-367.499
334.07	-369.505					63.9489	-367.662
334.069	-369.353					63.2661	-367.38
333.882	-368.668					62.6936	-368.108
333.8	-369.368					61.7367	-367.954
333.8	-369.366					61.1935	-368.237
333.298	-369.375					60.8484	-368.168
333.7	-369.518					61.0212	-368.34
333.373	-369.561					61.6965	-368.396
332.945	-368.238					64.4096	-368.335
333.408	-369.515					65.6287	-367.702
333.621	-369.524					65.7258	-368.452
334.611	-369.474					64.2047	-367.405
335.359	-369.524					63.5245	-366.047
335.6	-369.327					61.4318	-362.523
334.037	-368.047					57.7292	-363.694
331.912	-365.2					53.1804	-363.107
328.928	-361.839					48.5229	-362.945
325.159	-360					43.0471	-363.052
321.316	-360.942					37.7382	-362.724
319.057	-361.381					31.3131	-362.849
317.2	-360.571					25.3577	-362.861
315.605	-361.171					20.376	-363.598
313.942	-362.181					15.9055	-365.721
312.434	-364.648					10.7468	-368.441
310.907	-369.18					10.0569	-369.056
310.376	-370.531					10.2234	-368.937
309.2	-370.348					11.0206	-368.909
308.814	-370.4					12.6662	-368.749
308.513	-370.367					9.42636	-368.296
307.763	-370.264					8.51324	-368.846
307.627	-370.274					8.52782	-368.835
307.031	-370.242
306.881	-369.467
306.812	-370.288
306.806	-370.275
306.861	-370.239
306.848	-370.235
306.764	-370.287
306.841	-370.29
306.959	-370.235
306.851	-370.254
306.879	-370.256
306.813	-370.313
306.412	-370.206
306.383	-370.232
306.551	-370.162
306.267	-370.218
306.4	-370.034
306.214	-370.029
306.031	-370.043
306.155	-370.054
306.954	-369.458
306.654	-369.514
305.731	-370.056
305.851	-370.042
305.753	-370.165
305.857	-370.166
305.67	-370.127
305.667	-370.267
306.581	-370.204
307.36	-370.116
306.32	-369.56
304.583	-368.217
302.406	-364.706
299.02	-361.414
295.173	-359.697
292.365	-361.571
289.972	-360.602
288.338	-360.871
286.391	-361.67
284.66	-362.764
282.919	-365.713
281.467	-370.874
280.298	-371.308
280.213	-371.156
279.581	-371.062
279.149	-371.114
278.328	-370.994
277.908	-371.2
277.684	-370.994
277.594	-371.015
277.311	-370.983
277.335	-370.962
277.318	-370.953
277.359	-370.921
277.376	-370.906
277.2	-370.017
277.412	-370.888
277.336	-371.031
277.113	-371.007
276.935	-370.94
276.93	-370.93
277.016	-370.911
276.926	-370.882
276.646	-370.821
276.421	-369.941
276.619	-370.751
276.578	-370.795
276.242	-370.952
276.143	-370.854
276.171	-370.766
276.109	-370.743
276.155	-370.897
276.214	-370.936
276.207	-370.964
276.151	-370.931
276.246	-371.06
277.207	-370.859
277.502	-370.884
276.18	-369.984
274.213	-367.547
271.429	-363.971
267.819	-361.432
264.517	-362.144
261.508	-362.749
259.304	-361.901
257.792	-362.439
255.795	-362.444
253.9	-363.415
252.745	-368.318
251.789	-372.015
250.97	-371.037
250.438	-372.023
249.6	-370.966
248.794	-371.253
248.709	-371.205
248.175	-371.11
247.629	-371.886
247.659	-371.888
247.307	-371.813
247.284	-371.058
247.144	-371.859
247.211	-371.924
247.384	-371.905
247.184	-371.896
247.261	-371.856
247.233	-371.078
247.356	-371.078
247.086	-371.886
247.109	-371.84
247.006	-371.778
246.823	-371.837
246.906	-371.733
246.823	-371.724
247.484	-371.147
247.781	-371.112
246.434	-371.629
246.206	-371.697
246.111	-370.533
245.769	-370.807
245.772	-369.938
247.123	-370.877
245.764	-370.892
245.803	-370.807
247.04	-371.78
247.81	-370.766
247.933	-369.767
246.604	-369.977
244.69	-369
242.171	-364.893
238.62	-362.58
234.894	-363.211
231.986	-363.759
229.564	-362.927
227.893	-363.126
226.079	-363.553
224.495	-365.332
222.944	-367.439
221.819	-372.913
221.126	-372.914
220.574	-370.98
219.803	-371.021
219.564	-371.195
218.968	-371.93
218.882	-371.907
219.667	-371.15
218.388	-371.743
218.254	-371.773
218.305	-372.54
218.23	-371.87
217.94	-372.63
217.905	-372.624
218.121	-372.572
218.081	-372.61
218.359	-370.492
218.177	-371.896
218.057	-372.712
217.949	-370.187
217.624	-372.691
217.484	-372.623
217.473	-372.522
217.326	-372.505
217.293	-371.54
217.105	-372.479
216.986	-371.701
217.937	-371.829
217.754	-371.754
216.652	-372.48
216.658	-372.587
216.751	-372.591
216.705	-372.631
216.682	-372.582
216.954	-371.686
218.211	-368.331
218.066	-372.579
217.2	-372.2
215.113	-370.04
212.287	-366.593
208.705	-363.486
205.482	-363.392
202.013	-361.709
199.651	-363.464
197.964	-362.904
196.379	-363.133
194.761	-364.728
193.538	-366.549
192.186	-369.437
190.877	-371.537
189.93	-373.495
189.448	-373.37
188.807	-373.496
188.303	-372.355
188.478	-370.675
188.28	-369.88
187.701	-373.392
187.793	-373.364
187.66	-373.347
187.543	-373.39
187.229	-373.354
187.653	-370.624
187.093	-373.307
187.771	-373.206
187.844	-373.444
187.858	-373.282
187.491	-373.139
187.316	-373.271
187.271	-371.37
187.144	-371.395
187.424	-372.203
187.257	-373.097
186.766	-366.704
186.794	-372.206
186.769	-373.331
186.647	-372.213
186.572	-373.163
186.351	-373.169
186.446	-372.337
186.491	-373.273
186.569	-373.295
186.258	-371.119
187.519	-373.247
188.421	-372.028
187.509	-367.558
186.637	-369.306
184.441	-368.834
180.692	-363.807
177.402	-362.998
174.153	-365.019
170.767	-365.144
168.82	-363.414
167.232	-362.069
165.473	-365.529
163.975	-366.41
163.54	-368.872
161.295	-372.075
160.1	-374.263
159.289	-374.244
158.827	-374.319
159.314	-372.833
158.055	-373.5
157.8	-372.2
157.96	-372.406
157.2	-373.145
157.227	-373.259
157.227	-373.488
157.397	-373.328
157.101	-374.17
156.67	-374.166
157.297	-374.12
157.622	-371.605
157.832	-371.589
157.252	-373.293
157.423	-374.161
157.43	-372.465
157.138	-374.068
157.039	-373.911
156.822	-373.83
156.859	-373.73
156.839	-372.717
156.497	-373.665
156.551	-372.632
156.352	-372.979
156.166	-373.876
157.982	-372.455
155.771	-373.848
156.173	-372.953
155.987	-372.977
155.862	-374.013
156.36	-372.92
157.444	-373.867
157.321	-373.758
155.893	-372.793
153.227	-370.093
150.189	-365.758
146.628	-364.967
143.028	-365.872
139.912	-365.965
137.952	-364.726
136.395	-364.066
134.829	-364.2
133.672	-365.444
131.647	-367.464
129.727	-373.18
130.282	-371.73
128.445	-374.071
127.896	-374.267
127.53	-375.067
126.735	-374.94
126.519	-374.956
126.371	-374.872
126.302	-374.813
126.265	-374.8
127.831	-371.661
125.948	-374.908
126.154	-374.063
125.796	-374.865
125.841	-374.814
125.842	-375.02
126.228	-374.033
125.974	-374.005
125.803	-374.748
127.783	-372.509
126.683	-372.322
126.776	-373.2
125.519	-373.285
125.359	-374.727
125.278	-374.693
126.144	-374.229
125.058	-374.705
124.941	-373.73
126.5	-373.105
126.316	-373.184
126.563	-373.307
124.633	-374.704
124.681	-374.663
124.681	-374.663
125.072	-374.586
125.836	-374.748
125.148	-374.485
123.097	-373.486
120.27	-369.746
117.164	-366.112
113.39	-365.398
109.978	-366.747
107.332	-364.488
105.461	-366.514
103.31	-367.185
101.842	-368.07
99.508	-371.08
98.5733	-375.72
97.8413	-375.067
96.35	-375.994
95.9429	-375.977
95.4831	-375.975
94.9561	-375.951
94.8706	-374.906
94.8889	-373.228
94.3253	-375.877
94.83	-374.385
94.6815	-375.921
94.5442	-375.944
94.2265	-375.981
94.2711	-375.2
94.1256	-375.837
94.1926	-375.106
94.3045	-375.195
94.1888	-375.245
94.0691	-375.062
94.0598	-375.085
93.686	-375.845
93.7289	-375.827
93.5792	-375.938
93.4056	-375.789
93.5532	-375.657
94.0764	-375.222
93.2571	-375.579
92.8753	-375.591
96.3619	-373.324
94.3442	-374.465
94.4238	-373.776
92.6466	-375.786
93.6108	-375.157
93.6732	-375.11
93.0813	-375.875
95.4727	-375.145
95.9222	-375.05
97.0448	-372.979
92.2383	-372.357
89.2819	-368.294
85.0043	-366.196
81.0882	-366.882
77.5556	-367.881
74.7048	-367.478
72.6351	-368.288
70.8889	-368.051
69.288	-370.676
66.7514	-375.6
66.4116	-376.522
65.5952	-376.448
64.6607	-377.169
64.3696	-376.4
63.8353	-377.065
63.5045	-377.164
62.9642	-377.145
62.3429	-376.527
62.4245	-377.106
62.4	-377.046
62.4593	-375.967
62.7759	-376.381
62.299	-376.465
62.1793	-376.271
62.2621	-375.651
62.2122	-377.073
62.1458	-377.142
62.228	-376.524
62.3074	-375.718
61.8429	-377.057
62.7529	-376.216
61.6833	-376.158
61.6533	-376.809
61.5882	-376.137
61.3933	-376.787
61.2791	-375.921
62.0537	-376.01
61.0377	-376.939
60.7022	-376.871
60.5318	-376.772
60.6805	-376.743
60.6368	-377.021
60.5143	-376.977
60.5915	-376.963
60.9211	-376.926
62.1333	-376.812
63.4595	-376.108
62.4645	-375.168
58.5879	-373.455
55.0857	-369.4
51.9227	-367.214
47.9907	-367.6
44.9442	-368.06
42.251	-367.165
40.4255	-367.011
38.6811	-366.807
37.0182	-367.756
35.2272	-370.082
33.4192	-374.112
33.8571	-372.552
32.0213	-378.48
30.9813	-378.347
30.7229	-377.682
30.0977	-378.321
29.75	-378.372
29.5854	-378.351
29.3773	-378.25
29.5175	-377.563
29.2604	-378.242
29.2495	-378.351
28.9136	-378.341
28.7052	-378.342

## Sheet: Sheet2
95A / 75D	95A / 75D	85A / 75D	85A / 75D	Vertical	Vertical	Wide	Wide	85A / 95A	85A / 95A
624.695	12.081	652.849	4.43699	607.704	1.21481	622.371	-0.471429	632.959	8.25316
624.816	11.0633	652.812	4.5806	607.413	1.31613	622.443	-0.4	632.788	8.31166
624.753	11.0882	653.055	4.55507	607.394	1.2	622.3	0.15	632.687	8.20368
624.651	11.1745	652.842	4.62239	607.146	2.74074	622.032	0.494737	632.802	8.25882
624.019	11.1605	653.206	3.9	607.657	2.04675	622.386	0.971429	632.919	8.20848
623.638	10.9381	653.164	3.83333	608.773	1.50455	623.6	1.04	632.989	8.20121
623.327	11.6273	653.184	3.94	610.738	2.04507	625.467	1.12593	632.951	8.20126
623.011	10.2368	652.313	4.75217	611.672	3.73012	628.248	1.2	632.798	8.14971
622.17	10.39	653.086	3.76667	612.516	1.45507	629.289	-1.42222	632.32	8.20976
621.034	8.42414	653.108	3.51026	610.976	1.69492	628.933	-1.82222	631.06	7.9381
619.659	4.32439	653.209	3.6	607.064	1.55254	627.791	-0.0869565	628.901	8.05644
617.764	5.88182	652.947	3.84286	602.234	3.06415	628.109	-1.05455	625.966	7.14771
616.695	4.61579	653.362	3.75714	596.823	7.04	628.609	-2	622.802	4.67636
617.11	2.69355	652.873	4.52857	591.792	11.1462	625.556	1.4	619.408	0.815
616.386	1.1069	649.522	6.88039	587.282	14.2118	626.68	-3.44	617.245	-1.30683
615.672	0.848718	645.403	9.30317	584.427	13.12	613.091	11.0545	615.597	-1.2557
615.817	-0.368571	641.354	10.1971	582.227	10.1867	628.844	-4.93333	613.353	-0.88
615.895	-0.363158	635.6	11.661	579.178	3.77778	627.538	-4.8	612.152	-1.05342
615.613	1.16667	630.968	10.7579	581.9	8.9	616.545	12.3636	611.626	-1.00654
615.788	-0.475	627.356	10.0885	579.169	10	631.12	-1.36	611.716	-0.964848
615.706	-0.488235	623.631	10.6156	576.484	7.15789	628.347	0.826667	611.823	-0.735632
615.445	-0.429032	621.946	9.44634	573.54	3.1	633.178	-3.35556	611.84	-0.872131
615.164	-0.3	618.693	7.85052	575.768	6.52632	625.92	5.32	611.778	-0.943353
615.87	1.38649	615.964	2.93182	575.788	7.71765	628.892	-0.738462	611.614	-0.974419
616.094	-0.370588	615.169	3.34103	575.129	8.25882	625.582	1.14545	611.568	-1.27399
615.8	4.15455	613.409	3.18636	573.484	5.09677	621.418	3.27273	611.429	-1.29193
615.904	1.668	612.528	2.75641	574.294	5.43529	616.74	3.62	610.934	-1.16
615.926	-0.314815	612.308	3.27831	572.897	3.55862	610.42	6.9	610.503	-0.994012
616.356	1.7	612.499	2.85914	571.673	2.85455	608.8	3.8	610.074	-0.89711
615.319	2.75946	612.299	3.24945	570.286	1	604.919	3.34815	609.627	-0.896
615.326	2.97368	612.117	4.12927	571.808	3.16154	599.304	4.27826	608.633	-0.683429
615.758	0.152632	611.622	4.28652	570.439	1.04516	594.37	3.06667	607.834	-0.975281
615.263	1.9375	611.414	5.25342	569.966	1.50286	589.714	4.49524	608.246	-1.14699
615.541	0.292593	611.619	3.53765	569.85	1.50556	585.353	2.86809	608.089	-1.09114
614.446	4.20769	611.816	2.93448	569.901	1.55068	580.649	1.49333	607.768	-1.11358
615.2	0.411111	611.381	3.0381	569.35	1.71	581.047	0.229787	608.07	-1.10311
615.273	0.4	610.905	3.46667	569.257	2.22449	580.082	3.38462	609.76	-1.23636
614.956	1.7878	609.981	4.72892	570.085	2.18462	581.47	2.14	610.439	-1.15636
614.151	2.83962	609.791	3.82615	571.838	2.1619	583.456	0.232	610.211	-1.01146
615.2	0.404762	609.168	4.44194	572.903	2.81348	580.231	1.29231	609.29	0.34359
614.642	1.91818	610.407	3.57273	574.181	2.26301	579.662	1.10769	606.384	3.18182
615.565	0.152174	609.843	3.79804	572.24	1.86947	579.405	1.10769	602.087	5.45034
615.071	1.75161	610.041	3.43793	568.27	2.70811	579.422	0.655556	597.554	6.84634
615.618	-0.0818182	610.172	3.50615	563.93	4.23784	579.675	0.675	593.151	7.90488
614.133	2.68667	611.264	3.556	558.841	7.12464	579.789	0.484211	587.531	8.41481
617.04	-0.22	611.228	3.99655	554.017	11.8817	579.947	-0.0647059	582.215	8.52346
616.32	1.54	608.211	6.1807	549.927	14.8242	579.803	0.704478	578.132	7.27727
611.305	6.16316	604.929	8.02258	546.334	15.2119	580.861	0.321739	573.902	4.27322
608.764	7.76545	600.8	10.625	544.557	13.3929	581.221	0.342857	569.354	-0.0553846
605.306	9.99412	596.184	11.2241	543.061	9.12174	580.888	0.234146	567.774	-0.113043
601.829	9.60857	591.74	10.6636	538.333	3	580.916	0.0129032	566.108	-0.172973
599.2	9.13784	587.816	10.3828	536.55	4.075	580.62	-0.39	562.996	0.909554
597.642	10.3	583.376	10.8846	537.753	7.14118	580.892	-0.810256	561.7	0.3975
596.075	10.3083	579.476	10.1763	537.435	8.28235	580.219	-1.2	561.65	0.157714
594.604	9.8193	577.46	8.89221	538.095	10.5714	579.694	-1.23529	561.598	0.157377
592.607	9.59286	574.062	4.49556	536.552	6.49524	579.589	-1.81714	561.673	0.148066
590.77	7.61515	572.729	2.54471	535.062	2.9625	579.2	-2.67273	561.645	0.0952381
588.8	6.54571	571.036	2.66627	535.786	4.22326	575.244	1.64444	561.747	-0.126437
588.892	0.192308	569.163	2.72326	534.633	4.35833	580.667	-2.13333	561.648	-0.214458
587.45	4.03333	569.267	3.07333	532.844	1.06667	580.133	-2.13333	561.54	0.146108
588.308	0.00769231	569.368	2.68182	534.814	5.12857	577.68	3.96	561.123	0.980117
586.933	0.0047619	569.345	2.6	533.389	3.28421	583.385	-0.984615	561.092	-0.159551
585.916	5.13158	569.335	2.655	533.613	3.67742	587.229	-3.88571	560.426	0.237126
586.133	2.17619	568.7	3.31818	533.329	4.1	581.815	3.90769	559.91	0.317576
586	-0.0272727	568.728	2.62766	532.067	2.51667	581.025	4.25	559.458	0.37377
586.88	0	568.67	3.78434	531.983	3.31268	581.718	0.258824	558.392	0.0348718
586.03	0.411111	568.205	4.545	531.589	1.52	576.887	3.28696	558.411	-0.0967033
585.646	3.32286	568.026	3.97273	531.216	1.72267	574.677	2.36923	558.8	-0.350562
586.129	0.641176	568.067	3.08571	531.168	1.76216	569.747	3.76842	558.624	-0.392941
586.026	0.654839	567.546	3.19877	532.145	1.82727	564.587	4.6625	558.273	-0.373626
585.667	0.633333	566.837	3.84667	533.788	1.84578	560.093	5.68	558.568	-0.40442
585.86	0.67	566.297	3.57879	535.279	1.87907	555.628	6.30698	559.671	-0.331034
585.867	0.328571	565.497	4.8931	536.174	2.51282	550.034	6.45957	560.36	-0.0563758
586.697	0.408571	566.385	3.77925	536.159	2.30769	545.411	6.62456	561.117	-0.0722581
586.069	0.5	566.288	3.18125	533.845	2.21	540.617	5.18644	561.5	-0.236842
586.17	0.584848	566.976	2.86949	529.622	2.77222	536.806	1.78889	560.292	1.64277
586.288	0.8375	567.586	3.35517	524.395	4.85333	534.57	0.42	556.838	4.32152
586.478	0.6	568.648	3.41724	519.273	9.38495	534.011	0.777143	552.266	6.16048
586.525	1.54167	567	4.21429	514.728	12.9393	534.214	0.593103	547.789	7.21978
586.546	0.314634	563.693	7.05122	511.018	13.7773	535.476	0.909091	542.303	8.65325
586.124	0.471429	560.693	9.04634	508.546	13.1122	536.128	0.192593	536.909	9.5052
586.109	0.654545	556.11	10.8978	505.359	10.0329	532.923	1.39231	532.144	9.20225
586.123	0.561538	551.229	11.2667	503.816	5.38361	532.713	1.06957	528.196	7.76596
585.916	0.689474	547.291	10.9187	499.009	1.25217	532.519	1.34468	523.907	4.31778
586.411	0.857895	543.099	11.2275	500.415	5.77778	532.888	0.9625	520.305	0.318421
585.962	1.07143	538.779	12.5513	497.906	3.6	533.6	1.26349	519.055	0.231169
585.463	2.21707	535.729	11.2247	498.992	5.6	533.524	1.4	516.945	0.586503
585.968	0.878378	532.879	8.52574	501.414	9.14286	533.636	1.33134	514.25	0.62924
585.23	2.3963	529.681	3.64762	498.97	5.62424	533.791	1.2058	512.993	0.516854
585.029	2.82381	529.075	2.53	500.272	6.656	534.569	1.38983	512.963	0.641379
586.205	0.597297	527.447	2.76914	498.19	4.49524	534.438	0.271698	513.053	0.662222
585.116	2.87895	526.383	2.43333	496.471	0.428571	534.587	0.524444	513.125	0.56
585.88	2.99	526.106	2.05904	497.106	1.38824	534.335	0.204651	512.999	0.40678
587.114	0.0714286	526.165	2.32824	496.887	2.88667	533.824	0	513.013	0.287425
585.2	3.94	525.929	2.80353	495.571	0.643902	534.131	-0.326531	513.042	0.309302
583.463	4.55854	525.867	2.33218	496.504	3.536	533.305	-0.466667	513.03	0.251163
580.426	7.47872	525.488	2.46774	495.137	1.23137	533.047	-0.317647	512.709	0.767251
577.591	10.2727	525.497	2.84624	494.717	1.92208	532.678	0.0888889	512.212	0.569412
574.05	10.4667	525.171	5.3506	494.488	1.32941	531.168	0.578947	511.606	0.578238
571.637	9.95116	525.446	2.26627	494.261	2.08533	529.379	3.67368	511.041	0.701031
570.183	10.975	524.862	3.25385	493.99	1.56962	533.618	0.418182	510.709	0.666667
568.359	11.0878	524.221	3.54138	494.2	1.73684	533.747	0.56	509.76	0.973333
566.693	10.6533	523.33	4.21	495.133	1.58095	534.622	-0.533333	509.992	0.541538
564.63	9.27778	523.075	3.71818	496.233	1.63077	537.848	-1.80952	510.37	0.303226
563.154	6.6377	523.403	3.00476	497.723	1.61026	539.667	-2.35556	509.872	0.46631
561.558	5.06842	523.606	2.7	498.476	1.61905	537.318	2.28235	509.887	0.3
560.724	1.74324	522.836	3.79286	498.532	1.71053	535.083	2.78333	510.252	0.328571
560.136	1.88723	523.393	2.51333	495.541	1.78378	532.8	1.52	511.23	0.490698
559.837	1.61111	523.415	2.70741	491.031	2.61972	530.05	3.3125	511.832	0.490244
558.985	3.32963	524.094	3.8234	485.85	4.00625	526.175	4.325	512.715	0.537143
558.545	3.05455	524.1	4.13333	481.01	8.78	521.649	5.31707	512.492	1.06988
558.046	3.49429	521.953	4.70678	476.883	13.1708	516.723	6.54839	510.455	3.66275
557.776	3.11463	518.844	7.08889	473.881	15.4234	512.427	6.40678	506.668	6.03529
557.574	7.1	515.51	9.135	470.152	11.6848	507.3	6.16154	502.52	6.97556
557.956	2.01111	510.303	11.7901	466.848	6.6806	501.947	6.67368	497.769	8.81882
557.981	2.94762	505.222	12.3688	464.267	1.84167	497.753	5.15464	492.709	9.91381
557.84	0.82	501.431	10.8741	463.319	3.42128	493.379	2.91494	487.422	10.6422
557.633	0.867213	497.157	11.6462	462.662	5.36552	489.359	-0.187952	482.763	10.6065
557.715	0.815385	493.229	11.1675	459.435	0.705882	489.132	-0.115789	478.995	8.60476
557.922	0.77451	490.351	9.19778	461.6	4.95172	489.803	-0.521739	474.608	4.88588
558.369	0.939216	487.477	5.36383	462.362	3.27619	489.969	-0.00776699	471.346	0.817073
558.156	1.83333	485.624	1.85181	460.558	2.46316	490.177	0.379381	470.4	0.468293
557.835	0.821739	484.471	1.96582	460.485	1.72308	488.149	0.98022	468.12	1.15059
557.6	0.735294	482.063	2.79888	461.164	2.64	487.157	1.22667	465.714	1.16201
557.867	0.917778	482.067	1.64831	461.472	3.94717	487.42	0.782609	464.745	1.22759
557.727	0.909756	481.976	2.37451	461.991	5.63478	487.481	0.849123	464.716	1.22486
557.659	0.773171	481.856	1.852	459.21	2.6439	487.528	0.824096	464.655	0.983784
557.487	1.07436	481.768	1.76168	458.535	1.13231	487.821	1.17647	464.98	1.36667
557.124	3.43333	481.592	1.91143	458.081	0.61875	487.938	1.18519	464.869	1.09319
557.809	1.06364	481.445	1.9466	457.651	0.923944	487.788	1.13538	464.789	0.782022
557.331	1.94727	481.761	1.95361	457.688	0.905882	488.436	0.975	464.57	0.878161
557.223	0.976923	481.59	1.885	457.216	0.994595	489.337	0.407843	464.525	0.934066
557.422	1.27037	481.338	1.94138	457.067	1.19467	489.554	0.516667	464.267	0.953333
557.131	1.14828	480.944	2.11333	457.2	1.6381	489.266	0.206593	463.666	1.08066
556.98	1.03878	480.564	2.24872	457.6	1.02174	488.681	0.153086	463.293	1.03915
557.51	0.84	480.041	2.37536	458.688	1.57674	488.476	0.355556	462.886	0.975401
557.381	0.719355	479.441	2.79412	460.095	1.69048	488.167	0.901493	462.265	1.21658
557.326	0.968571	479.479	3.04286	461.299	1.14157	487.728	0.316667	461.766	1.05285
556.937	0.963158	479.713	2.1	461.609	1.07126	487.341	0.576471	461.778	1.12391
557.567	0.788889	479.267	2.35185	460.627	1.20482	486.897	0.571429	462.111	0.846073
558.306	0.829412	479.744	2.40492	456.782	2.13538	485.722	1.20678	461.602	0.82623
558.333	0.977778	480.368	2.5	451.797	2.29367	487.128	0.286567	461.777	0.795676
556.485	2.7303	481.74	2.84884	446.826	6.12105	487.879	1.33968	462.023	1.1399
553.747	5.60526	480.604	3.5	442.205	9.2093	489.545	1.39608	463.304	0.887047
551.413	9.23778	477.797	5.69683	437.936	13.216	491.571	0.242857	463.941	1.03956
547.728	11.0872	475.048	7.67465	435.184	13.5027	493.352	0.285714	464.654	1.00838
544.385	10.5077	471	9.56	431.01	10.2441	494.167	0.244444	464.2	1.64474
542.148	10.6852	465.676	10.0772	428.895	4.32727	492.908	1.21081	462.013	4.22762
540.662	11.8769	461.407	9.80588	426.052	1.53043	489.38	2.43265	458.214	6.17143
538.838	11.3	457.041	10.0446	427.188	5.17576	484.575	6.54167	453.873	7.68
536.669	10.9812	452.672	11.0901	422.741	0.411765	482.4	4.45333	449.069	9.35
534.874	11.0737	449.284	11.1372	424.151	2.24865	479.048	5.328	443.957	9.94157
533.926	6.96842	446.851	8.38837	422.64	1.30667	474.224	6.25882	438.585	10.0201
532.384	2.06735	443.693	4.57475	423.609	2.76364	469.606	7.28615	434.097	8.89524
531.989	4.85676	441.908	1.28378	423.191	1.63721	464.897	7.09885	430.415	6.11957
532.133	0.433333	441.256	1.86279	422.908	1.35	459.075	7.55932	425.776	1.46243
530.096	8.932	439.51	1.55393	424.846	4.53846	454.118	6.50196	424.243	0.6
530.345	1.28182	439.073	0.981818	424.286	6.13333	450.679	4.99568	423.115	0.656522
530.453	2.82	439.314	1.14835	424.391	5.42727	445.95	2.61667	419.371	1.45684
530.055	3.22727	439.22	1.05644	422.708	2.47213	443.408	0.384615	417.811	0.978462
529.157	2.71622	438.954	1.07576	421.612	0.888235	443.545	0.654545	417.458	0.864921
528.676	2.61429	438.816	1.13636	420.952	0.338028	443.971	0.703614	417.473	1.001
528.633	3.58333	438.585	1.15714	420.119	0.27013	444.404	0.459574	417.558	1.10813
528.569	1.34615	438.644	0.815556	420.047	0.865116	444.641	0.695495	417.594	1.16311
528.785	1.32963	438.444	0.895556	419.922	0.895652	442.126	1.04348	417.502	1.10833
529.063	1.25789	438.205	1.86757	419.562	0.523404	442.034	1.2	417.503	0.827513
529.116	1.11754	437.57	1.81304	419.371	0.533333	442.262	0.681967	417.464	0.916201
529.114	1.17857	436.88	1.93765	419.796	0.556522	441.939	1.20941	417.304	0.956906
529.024	1.18475	437.041	1.9254	421.117	1.05	442.205	0.866667	416.94	1.12994
529.118	1.07143	436.274	1.35263	422.558	1.73626	442.343	0.966667	416.512	1.14382
528.966	3.09623	436.643	1.34918	423.503	1.59121	442.774	1.2	416.011	1.15652
528.431	4.13846	436.393	1.47333	423.052	2.07619	443.568	1.12632	415.402	1.28367
528.43	2.57	436.293	1.42889	420.424	1.94146	444.089	0.862963	414.73	1.3809
528.236	2.44545	436.791	1.7	416.308	1.62162	443.977	0.692308	414.572	1.18564
528.438	1.44615	438.133	1.97619	411.313	3.63077	443.579	0.855319	414.662	1.24396
528.571	1.47959	438.623	1.97442	406.452	7.76104	443.2	0.711111	414.791	1.04494
527.783	3.6	436.809	2.59787	401.851	10.5687	442.545	1.17447	414.288	1.1618
528.164	1.35455	433.79	5.33051	398.532	13.6051	442.835	1.2	414.591	1.06222
528.365	1.59474	430.576	7.00244	394.606	11.4778	442.508	1.05412	415.28	1.1
528.31	1.65862	425.805	8.68974	391.062	6.76875	442.203	1.14921	416.511	1.15145
528.01	1.83	420.755	9.57273	390.638	2.88462	441.141	1.25902	417.126	1.11667
527.71	3.11	416.435	8.32963	388.297	1.22286	441.013	0.945455	417.496	1.31059
528.294	1.58235	412.155	8.84	386.542	0.966667	440.759	1.05517	416.352	2.91394
527.968	1.412	407.962	9.25238	383.75	-0.566667	441.953	0.9	413.534	5.38579
528.043	1.45714	404.839	8.37312	384.158	-0.1	443.905	0.210909	409.353	7.32022
527.931	1.38276	401.983	5.4087	385.4	1.42667	444.656	1.12	404.778	8.48177
528.16	1.43333	399.158	0.784211	385.968	1.84	446.545	0.0181818	399.891	9.72444
528.4	1.43333	398.695	0.706154	386.439	2.64516	447.782	0.652632	394.686	9.76129
529.093	2.68537	396.186	0.8	388.483	7.85	447.078	1.87826	389.62	9.33785
529.042	1.79474	395.451	0.311429	385.582	5.15455	445.502	2.51429	385.661	7.9
527.374	2.78718	395.318	0.441176	384.908	2.53333	441.991	3.74831	381.304	5.05208
524.991	6.19565	395.214	0.361176	383.302	-0.297872	439.105	4.47368	377.787	1.01965
521.98	9.93415	395.243	0.4	383.729	0.328571	435.195	5.32152	376.446	0.60578
518.183	11.5348	395.246	0.586316	383.451	0.379661	431.033	5.89818	374.117	0.969143
515.17	11.1868	394.828	0.657647	382.406	-0.137143	426.395	6.1494	371.742	1.14583
512.94	11.3952	394.877	0.592308	381.69	-0.315	421.774	7.46522	370.521	1.12849
511.207	12.6333	394.805	0.241463	381.463	-0.349367	416.381	7.46923	370.317	1.07978
510.239	12.8298	394.71	0.474194	381.34	-0.207792	410.566	7.33793	370.184	1.16578
508.566	12.66	394.577	0.811475	381.214	-0.254545	406.791	5.7617	370.331	1.32421
506.577	10.9229	393.993	0.987719	381.774	-0.249412	402.411	3.26792	370.287	1.32565
505.243	8.28919	393.376	0.788136	382.945	-0.14026	398.807	0.83252	370.344	1.24469
504.008	4.56531	393.286	1.3381	384.05	-0.25	398.574	0.870588	370.35	1.11377
503.45	1.2375	392.937	1.34211	384.96	-0.213333	398.89	0.666667	370.19	1.16532
502.667	1.08095	393.083	0.865854	385.459	-0.174118	399.468	0.366972	370.114	1.14534
502.956	1.09512	393.011	1.07895	385	-0.0666667	400.667	0.884848	369.628	1.10213
502.183	1.15833	392.973	0.7	381.33	0.648649	397.732	0.872727	369.191	1.07039
501.551	1.1449	393.444	1.0122	376.651	0.845714	396.921	0.826316	368.776	1.15939
501.517	1.34138	394.729	1.25294	371.537	3.38421	397.078	0.502439	368.101	1.22342
500.865	1.18571	394.705	1.35263	366.805	8.30843	397.306	0.95102	367.513	1.16727
501.043	3.68689	391.763	3.03333	363.061	11.2727	397.27	1.03	367.443	1.13204
500.926	1.33704	388.831	4.9375	359.25	11.72	397.495	1.16589	367.582	0.957214
500.965	1.42063	384.955	7.148	355.8	9.76571	397.507	1.1712	367.497	1.03518
500.969	1.48983	379.958	8.62558	352.733	3.27407	397.606	1.40882	367.235	1.0342
501.029	1.42857	375.506	8.04588	351.804	1.37778	397.954	1.20328	367.379	1.03505
501.03	1.3963	371.271	7.55063	348.011	-1.92222	398.587	1.06074	368.192	1.02083
500.879	1.3918	366.396	8.11124	349.471	2.08235	398.461	0.980153	368.933	1.0487
501.082	1.18182	362.068	8.225	346.514	-2.14694	398.45	0.739496	369.772	1.07039
500.965	1.11739	359.819	6.93656	347.638	0.225	397.944	0.952	369.776	1.10508
500.644	1.27288	356.726	2.43333	346.915	-0.443836	397.751	0.842718	368.464	2.68941
500.818	3.03134	355.042	-0.392958	347.469	0.328358	397.486	0.747619	364.986	5.02434
500.423	6.01304	354.693	-0.25814	349.069	2.03448	397.156	0.54375	360.973	6.46633
500.644	2.26296	352.933	-0.0946667	346.86	-0.519149	396.435	0.54902	356.427	7.98958
500.707	3.31429	352.138	-0.677778	346.166	-0.634483	396.028	0.68	351.45	8.92878
500.961	1.52581	352.054	-0.587805	345.982	-0.733333	395.792	0.359494	346.271	9.09423
500.611	2.54912	352.047	-0.622353	345.873	-1.04242	395.467	0.911111	341.434	8.98113
500.452	1.62787	351.846	0.0538462	344.733	-2.46667	397.273	1.01091	337.3	7.58302
499.9	4.74118	351.852	-0.413402	344.431	-1.84	398.671	1.06452	333.302	4.07343
500.318	1.92941	351.719	-0.372527	344.416	-1.072	399.957	1.15	330.441	0.47957
499.252	5.37213	351.639	-0.522535	343.662	-1.32308	401.627	1.07119	328.912	0.683243
499.843	2.66429	351.65	-0.772727	343.363	-1.42796	402.385	1.43704	326.385	0.814815
499.768	3.13871	351.285	-0.574667	343.537	-1.45882	401.377	2.39429	324.137	0.928342
499.992	2.348	350.958	-0.27284	343.162	-1.28511	398.883	3.2	323.037	0.663043
500.252	1.39565	350.421	-0.166667	343.67	-1.42222	395.875	4.35224	323.017	0.78209
500.08	2.364	349.9	1.18571	344.595	-1.39823	392.529	4.78788	323.118	0.877612
501.117	1.375	349.648	-0.0904762	345.953	-1.25882	388.595	5.37436	323.21	0.917308
501.617	3.52128	349.494	-0.442857	346.954	-1.21188	383.765	5.83059	323.218	0.840976
501.742	3.58444	349.69	-0.532653	347.357	-1.08454	379.404	6.46939	323.261	0.822749
501.167	2.15556	349.442	-0.313953	345.276	-1.06835	374.227	6.88649	323.094	0.619689
500.249	4.15405	349.713	-0.520513	341.263	-0.771084	368.361	7.01039	323.065	0.676768
496.7	7.96429	348.886	2.62432	336.047	1.07442	362.728	6.6	322.713	0.65
493.723	10.9308	351.689	-0.485185	330.906	4.56709	359.159	4.35616	322.32	0.656085
490.214	11.4767	350.465	0.119355	326.357	7.96145	355.07	2.17183	321.819	0.9375
487.254	10.3373	347.343	2.26429	322.553	9.92809	352.513	-0.205128	321.482	0.814545
484.949	11.4313	344.368	4.88413	318.967	9.03291	352.449	-0.204878	320.834	0.808197
483.456	11.6279	339.741	6.23514	315.2	5.51385	353.103	0.233333	320.163	0.948333
481.951	10.8262	334.79	7.295	316.154	0.753846	353.362	0.173427	320.073	0.801688
479.68	9.48462	330.208	6.63067	310.676	-1.03448	354.408	0.736552	320.348	0.730435
478.419	6.85556	325.582	7.40588	311.061	0.991304	350.914	0.495385	320.139	0.696833
476.744	1.732	320.544	6.59691	309.238	-0.85283	350.969	0.466055	319.924	0.755947
476.12	4.03333	317.209	5.35455	307.417	-2.275	351.019	0.380769	320.235	0.765919
474.552	1.07143	314.49	3.40112	306.756	-2.34667	351.188	0.765891	321.29	0.76555
475.122	3.36957	311.283	-0.472222	308.065	-0.894545	352.285	0.644961	322.237	0.792308
474.137	1.15143	310.412	-1.25821	307.514	-1.64706	352.586	0.649315	322.571	0.955789
474.108	1.175	307.206	-1.3303	307.621	-1.09744	352.505	0.591892	322.248	1.41538
473.394	0.951613	306.66	-1.66364	306.528	-2.624	353.105	0.644898	320.435	3.40518
473.133	2.05	306.4	-1.59048	305.535	-3.34839	353.897	0.565986	316.556	6.16092
472.941	1.12745	306.483	-1.57586	305.582	-3.21818	354.563	0.655385	312.412	7.11503
472.913	2.425	306.4	-1.68554	305.217	-3.10833	354.708	0.0183908	307.693	8.38416
472.725	1.19153	306.252	-1.3809	305.052	-3.23692	354.545	0.555372	302.292	8.8657
472.725	1.31356	305.968	-1.38649	304.674	-2.92055	354.412	0.501961	297.175	8.68302
472.819	1.34375	305.867	-1.31067	304.23	-2.75217	353.826	0.517391	292.01	7.83415
472.553	1.28	305.758	-1.74211	304.312	-2.625	353.667	1.05169	288.137	5.96607
472.664	2.18136	305.594	-1.72941	303.972	-2.55758	353.518	0.44918	283.911	1.75842
472.785	1.30769	305.141	-0.558824	303.808	-2.404	352.955	0.168067	282.345	0.319577
472.768	1.23016	304.874	-1.26308	303.831	-2.38532	352.085	0.314815	280.753	0.0391753
472.939	1.19697	304.394	-1.35556	304.564	-2.44727	352.085	-0.19798	277.387	0.55
472.885	1.28788	304.208	-1.372	305.709	-2.29126	351.112	1.52842	275.46	0.368
472.483	2.23968	303.405	-1.12326	306.946	-2.32696	353.77	-0.134783	274.751	0.372487
472.652	1.42258	303.611	-1.41579	307.757	-1.6866	355.851	-0.137255	274.917	0.317588
472.529	1.39032	303.849	-1.28222	307.467	-1.76078	356.731	-0.182857	274.802	0.47037
472.443	1.35957	303.622	-1.08378	304.208	-2.0375	357.636	-0.114851	275.018	0.32
472.328	2.412	304.074	-1.31053	299.528	-0.251064	357.575	0.457732	274.963	0.336735
472.506	1.36531	304.679	-1.34848	294.219	1.87368	356.623	1.34737	275.028	0.090566
472.106	2.54528	305.2	-0.817949	289.967	4.58969	353.936	2.52437	274.729	0.45102
472.253	1.72667	302.578	0.822222	284.602	6.1573	350.026	4.10189	274.76	0.280597
471.435	5.03529	299.864	2.35957	280.938	7.21026	346.087	4.79677	274.412	0.0756219
471.688	3.60588	296.169	5.2875	277.125	5.9	342.206	5.28571	273.98	0.225116
471.731	2.83846	291.087	6.30597	274.4	1.47222	337.041	5.3619	273.421	0.482456
471.577	4.49231	286.302	6.15366	270.955	-3.73878	332.397	5.67328	273.067	0.315447
471.872	3.38	281.956	5.44375	268.449	-3.87755	327.064	5.784	272.43	0.323506
472.038	2.38679	276.786	6.12857	267.455	-4.30303	321.693	5.47887	271.649	0.476735
471.879	2.4814	272.389	6.08947	266.391	-4.22727	317.164	4.71111	271.633	0.218026
472.485	3.50426	269.639	4.73855	265.526	-4.58605	312.692	2.81103	271.902	0.181818
473.562	3.88095	266.387	2.17865	265.364	-4.6	308.397	-0.35641	271.715	0.272727
474.108	1.58333	263.353	-2.21333	265.412	-4.34118	308.044	-0.690411	271.667	0.0552301
472.093	2.56667	262.986	-2.43793	265.394	-4.33143	308.219	-0.429333	271.741	0.490164
470.722	5.28049	260.691	-1.82	265.535	-4.76279	308.611	-0.431579	272.905	0.1869
467.818	8.41765	259.894	-2.34706	265.233	-4.37778	310.41	-0.0888889	273.638	0.165217
464.486	10.9865	259.984	-2.41892	267.503	-3.00541	307.665	0.366234	274.031	0.312963
460.936	10.8019	260.005	-2.35789	264.962	-4.48649	306.32	-0.386207	273.59	0.704663
458.332	11.0288	259.965	-1.65443	264.619	-4.69434	306.4	-0.411976	271.394	2.58641
456.627	12.9	259.571	-2.37246	264.679	-4.36429	306.395	-0.376471	267.447	4.81682
455.348	13.2097	259.3	-2.50556	264.097	-4.07179	306.437	-0.0149068	263.092	5.92646
453.266	12.6791	259.057	-2.61429	264.293	-2.81237	306.751	0.239024	258.319	7.29692
451.63	10.816	259.108	-2.65738	263.676	-3.19238	307.077	0.262722	253.002	7.54855
450.08	7.87231	259.011	-2.41273	263.562	-3.36207	307.135	0.215758	247.333	7.40524
448.654	3.04634	258.671	-2.35714	263.197	-3.83802	307.615	0.188387	242.626	6.94355
447.776	0.890244	257.877	-1.64462	262.96	-3.61	309.043	-0.05	238.833	4.65923
447.211	0.865714	257.652	-0.615942	263.593	-3.12414	309.288	-0.00754717	234.504	0.17037
446.661	1.12609	257.438	-2.24468	265.802	-2.19099	308.978	-0.160494	233.12	-0.946977
445.853	0.886667	256.991	-1.18182	266.433	-3.46422	308.719	-0.225503	231.915	-0.774194
445.661	1.1303	257.326	-2.68947	266.887	-2.83273	308.318	-0.31831	227.92	-0.327442
445.328	1.24043	257.473	-2.40244	265.2	-3.20816	308.447	-0.300775	226.135	-0.519626
445.312	1.084	256.765	-0.711765	261.549	-1.75632	307.74	-0.0244275	225.794	-0.647706
445.408	1.084	258.19	-2.8619	255.819	-0.76129	306.994	0.0056338	225.817	-0.449541
445.463	1.1625	258.514	-2.61429	250.612	2.288	306.382	-0.0254545	225.834	-0.337931
445.357	1.1902	257.771	-2.02381	246.981	5.85376	305.937	-0.205217	225.86	-0.363319
444.94	1.18772	255.111	0.266667	243.639	6.73978	306.011	-0.27037	225.874	-0.460274
444.792	1.15385	252.075	2.15833	238.677	5.37284	306.777	-0.76748	225.831	-0.590135
444.562	1.10426	247.816	5.25238	234.468	2.1039	308.296	-0.665546	225.609	-0.584038
444.962	1.16923	242.597	7.28507	231.735	-3.62581	309.698	-0.606349	225.58	-0.648649
445.142	1.95806	238.029	4.73529	229.679	-3.21429	311.139	-0.621429	225.318	-0.603636
444.755	1.11132	232.865	4.50645	227.938	-3.23077	312.206	-0.531959	224.928	-0.555556
444.585	1.14615	227.6	4.9	224.4	-5.6	311.094	1.29057	224.269	-0.470968
445.048	1.31905	223.877	4.68933	223.482	-5.68182	309.871	1.58667	223.809	-0.450593
444.837	1.33077	220.933	2.25333	223.074	-5.75789	306.406	2.68387	223.288	-0.479412
444.966	2.04857	217.057	-1.76667	223.112	-5.832	302.709	3.60909	222.782	-0.317647
444.968	1.38108	216.483	-0.95283	223.226	-5.87234	298.842	4.21053	222.498	-0.471375
444.953	1.39863	214.323	-2.75385	225.163	-4.23256	293.597	4.97778	222.865	-0.710236
445.029	1.39412	212.061	-2.94068	224.549	-4.40678	289.243	4.49771	222.468	-0.710769
444.782	2.20909	211.986	-3.14407	223.927	-4.24	284.169	4.82177	222.256	0.0515152
444.677	1.42258	213.267	-1.96061	224.771	-3.25217	278.403	5.08679	222.65	0.201481
444.516	1.4871	213.458	-0.988136	222.578	-6.17037	272.861	4.59059	224.144	0.536842
444.3	1.63846	212.029	-2.75507	224.114	-5.11111	268.498	3.20245	225.249	-0.5
444.148	1.58889	212.767	-2.32778	221.988	-5.54783	264.09	1.13077	225.519	-0.460345
444.114	1.6102	211.594	-2.78571	221.631	-5.27556	261.185	-1.1038	224.866	0.572444
444.374	1.50426	211.575	-1.61667	221.837	-4.7687	261.079	-0.833333	221.158	2.64292
444.267	1.49608	211.905	0.3	221.348	-5.13448	261.349	-0.790533	217.087	4.92152
444.612	1.62653	212.8	1.10714	221.516	-4.48381	262.126	-0.942282	212.516	5.65806
444.47	1.4614	211.14	0.586792	221.054	-4.92308	262.849	-0.892683	207.179	6.58049
444.118	5.85455	210.651	-0.358824	221.365	-4.83137	259.026	-0.992308	201.45	7.09778
445.978	3.08182	209.877	-3.3	222.723	-3.79649	258.867	-1.22797	196.042	6.82388
445.58	2.44576	209.451	-0.680392	224.194	-3.91613	258.767	-1.01769	191.854	5.39692
444.256	2.988	209.363	-2.88519	224.984	-4.14513	258.779	-0.833987	187.531	2.74918
442.43	5.80566	209.7	-2.93333	224.905	-4.51963	258.92	-0.933333	183.649	-0.828194
439.741	8.94118	209.634	-2.92286	223.468	-3.72308	258.718	-0.936842	182.316	-1.41345
435.846	10.8692	209.807	-3.06552	219.611	-2.47706	258.547	-0.845596	180.139	-1.06133
432.361	10.429	210.384	-3.124	214.082	-0.0893204	258.919	-0.529101	177.045	-1.165
430.081	10.4139	211.23	-3.32963	209.111	4.08081	259.832	-0.756886	175.627	-1.12941
428.394	12.2455	210.484	-2.54211	204.162	6.5434	260.741	-0.955414	175.631	-0.962712
426.702	12.1732	209.737	1.42195	199.45	5.91923	260.785	-1.02061	175.451	-1.0753
424.933	12.3429	205	2.55263	194.81	2.8	260.44	-0.932544	175.547	-0.871667
423.478	11.4805	198.725	3.775	190.96	-1.89091	260.161	-0.91465	175.571	-0.90449
422.021	9.36933	194.527	5.67143	189.346	-4.01538	259.895	-0.968421	175.463	-1.21333
420.889	5.62381	188.729	4.12581	187.244	-3.64444	259.524	-1.08466	175.533	-1.15
420.092	0.776923	184.086	3.57059	188.553	-1.4	258.901	-1.15723	175.523	-0.994958
419.12	0.690769	179	4.47143	187.375	-0.254545	258.288	-1.13094	175.412	-1.23419
418.939	0.7	175.557	4.59286	183.741	-4.25882	257.483	-1.47143	175.583	-0.229536
418.97	0.65082	172.912	3.0814	185.588	0.197101	257.185	-1.28679	174.244	-0.937815
418.673	0.7	168.8	-1.05385	186.19	0.747541	257.226	-1.31481	173.716	-0.988525
418.02	0.768852	168.085	-2.57869	184.435	-1.52982	258.699	-1.36566	173.188	-1.0058
418.014	0.818644	166.007	-3.00909	185.004	-2.25306	260.41	-1.36068	172.624	-0.92852
418.049	0.850769	163.796	-3.36792	183.639	-2.6902	261.924	-1.296	172.079	-1.081
417.894	0.73125	165.383	2.85593	184.451	-4.01127	263.01	-1.41386	172.161	-1.1631
417.93	0.950794	163.807	-3.39286	182.748	-5.2129	263.481	-0.531915	172.236	-1.27704
417.858	0.867123	163.971	-2.32143	180.073	-6.84507	262.365	0.1824	172.034	-0.929771
417.8	1.74828	164.187	-1.31935	181.678	-6.25455	260.019	1.06349	172.25	-0.904089
417.713	1.64667	163.333	-3.05686	180.283	-5.9122	256.194	2.53429	172.356	-1.09885
417.586	0.689474	163.54	-1.87872	179.359	-6.24425	252.492	3.08276	173.709	-1.10725
417.748	0.844615	163.067	-3.44286	179.426	-5.41913	248.565	3.41818	173.983	-1.12969
417.539	0.80303	164.22	1.73	180.995	-4.68376	243.944	3.70701	174.193	-0.939655
417.533	0.809091	163.722	1.19565	180.212	-4.41008	238.959	4.16667	173.132	-0.34876
417.363	0.89375	162.708	-1.58718	179.969	-4.95932	233.087	4.59211	169.512	2.1614
417.34	0.806667	162.013	-3.2625	179.671	-4.64538	227.259	4.34091	165.171	3.8616
417.508	0.992308	161.635	-3.57059	182.461	-3.17627	222.321	3.71329	160.371	5.10598
417.303	0.996552	161.303	-3.82903	182.96	-4.25905	217.519	1.89787	154.87	6.0968
417.155	2.0871	161.006	-3.74848	183.73	-3.95897	212.918	-1.35	149.626	6.67072
417.432	1.13871	161.304	-3.75217	184.08	-4.19826	211.879	-1.90549	144.571	6.58686
417.279	1.21549	161.354	-3.82308	181.944	-2.82222	211.971	-1.84719	140.507	5.8
417.176	1.27612	161.84	-4.06	175.146	-4.49897	212.482	-1.69143	135.748	2.90811
416.935	1.26774	161.556	-3.52222	169.969	-1.78222	214.097	-1.82105	131.734	-1.83898
416.817	1.46571	162.748	-3.31739	164.084	-0.208889	211.478	-1.2442	130.247	-1.295
416.771	1.27059	160.954	-2.31538	159.641	2.95172	209.506	-1.68	128.325	-1.89268
416.814	0.95614	157.52	0.334286	155.398	4.50575	209.395	-1.82558	126.09	-1.86613
416.676	0.811111	153.746	2.34878	151.757	3.82174	209.415	-1.65876	124.397	-1.85983
416.967	0.943636	148.442	5.83684	147.76	-1.75	209.769	-0.837811	124.267	-1.75652
416.951	1.00492	143.583	5.96087	148.262	-2.81455	209.73	-1.52778	124.436	-1.88509
416.963	1.82881	139.585	6.81111	147.575	-2.45	209.794	-1.42642	124.456	-1.94725
417.784	3.52295	133.973	4.87778	141.592	-5.96154	209.738	-1.37143	124.517	-1.94946
418.455	0.989655	129.546	4.78462	140.853	-5.74706	210.191	-1.44976	124.488	-1.92656
418.235	1.33478	126.831	4.03846	138.84	-6.94	211.546	-1.664	124.441	-1.96423
416.547	2.58	122.693	-0.0111111	139.608	-5.89804	212.61	-1.75615	124.308	-2.04211
414.573	5.84118	119.986	-3.95714	139.146	-6.16119	214.134	-1.77143	124.071	-2.12126
411.935	8.9	118.6	-3.80667	143.638	-2.55529	213.788	-1.30238	123.591	-1.83755
408.443	11.1261	119.162	-0.728571	139.656	-5.94386	213.682	-1.64578	122.995	-1.59699
404.943	10.5981	115.751	-4.00222	139.958	-5.45075	213.315	-1.64912	122.709	-1.4259
402.234	10.3338	115.292	-3.94615	139.664	-5.72174	212.827	-1.71299	121.929	-1.62192
400.476	11.8676	115.438	-3.86154	138.547	-6.28824	211.814	-1.26708	121.075	-1.56091
399.267	11.7	117.208	-2.53019	137.389	-7.75429	211.418	-2.03787	120.988	-1.72248
397.76	11.5653	115.337	-3.60526	141.867	-4.78974	210.126	-1.29591	121.345	-1.48404
396.119	10.1811	114.983	-3.39143	139.266	-6.17143	210.018	-0.977444	121.031	-1.76644
394.911	6.97222	114.8	-3.6375	136.36	-6.77431	209.954	-0.122807	120.639	-1.0299
393.702	2.5186	114.74	-3.6	139.078	-4.66777	211.635	-1.24088	120.842	-1.08097
393.671	1.7	114.411	-3.73333	138.092	-4.88136	214.041	-1.69041	121.701	-1.02316
392.393	0.408772	114.32	-3.63333	136.872	-5.73115	214.968	-2.02105	122.74	-0.815385
391.976	0.615152	113.733	-3.78	136.715	-5.70382	215.507	-1.78102	122.921	0.339649
391.935	1.36545	113.381	-1.51935	137.542	-5.15556	215.017	-0.943511	123.818	-0.419649
390.959	0.527586	113.2	-3.74138	137.641	-5.67302	213.699	0.774648	121.527	0.425468
390.973	0.437255	112.637	-1.55185	140.025	-5.1193	211.85	0.469048	117.084	3.06617
390.74	0.590566	114.017	3.61667	139.749	-5.58584	207.358	2.50698	112.721	4.18638
390.9	0.59375	114.338	7.80769	138.178	-5.94603	203.261	3.016	107.397	4.80412
390.575	0.466667	114.35	7.5	135.723	-4.48224	199.443	3.32	101.518	5.63537
390.528	0.5	114.422	6.52222	130.467	-3.35556	194.285	2.87123	95.9322	5.60271
390.463	0.366667	114.776	7.14706	124.979	-1.13786	188.835	2.93115	91.069	5.04414
390.63	0.403704	115.7	10.8	118.594	1.62202	182.813	3.1587	86.486	3.05663
390.531	0.444828	113.25	13.15	114.713	4.9901	177.198	2.88432	81.935	-1.04311
390.662	0.480328	108.267	0.2	110.935	5.48119	172.706	2.57801	79.9663	-3.049
390.714	0.493846	103.97	2.75926	106.118	2.69474	168.013	0.888172	79.1923	-3.07126
390.542	0.46129	99.2667	5.87143	102.621	-4.02824	163.578	-2.80874	75.1642	-2.46269
390.432	1.42903	95.7463	8.15366	106.341	-2.01951	163.17	-2.65274	72.6212	-2.81465
390.262	0.624138	91.0778	8.06667	107.806	-0.3125	163.506	-2.5098	72.2046	-2.84154
390.386	1.48305	85.4421	6.74211	101.034	-5.7434	164.152	-2.52727	72.1367	-2.79568
390.394	1.44769	81.5304	5.9087	105.422	0.607407	165.333	-2.20106	72.1693	-2.81798
390.252	0.758462	76.8889	1.96222	97.7795	-5.40513	160.821	-1.64299	72.2111	-2.6524
390.254	0.804225	73.0788	-1.10606	97.3039	-5.02338	160.429	-2.39116	72.1487	-2.84312
390.178	1.59444	70.9263	-4.58421	94.6643	-8.47857	160.487	-2.26667	72.1398	-2.66165
390.127	0.893939	77.7333	-0.0666667	98.1	-6.395	160.44	-2.20899	71.9822	-2.96208
390.023	0.9	67.2632	-4.06842	99.5862	-5.27816	160.509	-2.06522	71.9293	-2.67068
389.663	0.734921	67.1613	-4.19032	95.4429	-7.64762	160.3	-2.13767	72.1296	-2.6816
389.581	0.86129	67.38	-2.66	94.3347	-8.55918	160.411	-2.20452	71.2794	-2.62206
389.636	0.914286	67.928	-1.684	94.963	-6.75062	160.419	-2.01379	70.623	-2.59094
389.44	0.606667	67.5333	-2.72857	97.5892	-5.95135	161.518	-2.15088	70.2357	-2.45223
389.693	0.578571	67.8632	-0.678947	94.1495	-8.06154	162.578	-2.33333	69.5796	-2.53248
389.585	0.646154	67.1333	-1.83333	92.2784	-8.21569	164.252	-2.60474	68.716	-2.20741
389.554	0.676923	66.8118	-2.02941	91.6463	-7.53388	164.104	-2.56872	68.5439	-2.52866
389.553	0.633333	66.1043	-4.36087	91.9645	-7.00968	163.646	-2.56232	68.9733	-2.72052
390	0.736066	65.6222	-4.23333	91.1107	-7.27934	163.335	-2.52293	68.7622	-2.6671
390.575	0.74	65.6667	-4.54444	90.8286	-7.23492	163.186	-2.4678	68.5937	-2.59497
389.746	1.66098	65.968	-1.748	92.4504	-6.77795	162.597	-2.60324	68.7467	-2.78095
388.562	3.9625	65.3412	-4.64118	92.964	-6.31655	161.759	-2.71204	69.7581	-2.64983
384.648	7.708	67.4667	5.03333	94.8976	-6.18211	160.916	-2.71214	70.6328	-2.60334
382.073	10.7776	64.1143	-5.3	96.0892	-5.37538	160.233	-2.88706	70.9347	-2.61581
378.159	10.8492	64.48	-4.86	96.7861	-5.0887	159.961	-2.82614	70.7607	-2.46557
375.312	9.42267	67.4333	10.6333	93.6	-5.22069	160.203	-2.77714	68.6826	-0.58157
373.133	9.58095	68.45	9.5	89.6083	-5.75	161.438	-3.17908	63.8898	2.0682
371.815	9.77179	69.2667	15.4333	83.332	-3.704	164.099	-2.52658	58.9381	3.45277
370.239	9.02683	69.9273	17.3182	76.548	-1.34	165.293	-2.67467	54.2541	4.84277
369.014	7.38095	68.2286	13.9	73.7333	3.49412	164.808	-2.30204	48.6465	5.64654
367.059	4.15405	62.08	-1.06	67.9673	3.78909	163.076	-1.54937	42.651	6.08662
366.069	-0.0257143	62.2545	11.5364	64.1424	3.17966	162.106	-0.746012	37.5314	5.51419
365.357	-0.0442623	56.8	10.5783	61.5743	-0.282569	159.71	0.745055	33.3265	3.33806
364.691	0.00909091	54.85	18.325	55.9126	-8.3908	155.947	3.2	28.4352	-0.480782
364.033	0.149315	44.3294	3.02941	54.2532	-8.76962	151.294	3.05846	25.3351	-3.77297
363.719	0.129851	39.0476	3.19524	55.4877	-7.42456	145.582	4.632	24.1243	-3.93649
363.06	0.113333	34	4.58108	53.3947	-8.51053	141.665	2.97753	21.8943	-3.61605
363.079	0.136364	30.1053	2.99474	52.6466	-8.53151	136.321	2.33737	18.7	-3.80411
362.501	0.0733333	27.136	1.164	49.888	-8.95467	129.262	2.69565	18.0701	-4.10722
362.442	0.136364	22.88	-2.68667	52.6565	-8.18261	124.34	1.76636	18.09	-4.12605
362.284	0.142105	21.5429	-4.84286	48.5013	-10.2582	119.407	0.470909	18.1053	-4.04267
362.275	0.195	20.4667	-4.55	48.4752	-10.198	114.654	-1.78957	18.1759	-3.81107
362.306	0.2	17.7143	-5.32857	49.7278	-9.49691	112.9	-3.01972	17.9949	-4.20958
362.412	0.250725	18.1556	-5.1	50.7333	-8.98222	112.862	-3.22927
362.336	0.2	18.6105	-4.76316	47.5181	-9.79759	113.465	-3.13237
362.347	0.26	19.3419	-2.65484	49.0762	-9.24286	114.86	-2.93268
362.516	0.23913	18.5419	-4.59032	47.3156	-9.72	111.973	-2.32727
362.315	0.209091	17.9765	-5.04118	50.6346	-7.85	109.552	-2.84771
362.472	0.183582	17.64	-4.72	46.5245	-8.89057	109.508	-2.94706
362.5	0.2375	17.3333	-5.22	46.1289	-7.99669	109.509	-2.69815
362.386	0.201695	17.1077	-5.48462	45.6156	-8.43125	109.751	-2.72
362.332	0.181356	17.2381	-4.9381	46.9802	-7.43511	109.769	-2.55289
362.263	0.45443	16.6286	-5.15714	47.165	-6.99854	109.651	-2.60905
362.241	0.439726	16.9053	-5.32105	46.7639	-7.19398	109.99	-2.41481
362.25	0.455556	16.3692	-5.60769	47.8607	-7.29481	110.127	-2.69551
361.944	0.392958	15.4286	-5.01429	48.9067	-6.52741	111.83	-2.69027
361.906	0.516667	15.9	-5.65	50.8836	-5.94925	113.283	-2.85849
362.108	0.474603	16.24	-5.94	50.5862	-6.35862	115.764	-2.87477
361.757	0.395082	16.1714	-5.75714	47.7323	-5.64839	115.587	-2.94074
361.752	0.506897	17.12	-5.94	42.9206	-3.69206	115.184	-2.99636
361.53	0.310526	18.2667	-6.23333	37.0883	-1.83063	114.883	-2.98491
361.724	0.237931	17.6	-5.03333	31.8881	1.14237	114.533	-3.07664
361.594	0.266154			25.9714	1.79643	113.971	-3.0441
361.582	0.285075			23.7806	4.37742	113.032	-3.19623
361.869	0.185246			16.9382	0.92	112.079	-3.43168
362.469	0.16875					111.689	-3.51702
363.345	0.286207					111.485	-3.1573
363.267	0.440741					111.648	-3.46811
361.389	1.75283					114.132	-3.61978
359.377	4.68361					116.779	-3.5329
356.498	8.24769					116.872	-3.22051
352.95	9.83889					115.777	-2.79744
349.982	8.98824					113.848	-1.36774
347.042	8.65263					113.258	-0.806977
345.2	9.60952					110.256	0.415166
343.721	9.04419					105.988	1.69064
342.105	8.42					101.428	2.15415
340.337	7.06316					95.7121	2.25172
338.569	2.26					91.0452	2.0313
337.78	-0.602041					85.0919	1.92796
336.429	-0.660976					78.4946	1.88571
336.646	-0.474359					73.6415	0.858091
336.277	-0.569231					68.9012	-1.23154
335.835	-0.490476					63.6097	-3.89032
335.445	-0.506452					62.8301	-4.07364
335.187	-0.426667					63.0749	-4.13827
334.675	-0.583333					63.6116	-4.01818
334.656	-0.556					65.2901	-3.75494
334.53	-0.384507					62.2502	-2.42469
334.419	-0.325397					60.8321	-3.8988
334.452	-0.416129					60.8327	-3.97388
334.299	-0.383582					60.861	-3.69322
334.243	-0.364865					60.8768	-3.608
334.254	-0.363415					60.8346	-3.6
334.691	-0.269697					60.8967	-3.63443
334.64	-0.242857					60.807	-3.52247
334.848	-0.327586					61.3467	-3.48333
334.728	-0.294444					62.1705	-3.69672
334.292	-0.305128					65.1703	-3.72576
334.28	-0.275					65.1391	-3.73913
334.314	-0.218987					64.8425	-3.50442
334.184	-0.186486					64.4258	-3.49862
334.07	-0.204762					63.9489	-3.66167
334.069	-0.0530864					63.2661	-3.38036
333.882	0.631765					62.6936	-4.10815
333.8	-0.0684211					61.7367	-3.95377
333.8	-0.0655172					61.1935	-4.23656
333.298	-0.0754386					60.8484	-4.16815
333.7	-0.217647					61.0212	-4.33966
333.373	-0.260784					61.6965	-4.39598
332.945	1.0617					64.4096	-4.33493
333.408	-0.215385					65.6287	-3.70166
333.621	-0.224138					65.7258	-4.45155
334.611	-0.173684					64.2047	-3.40469
335.359	-0.224138					63.5245	-2.04694
335.6	-0.0269841					61.4318	1.47664
334.037	1.25349					57.7292	0.306195
331.912	4.1					53.1804	0.892857
328.928	7.46111					48.5229	1.05455
325.159	9.3					43.0471	0.947556
321.316	8.35806					37.7382	1.27636
319.057	7.91905					31.3131	1.15105
317.2	8.72927					25.3577	1.13859
315.605	8.12927					20.376	0.4016
313.942	7.11856					15.9055	-1.72126
312.434	4.65211					10.7468	-4.4412
310.907	0.12					10.0569	-5.05613
310.376	-1.23061					10.2234	-4.93736
309.2	-1.04839					11.0206	-4.90882
308.814	-1.1					12.6662	-4.74875
308.513	-1.06667					9.42636	-4.29612
307.763	-0.964407					8.51324	-4.84559
307.627	-0.973973					8.52782	-4.83459
307.031	-0.942254
306.881	-0.166667
306.812	-0.9875
306.806	-0.975
306.861	-0.938889
306.848	-0.934667
306.764	-0.986567
306.841	-0.989855
306.959	-0.935294
306.851	-0.953968
306.879	-0.955738
306.813	-1.01333
306.412	-0.906061
306.383	-0.931884
306.551	-0.862162
306.267	-0.917544
306.4	-0.734286
306.214	-0.728986
306.031	-0.743077
306.155	-0.753731
306.954	-0.158462
306.654	-0.213514
305.731	-0.75625
305.851	-0.741791
305.753	-0.864706
305.857	-0.866038
305.67	-0.826984
305.667	-0.966667
306.581	-0.903774
307.36	-0.816364
306.32	-0.26
304.583	1.08261
302.406	4.59444
299.02	7.88551
295.173	9.6027
292.365	7.72899
289.972	8.6977
288.338	8.42857
286.391	7.63043
284.66	6.53636
282.919	3.5875
281.467	-1.57407
280.298	-2.00847
280.213	-1.85556
279.581	-1.7625
279.149	-1.81392
278.328	-1.69444
277.908	-1.9
277.684	-1.69355
277.594	-1.71493
277.311	-1.68333
277.335	-1.66216
277.318	-1.65294
277.359	-1.62063
277.376	-1.60588
277.2	-0.717391
277.412	-1.58824
277.336	-1.73059
277.113	-1.70723
276.935	-1.64026
276.93	-1.62958
277.016	-1.61053
276.926	-1.58219
276.646	-1.52051
276.421	-0.641333
276.619	-1.45068
276.578	-1.49459
276.242	-1.65152
276.143	-1.55373
276.171	-1.46571
276.109	-1.44286
276.155	-1.59677
276.214	-1.63571
276.207	-1.66429
276.151	-1.63115
276.246	-1.75965
277.207	-1.55926
277.502	-1.58421
276.18	-0.683673
274.213	1.75333
271.429	5.32857
267.819	7.86774
264.517	7.156
261.508	6.55128
259.304	7.3987
257.792	6.86056
255.795	6.8561
253.9	5.885
252.745	0.981818
251.789	-2.71509
250.97	-1.73704
250.438	-2.72264
249.6	-1.66604
248.794	-1.95294
248.709	-1.90533
248.175	-1.80986
247.629	-2.58571
247.659	-2.58824
247.307	-2.51333
247.284	-1.75789
247.144	-2.55915
247.211	-2.62432
247.384	-2.60526
247.184	-2.5961
247.261	-2.55556
247.233	-1.77778
247.356	-1.77778
247.086	-2.58571
247.109	-2.54
247.006	-2.47778
246.823	-2.53662
246.906	-2.43333
246.823	-2.42394
247.484	-1.84737
247.781	-1.81233
246.434	-2.32857
246.206	-2.39714
246.111	-1.23333
245.769	-1.50678
245.772	-0.638462
247.123	-1.57719
245.764	-1.5918
245.803	-1.50678
247.04	-2.48
247.81	-1.4661
247.933	-0.466667
246.604	-0.677358
244.69	0.3
242.171	4.40714
238.62	6.72
234.894	6.08889
231.986	5.54096
229.564	6.37273
227.893	6.17442
226.079	5.74651
224.495	3.96842
222.944	1.86111
221.819	-3.6125
221.126	-3.61429
220.574	-1.67971
219.803	-1.7209
219.564	-1.89487
218.968	-2.62973
218.882	-2.60685
219.667	-1.85
218.388	-2.44328
218.254	-2.47297
218.305	-3.24
218.23	-2.57
217.94	-3.33
217.905	-3.32381
218.121	-3.27209
218.081	-3.30952
218.359	-1.19195
218.177	-2.5961
218.057	-3.41169
217.949	-0.887342
217.624	-3.39091
217.484	-3.32278
217.473	-3.22152
217.326	-3.20526
217.293	-2.23973
217.105	-3.17895
216.986	-2.40141
217.937	-2.52857
217.754	-2.45385
216.652	-3.18
216.658	-3.2871
216.751	-3.29077
216.705	-3.33051
216.682	-3.28235
216.954	-2.38615
218.211	0.968571
218.066	-3.2791
217.2	-2.9
215.113	-0.74
212.287	2.70667
208.705	5.81364
205.482	5.90845
202.013	7.5913
199.651	5.83617
197.964	6.396
196.379	6.16667
194.761	4.57229
193.538	2.75128
192.186	-0.137209
190.877	-2.23684
189.93	-4.19474
189.448	-4.0697
188.807	-4.1963
188.303	-3.05484
188.478	-1.37463
188.28	-0.58
187.701	-4.092
187.793	-4.06386
187.66	-4.04713
187.543	-4.09048
187.229	-4.05429
187.653	-1.32353
187.093	-4.00667
187.771	-3.90635
187.844	-4.14375
187.858	-3.98219
187.491	-3.83939
187.316	-3.97089
187.271	-2.06986
187.144	-2.09487
187.424	-2.90267
187.257	-3.79714
186.766	2.59639
186.794	-2.90556
186.769	-4.03125
186.647	-2.91333
186.572	-3.86308
186.351	-3.86923
186.446	-3.03714
186.491	-3.97273
186.569	-3.99492
186.258	-1.81864
187.519	-3.94746
188.421	-2.72807
187.509	1.74242
186.637	-0.00612245
184.441	0.466102
180.692	5.49294
177.402	6.30235
174.153	4.28082
170.767	4.15647
168.82	5.88614
167.232	7.23131
165.473	3.77059
163.975	2.88987
163.54	0.428358
161.295	-2.77458
160.1	-4.9625
159.289	-4.94444
158.827	-5.01892
159.314	-3.53333
158.055	-4.2
157.8	-2.9
157.96	-3.10571
157.2	-3.84545
157.227	-3.95867
157.227	-4.18764
157.397	-4.028
157.101	-4.86986
156.67	-4.86623
157.297	-4.82
157.622	-2.30541
157.832	-2.28919
157.252	-3.99275
157.423	-4.86104
157.43	-3.165
157.138	-4.76753
157.039	-4.61111
156.822	-4.53014
156.859	-4.42973
156.839	-3.41667
156.497	-4.36486
156.551	-3.33188
156.352	-3.6791
156.166	-4.57586
157.982	-3.15455
155.771	-4.54762
156.173	-3.65333
155.987	-3.67705
155.862	-4.71311
156.36	-3.62
157.444	-4.56667
157.321	-4.45849
155.893	-3.49286
153.227	-0.793333
150.189	3.54211
146.628	4.33291
143.028	3.42778
139.912	3.33516
137.952	4.57391
136.395	5.23412
134.829	5.1
133.672	3.85579
131.647	1.83617
129.727	-3.88
130.282	-2.42958
128.445	-4.77097
127.896	-4.96667
127.53	-5.76667
126.735	-5.64
126.519	-5.65584
126.371	-5.57229
126.302	-5.51333
126.265	-5.5
127.831	-2.36118
125.948	-5.60753
126.154	-4.76265
125.796	-5.56522
125.841	-5.51446
125.842	-5.71972
126.228	-4.73333
125.974	-4.70526
125.803	-5.44805
127.783	-3.20864
126.683	-3.02195
126.776	-3.9
125.519	-3.98539
125.359	-5.42727
125.278	-5.39268
126.144	-4.92921
125.058	-5.40526
124.941	-4.42973
126.5	-3.80526
126.316	-3.88421
126.563	-4.00704
124.633	-5.40448
124.681	-5.36269
124.681	-5.36269
125.072	-5.28551
125.836	-5.44754
125.148	-5.18525
123.097	-4.18571
120.27	-0.446479
117.164	3.188
113.39	3.90202
109.978	2.55275
107.332	4.81193
105.461	2.78632
103.31	2.11524
101.842	1.22967
99.508	-1.78046
98.5733	-6.42
97.8413	-5.76667
96.35	-6.69375
95.9429	-6.67714
95.4831	-6.67538
94.9561	-6.65122
94.8706	-5.60588
94.8889	-3.92778
94.3253	-6.57733
94.83	-5.085
94.6815	-6.62099
94.5442	-6.64419
94.2265	-6.68072
94.2711	-5.9
94.1256	-6.53721
94.1926	-5.80617
94.3045	-5.89545
94.1888	-5.94494
94.0691	-5.76173
94.0598	-5.78506
93.686	-6.54516
93.7289	-6.52667
93.5792	-6.63766
93.4056	-6.48889
93.5532	-6.35714
94.0764	-5.92247
93.2571	-6.27922
92.8753	-6.29059
96.3619	-4.02381
94.3442	-5.16512
94.4238	-4.47619
92.6466	-6.4863
93.6108	-5.85676
93.6732	-5.80986
93.0813	-6.575
95.4727	-5.84545
95.9222	-5.75
97.0448	-3.6791
92.2383	-3.05745
89.2819	1.00602
85.0043	3.10426
81.0882	2.41828
77.5556	1.41852
74.7048	1.8219
72.6351	1.01228
70.8889	1.24872
69.288	-1.376
66.7514	-6.3
66.4116	-7.22174
65.5952	-7.14762
64.6607	-7.86854
64.3696	-7.1
63.8353	-7.76471
63.5045	-7.86364
62.9642	-7.84526
62.3429	-7.22653
62.4245	-7.80612
62.4	-7.74646
62.4593	-6.66667
62.7759	-7.08072
62.299	-7.16465
62.1793	-6.97126
62.2621	-6.35057
62.2122	-7.77347
62.1458	-7.84167
62.228	-7.224
62.3074	-6.41789
61.8429	-7.75714
62.7529	-6.91647
61.6833	-6.85833
61.6533	-7.50889
61.5882	-6.83725
61.3933	-7.48652
61.2791	-6.62093
62.0537	-6.70976
61.0377	-7.63913
60.7022	-7.57111
60.5318	-7.47176
60.6805	-7.44286
60.6368	-7.72105
60.5143	-7.67662
60.5915	-7.66338
60.9211	-7.62632
62.1333	-7.51212
63.4595	-6.80811
62.4645	-5.86774
58.5879	-4.15455
55.0857	-0.1
51.9227	2.08636
47.9907	1.7
44.9442	1.23953
42.251	2.13529
40.4255	2.28909
38.6811	2.49279
37.0182	1.54364
35.2272	-0.781553
33.4192	-4.81154
33.8571	-3.25238
32.0213	-9.18
30.9813	-9.04667
30.7229	-8.38193
30.0977	-9.02093
29.75	-9.07222
29.5854	-9.05122
29.3773	-8.95
29.5175	-8.26289
29.2604	-8.94151
29.2495	-9.05052
28.9136	-9.04091
28.7052	-9.04227
