# Supplementary material for: A Framework for Soft Mechanism Driven Robots
Source: Research Square preprint supplement (doi:10.21203/rs.3.rs-4109720/v1), 2024-03-28
Supplement: Supplementary file 3 [file all_data.xlsx]

## Sheet: Sheet1
IdealX	IdealY	AN_X	AN_Y	CN_X	CN_Y	AC_X	AC_Y	AC_IP_X	AC_IP_Y	AN_IP_X	AN_IP_Y	CN_IP_X	CN_IP_Y
24.817	11.1153	1.02192	9.22842	1.02192	9.22842	1.02192	9.22842	5.44734	2.1149	24.1704	10.3197	23.744	6.96874
24.7336	11.1429	2.08055	9.78861	2.2493	9.80358	1.98563	9.78038	7.2811	1.73675	24.1937	10.3164	23.6811	6.91744
24.6466	11.1694	3.38947	10.2704	3.74554	10.3096	3.20108	10.2508	8.66939	1.57098	24.2656	10.2895	23.7326	6.91106
24.556	11.1948	4.91842	10.6715	5.47337	10.7474	4.64277	10.6368	10.3417	1.56242	24.1183	10.373	23.8146	6.97899
24.462	11.2191	6.6305	10.9931	7.38725	11.1202	6.28059	10.9397	12.3326	1.86019	24.1978	10.3112	23.7796	7.05024
24.3645	11.2424	8.48489	11.2388	9.43928	11.4331	8.07819	11.164	14.3588	2.37723	23.9039	10.4712	23.676	6.9829
24.2636	11.2647	10.4384	11.4142	11.5792	11.6912	9.99383	11.3168	16.1453	2.98084	23.8756	10.507	23.6741	6.87631
24.1593	11.286	12.446	11.5258	13.7555	11.8995	11.9813	11.4059	17.5825	3.76975	24.0353	10.409	23.7349	6.94071
24.0516	11.3063	14.4606	11.5796	15.9165	12.0609	13.9905	11.4389	18.9454	4.69241	24.2039	10.3247	23.7306	7.02106
23.9406	11.3257	16.4345	11.5806	18.0104	12.176	15.9692	11.421	20.291	5.67457	24.1856	10.3389	23.6211	7.00969
23.8263	11.3441	18.3187	11.5309	19.9862	12.2417	17.8638	11.3543	21.2896	6.70751	24.2233	10.3277	23.6011	6.92111
23.7088	11.3617	20.0649	11.4292	21.7949	12.2506	19.6214	11.2368	21.9927	7.75341	24.1272	10.3978	23.6781	6.92286
23.5881	11.3783	21.6268	11.2703	23.3908	12.1916	21.1922	11.0625	22.4845	8.79788	24.2291	10.322	23.7169	7.00046
23.4642	11.3941	22.9621	11.046	24.7337	12.0504	22.5317	10.8222	22.5496	9.63553	24.2005	10.3356	23.6441	7.0226
23.3372	11.4091	24.0347	10.7461	25.79	11.8117	23.6029	10.5053	22.4398	10.4964	24.2348	10.3421	23.6241	6.99151
23.2072	11.4233	24.8162	10.3611	26.5345	11.462	24.3775	10.1024	21.7778	11.2308	24.0406	10.4306	23.6915	6.94064
23.0741	11.4366	25.2871	9.88416	26.9507	10.9922	24.837	9.60769	20.1403	11.9997	24.0236	10.4103	23.7162	6.94913
22.938	11.4492	25.4365	9.31369	27.031	10.4005	24.9725	9.02136	16.336	12.4239	23.9921	10.4227	23.6659	7.00001
22.799	11.461	25.262	8.65499	26.7753	9.69389	24.7838	8.3508	13.5837	12.4062	24.1914	10.4409	23.623	6.99697
22.6572	11.4722	24.7693	7.92118	26.1912	8.88855	24.2793	7.61125	10.8263	12.285	23.9021	10.9098	23.6635	6.95863
22.5125	11.4825	23.971	7.13251	25.2917	8.00898	23.4738	6.82462	8.14099	11.9934	23.218	11.3851	23.7177	6.93873
22.365	11.4922	22.8885	6.31783	24.0987	7.08925	22.3913	6.02087	5.73552	11.5704	21.9743	11.8072	23.6605	6.99422
22.2148	11.5013	21.5461	5.50755	22.6359	6.165	21.0585	5.2307	3.86397	11.0511	18.8333	12.0212	23.616	7.00901
22.0619	11.5096	19.9762	4.7366	20.9359	5.27672	19.5102	4.48846	2.79092	10.7321	15.6117	12.0014	23.6553	6.9763
21.9064	11.5174	18.2166	4.03941	19.0369	4.46417	17.7857	3.82712	2.25952	10.4929	12.9157	11.7949	23.6835	6.94392
21.7483	11.5245	16.3104	3.44801	16.9831	3.76419	15.9293	3.27647	1.45562	9.89968	10.1437	11.4523	23.6887	6.97057
21.5877	11.531	14.3057	2.98985	14.8249	3.20844	13.9887	2.86104	0.608958	9.17352	10.1447	11.4557	23.5981	7.00381
21.4247	11.5369	12.2545	2.68582	12.6175	2.82092	12.0136	2.59859	-0.00933029	8.34329	7.56033	11.1038	23.604	7.01518
21.2592	11.5422	10.2106	2.54884	10.4191	2.6166	10.0546	2.49908	-0.265498	7.45491	5.17966	10.6582	24.4585	7.63472
21.0914	11.5469	8.22826	2.58306	8.2888	2.60026	8.16073	2.56432	-0.237358	6.55921	3.06787	10.1242	25.366	8.55878
20.9213	11.5511	6.35898	2.78383	6.28368	2.76655	6.37797	2.78832	0.155107	5.61517	1.71594	9.54545	26.0058	9.52097
20.7489	11.5548	4.64993	3.13839	4.45605	3.10086	4.7478	3.15814	0.80024	4.64777	1.37846	9.25564	26.3013	10.4131
20.5744	11.558	3.14204	3.62734	2.85135	3.58102	3.30623	3.65517	1.69526	3.77399	0.841292	8.86399	26.2893	11.1763
20.3978	11.5606	1.86923	4.22638	1.50728	4.17955	2.08339	4.25658	3.79801	2.7415	0.104615	8.11272	25.7783	11.8038
20.2191	11.5627	0.85843	4.9082	0.453534	4.86597	1.10357	4.93683	5.50449	2.1556	-0.221251	7.23952	24.7688	12.3284
20.0384	11.5643	0.129979	5.64425	-0.287476	5.609	0.38542	5.66905	7.26007	1.78933	-0.296488	6.36552	22.0401	12.3217
19.8557	11.5654	-0.301767	6.40628	-0.69994	6.37834	-0.057563	6.42636	8.63326	1.60375	0.0941997	5.54487	18.7355	12.639
19.6712	11.5661	-0.428121	7.16768	-0.774321	7.1463	-0.216791	7.18298	10.2445	1.57753	0.791653	4.62826	15.7553	12.554
19.4848	11.5662	-0.246172	7.90458	-0.507687	7.88906	-0.088414	7.91528	12.3293	1.8442	1.86194	3.64446	12.9641	12.3798
19.2966	11.5659	0.240676	8.5968	0.095382	8.58763	0.326576	8.60269			3.62959	2.70933	10.1226	12.0961
19.1068	11.5651	1.02201	9.22851	1.02171	9.22849	1.02202	9.22851			5.37307	2.08263	7.44981	11.7053
18.9152	11.5639									7.28289	1.6874	5.03528	11.188
18.7221	11.5622									8.864	1.55198	2.85548	10.5554
18.5275	11.56									10.409	1.46565	1.8139	9.90276
18.3314	11.5574									12.5275	1.65653	1.54642	9.67952
18.1338	11.5543									14.7099	2.17109	0.809499	9.13959
17.935	11.5508									16.8658	2.99894	-0.000723852	8.26235
17.7348	11.5467									18.8246	3.96024	-0.296988	7.30273
17.5333	11.5423									20.537	5.05356	-0.0712409	6.27985
17.3307	11.5374									21.9814	6.11844	0.651554	5.22101
17.127	11.532									23.1515	7.21093	1.81098	4.12429
16.9222	11.5261									23.9764	8.28174	3.28018	3.12496
16.7164	11.5197									24.4253	9.26329	5.37264	2.3517
16.5097	11.5129									24.5524	10.1578	6.8619	2.12001
16.302	11.5056									24.2206	10.858	8.1295	1.92554
16.0936	11.4978									23.4278	11.4263	9.75008	1.76952
15.8843	11.4895									21.6158	11.8278	12.0449	1.90541
15.6743	11.4807											14.5132	2.4586
15.4637	11.4714											16.8215	3.17958
15.2525	11.4616											19.108	4.18019
15.0407	11.4512											19.1158	4.18621
14.8284	11.4403											21.0619	5.2533
14.6157	11.4289											22.8104	6.50071
14.4026	11.4169											24.0779	7.65114
14.1892	11.4043											24.9649	8.73007
13.9755	11.3912											25.4012	9.74625
13.7616	11.3775											25.4118	10.5822
13.5475	11.3632
13.3334	11.3483
13.1191	11.3327
12.9049	11.3166
12.6907	11.2998
12.4766	11.2824
12.2626	11.2643
12.0489	11.2455
11.8354	11.2261
11.6222	11.2059
11.4093	11.1851
11.1969	11.1635
10.985	11.1413
10.7735	11.1183
10.5626	11.0945
10.3523	11.07
10.1427	11.0448
9.93376	11.0187
9.7256	10.9919
9.51823	10.9643
9.31172	10.9359
9.10611	10.9066
8.90145	10.8766
8.69779	10.8457
8.49517	10.814
8.29365	10.7815
8.09326	10.7481
7.89407	10.7138
7.69611	10.6787
7.49944	10.6427
7.3041	10.6059
7.11014	10.5681
6.9176	10.5295
6.72653	10.49
6.53699	10.4495
6.34901	10.4082
6.16265	10.366
5.97794	10.3229
5.79495	10.2789
5.61371	10.234
5.43427	10.1881
5.25669	10.1414
5.081	10.0937
4.90725	10.0451
4.7355	9.99564
4.56578	9.94524
4.39815	9.89394
4.23265	9.84174
4.06934	9.78863
3.90825	9.73461
3.74944	9.67971
3.59296	9.62391
3.43884	9.56722
3.28715	9.50965
3.13793	9.45121
2.99122	9.39189
2.84708	9.33171
2.70555	9.27068
2.56668	9.2088
2.43052	9.14607
2.29712	9.08252
2.16653	9.01815
2.03879	8.95297
1.91396	8.88698
1.79209	8.82021
1.67321	8.75267
1.55739	8.68436
1.44466	8.6153
1.33509	8.54551
1.22871	8.47499
1.12557	8.40377
1.02573	8.33186
0.929231	8.25927
0.836121	8.18603
0.746448	8.11215
0.660259	8.03764
0.577601	7.96254
0.498521	7.88686
0.423065	7.81061
0.351278	7.73382
0.283207	7.65652
0.218894	7.57872
0.158385	7.50045
0.101721	7.42173
0.0489464	7.34259
0.000101402	7.26305
-0.0447733	7.18314
-0.0856381	7.10288
-0.122455	7.02231
-0.155186	6.94145
-0.183796	6.86034
-0.208249	6.77899
-0.228514	6.69745
-0.244557	6.61574
-0.25635	6.5339
-0.263862	6.45196
-0.267069	6.36995
-0.265945	6.28791
-0.260466	6.20588
-0.250613	6.12389
-0.236366	6.04197
-0.217708	5.96017
-0.194626	5.87852
-0.167107	5.79707
-0.135141	5.71585
-0.0987213	5.6349
-0.0578427	5.55426
-0.0125033	5.47397
0.0372967	5.39409
0.0915542	5.31464
0.150263	5.23567
0.213416	5.15723
0.281	5.07936
0.353002	5.0021
0.429406	4.9255
0.510191	4.8496
0.595335	4.77445
0.684813	4.70008
0.778597	4.62656
0.876656	4.55392
0.978958	4.4822
1.08546	4.41146
1.19614	4.34173
1.31094	4.27307
1.42982	4.20551
1.55273	4.13911
1.67963	4.0739
1.81047	4.00992
1.94519	3.94723
2.08373	3.88587
2.22604	3.82587
2.37206	3.76727
2.52172	3.71013
2.67497	3.65447
2.83173	3.60034
2.99194	3.54778
3.15553	3.49682
3.32243	3.4475
3.49256	3.39986
3.66586	3.35393
3.84224	3.30974
4.02164	3.26733
4.20398	3.22673
4.38917	3.18796
4.57714	3.15107
4.76781	3.11607
4.9611	3.08299
5.15693	3.05186
5.35522	3.02271
5.55587	2.99555
5.75882	2.9704
5.96398	2.9473
6.17126	2.92625
6.38059	2.90727
6.59187	2.89038
6.80502	2.8756
7.01997	2.86293
7.23662	2.85239
7.45489	2.844
7.6747	2.83775
7.89596	2.83366
8.11859	2.83173
8.34252	2.83197
8.56764	2.83438
8.79389	2.83896
9.02118	2.84572
9.24942	2.85464
9.47854	2.86574
9.70845	2.87901
9.93908	2.89443
10.1703	2.91202
10.4022	2.93174
10.6344	2.95361
10.8671	2.9776
11.1001	3.00371
11.3334	3.03192
11.5668	3.06222
11.8003	3.09459
12.0338	3.12901
12.2672	3.16547
12.5005	3.20395
12.7336	3.24442
12.9664	3.28686
13.1989	3.33126
13.4309	3.37758
13.6624	3.42579
13.8933	3.47588
14.1237	3.52782
14.3533	3.58157
14.5821	3.6371
14.8101	3.69439
15.0372	3.7534
15.2633	3.81409
15.4883	3.87644
15.7123	3.94041
15.9351	4.00596
16.1566	4.07306
16.3769	4.14166
16.5958	4.21173
16.8133	4.28323
17.0293	4.35611
17.2438	4.43034
17.4567	4.50587
17.668	4.58266
17.8775	4.66067
18.0853	4.73985
18.2912	4.82016
18.4953	4.90156
18.6975	4.98398
18.8977	5.0674
19.0958	5.15176
19.2919	5.23701
19.4858	5.3231
19.6776	5.41
19.8671	5.49764
20.0543	5.58598
20.2392	5.67497
20.4218	5.76456
20.6019	5.8547
20.7795	5.94534
20.9546	6.03643
21.1272	6.12792
21.2971	6.21975
21.4645	6.31188
21.6291	6.40426
21.791	6.49683
21.9501	6.58955
22.1064	6.68236
22.2598	6.77522
22.4104	6.86807
22.558	6.96087
22.7027	7.05357
22.8443	7.14611
22.9829	7.23845
23.1185	7.33054
23.2509	7.42233
23.3802	7.51378
23.5063	7.60484
23.6292	7.69546
23.7488	7.78561
23.8652	7.87522
23.9783	7.96426
24.088	8.05269
24.1944	8.14047
24.2973	8.22755
24.3969	8.31389
24.493	8.39946
24.5856	8.48421
24.6747	8.56812
24.7603	8.65113
24.8423	8.73323
24.9207	8.81436
24.9956	8.89451
25.0668	8.97364
25.1344	9.05172
25.1984	9.12872
25.2586	9.20461
25.3152	9.27938
25.368	9.35298
25.4171	9.42541
25.4625	9.49663
25.504	9.56663
25.5419	9.63539
25.5759	9.70288
25.6061	9.76911
25.6325	9.83404
25.6551	9.89767
25.6738	9.95999
25.6888	10.021
25.6998	10.0806
25.707	10.139
25.7104	10.1959
25.7099	10.2516
25.7055	10.3058
25.6973	10.3588
25.6853	10.4103
25.6693	10.4605
25.6496	10.5094
25.6259	10.5569
25.5985	10.6031
25.5671	10.648
25.532	10.6915
25.4931	10.7337
25.4503	10.7747
25.4038	10.8143
25.3534	10.8526
25.2993	10.8897
25.2415	10.9256
25.18	10.9602
25.1147	10.9935
25.0457	11.0257
24.9731	11.0567
24.8969	11.0866
24.817	11.1153
