# Supplementary material for: A Framework for Soft Mechanism Driven Robots
Source: Research Square preprint supplement (doi:10.21203/rs.3.rs-4109720/v1), 2024-03-28
Supplement: Supplementary file 4 [file Stress_versus_Extension_alldata.xlsx]

## Sheet: Sheet1
Rigid		Flexible
		Time	Stress
		(s)	(MPa)
		0	0
		0.1	0
		0.2	0
		0.3	0
		0.4	0
		0.5	0
		0.6	0
		0.7	0
		0.8	0
		0.9	0
		1	0
		1.1	0
		1.2	0
		1.3	0
		1.4	0
		1.5	9.80665e-05
		1.6	9.80665e-05
		1.7	9.80665e-05
		1.8	9.80665e-05
		1.9	0.000196133
		2	0.000196133
		2.1	0.000294199
		2.2	0.000294199
		2.3	0.000392266
		2.4	0.000392266
		2.5	0.000490332
		2.6	0.000490332
		2.7	0.000588399
		2.8	0.000588399
		2.9	0.000686465
		3	0.000686465
		3.1	0.000784532
		3.2	0.000784532
		3.3	0.000882599
		3.4	0.000980665
		3.5	0.00107873
		3.6	0.00107873
		3.7	0.0011768
		3.8	0.00127486
		3.9	0.00137293
		4	0.00137293
		4.1	0.001471
		4.2	0.00156906
		4.3	0.00166713
		4.4	0.0017652
		4.5	0.0017652
		4.6	0.00186326
		4.7	0.00196133
		4.8	0.0020594
		4.9	0.0020594
		5	0.00215746
		5.1	0.00225553
		5.2	0.0023536
		5.3	0.00245166
		5.4	0.00254973
		5.5	0.00254973
		5.6	0.0026478
		5.7	0.00274586
		5.8	0.00284393
		5.9	0.00294199
		6	0.00304006
		6.1	0.00304006
		6.2	0.00313813
		6.3	0.00323619
		6.4	0.00333426
		6.5	0.00343233
		6.6	0.00343233
		6.7	0.00353039
		6.8	0.00362846
		6.9	0.00372653
		7	0.00372653
		7.1	0.00382459
		7.2	0.00392266
		7.3	0.00402073
		7.4	0.00411879
		7.5	0.00411879
		7.6	0.00421686
		7.7	0.00421686
		7.8	0.00431493
		7.9	0.00441299
		8	0.00451106
		8.1	0.00451106
		8.2	0.00451106
		8.3	0.00451106
		8.4	0.00451106
		8.5	0.00460913
		8.6	0.00460913
		8.7	0.00460913
		8.8	0.00470719
		8.9	0.00470719
		9	0.00470719
		9.1	0.00470719
		9.2	0.00480526
		9.3	0.00480526
		9.4	0.00480526
		9.5	0.00490333
		9.6	0.00490333
		9.7	0.00490333
		9.8	0.00490333
		9.9	0.00490333
		10	0.00480526
		10.1	0.00480526
		10.2	0.00480526
		10.3	0.00470719
		10.4	0.00460913
		10.5	0.00431493
		10.6	0.00431493
		10.7	0.00441299
		10.8	0.00441299
		10.9	0.00451106
		11	0.00451106
		11.1	0.00460913
		11.2	0.00460913
		11.3	0.00460913
		11.4	0.00470719
		11.5	0.00480526
		11.6	0.00480526
		11.7	0.00490333
		11.8	0.00490333
		11.9	0.00490333
		12	0.00500139
		12.1	0.00509946
		12.2	0.00509946
		12.3	0.00509946
		12.4	0.00509946
		12.5	0.00519752
		12.6	0.00519752
		12.7	0.00519752
		12.8	0.00519752
		12.9	0.00529559
		13	0.00529559
		13.1	0.00529559
		13.2	0.00529559
		13.3	0.00529559
		13.4	0.00529559
		13.5	0.00529559
		13.6	0.00529559
		13.7	0.00529559
		13.8	0.00529559
		13.9	0.00529559
		14	0.00529559
		14.1	0.00529559
		14.2	0.00372653
		14.3	0.00323619
		14.4	0.00333426
		14.5	0.00343233
		14.6	0.00343233
		14.7	0.00333426
		14.8	0.00304006
		14.9	0.00127486
		15	0.00137293
		15.1	0.001471
		15.2	0.001471
		15.3	0.00156906
		15.4	0.001471
		15.5	0.0011768
		15.6	0.00127486
		15.7	0.00127486
		15.8	0.00127486
		15.9	0.00127486
		16	0.00127486
		16.1	0.0011768
		16.2	0.00107873
		16.3	0.0011768
		16.4	0.000980665
		16.5	0.00107873
		16.6	0.00107873
		16.7	0.00107873
		16.8	0.00107873
		16.9	0.00107873
		17	0.00107873
		17.1	0.00107873
		17.2	0.00107873
		17.3	0.000980665
		17.4	0.000980665
		17.5	0.00107873
		17.6	0.00107873
		17.7	0.00107873
		17.8	0.00107873
		17.9	0.00107873
		18	0.00107873
		18.1	0.000980665
		18.2	0.00107873
		18.3	0.00107873
		18.4	0.00107873
		18.5	0.00107873
		18.6	0.0011768
		18.7	0.0011768
		18.8	0.0011768
		18.9	0.00107873
		19	0.0011768
		19.1	0.0011768
		19.2	0.0011768
		19.3	0.0011768
		19.4	0.0011768
		19.5	0.0011768
		19.6	0.0011768
		19.7	0.0011768
		19.8	0.0011768
		19.9	0.0011768
		20	0.0011768
		20.1	0.0011768
		20.2	0.0011768
		20.3	0.0011768
		20.4	0.0011768
		20.5	0.00127486
		20.6	0.00127486
		20.7	0.00127486
		20.8	0.0011768
		20.9	0.0011768
		21	0.0011768
		21.1	0.0011768
		21.2	0.00127486
		21.3	0.0011768
		21.4	0.0011768
		21.5	0.0011768
		21.6	0.00127486
		21.7	0.00127486
		21.8	0.00127486
		21.9	0.00127486
		22	0.00127486
		22.1	0.00127486
		22.2	0.00127486
		22.3	0.000882599
		22.4	0.000882599
		22.5	0.000882599
		22.6	0.000882599
		22.7	0.000882599
		22.8	0.000882599
		22.9	0.000882599
		23	0.000882599
		23.1	0.000882599
		23.2	0.000882599
		23.3	0.000882599
		23.4	0.000882599
		23.5	0.000882599
		23.6	0.000882599
		23.7	0.000882599
		23.8	0.000882599
		23.9	0.000882599
		24	0.000784532
		24.1	0.000882599
		24.2	0.000882599
		24.3	0.000882599
		24.4	0.000882599
		24.5	0.000784532
		24.6	0.000784532
		24.7	0.000784532
		24.8	0.000784532
		24.9	0.000784532
		25	0.000784532
		25.1	0.000784532
		25.2	0.000882599
		25.3	0.000882599
		25.4	0.000784532
		25.5	0.000882599
		25.6	0.000784532
		25.7	0.000882599
		25.8	0.000784532
		25.9	0.000784532
		26	0.000784532
		26.1	0.000784532
		26.2	0.000784532
		26.3	0.000784532
		26.4	0.000784532
		26.5	0.000784532
		26.6	0.000784532
		26.7	0.000784532
		26.8	0.000784532
		26.9	0.000784532
		27	0.000784532
		27.1	0.000784532
		27.2	0.000784532
		27.3	0.000784532
		27.4	0.000784532
		27.5	0.000784532
		27.6	0.000784532
		27.7	0.000784532
		27.8	0.000784532
		27.9	0.000784532
		28	0.000784532
		28.1	0.000784532
		28.2	0.000784532
		28.3	0.000784532
		28.4	0.000784532
		28.5	0.000784532
		28.6	0.000784532
		28.7	0.000784532
		28.8	0.000784532
		28.9	0.000784532
		29	0.000784532
		29.1	0.000784532
		29.2	0.000784532
		29.3	0.000882599
		29.4	0.000882599
		29.5	0.000882599
		29.6	0.000882599
		29.7	0.000882599
		29.8	0.000882599
		29.9	0.000882599
		30	0.000882599
		30.1	0.000882599
		30.2	0.000882599
		30.3	0.000882599
		30.4	0.000882599
		30.5	0.000882599
		30.6	0.000882599
		30.7	0.000882599
		30.8	0.000980665
		30.9	0.000980665
		31	0.000882599
		31.1	0.000882599
		31.2	0.000882599
		31.3	0.000980665
		31.4	0.000980665
		31.5	0.000882599
		31.6	0.000882599
		31.7	0.000980665
		31.8	0.000980665
		31.9	0.000980665
		32	0.000980665
		32.1	0.000980665
		32.2	0.000980665
		32.3	0.000980665
		32.4	0.000980665
		32.5	0.000980665
		32.6	0.000980665
		32.7	0.000980665
		32.8	0.000882599
		32.9	0.000882599
		33	0.000882599
		33.1	0.000882599
		33.2	0.000882599
		33.3	0.000882599
		33.4	0.000882599
		33.5	0.000882599
		33.6	0.000882599
		33.7	0.000882599
		33.8	0.000882599
		33.9	0.000882599
		34	0.000882599
		34.1	0.000882599
		34.2	0.000882599
		34.3	0.000882599
		34.4	0.000882599
		34.5	0.000882599
		34.6	0.000882599
		34.7	0.000882599
		34.8	0.000882599
		34.9	0.000882599
		35	0.000882599
		35.1	0.000882599
		35.2	0.000882599
		35.3	0.000882599
		35.4	0.000882599
		35.5	0.000882599
		35.6	0.000980665
		35.7	0.000882599
		35.8	0.000882599
		35.9	0.000882599
		36	0.000882599
		36.1	0.000882599
		36.2	0.000882599
		36.3	0.000882599
		36.4	0.000980665
		36.5	0.000882599
		36.6	0.000980665
		36.7	0.000882599
		36.8	0.000980665
		36.9	0.000882599
		37	0.000882599
		37.1	0.000980665
		37.2	0.000980665
		37.3	0.000882599
		37.4	0.000882599
		37.5	0.000882599
		37.6	0.000882599
		37.7	0.000882599
		37.8	0.000882599
		37.9	0.000882599
		38	0.000882599
		38.1	0.000980665
		38.2	0.000980665
		38.3	0.000980665
		38.4	0.000980665
		38.5	0.000980665
		38.6	0.000980665
		38.7	0.000882599
		38.8	0.000882599
		38.9	0.000882599
		39	0.000882599
		39.1	0.000980665
		39.2	0.000882599
		39.3	0.000882599
		39.4	0.000882599
		39.5	0.000882599
		39.6	0.000882599
		39.7	0.000980665
		39.8	0.000882599
		39.9	0.000882599
		40	0.000882599
		40.1	0.000882599
		40.2	0.000980665
		40.3	0.000882599
		40.4	0.000882599
		40.5	0.000882599
		40.6	0.000882599
		40.7	0.000882599
		40.8	0.000882599
		40.9	0.000882599
		41	0.000882599
		41.1	0.000882599
		41.2	0.000882599
		41.3	0.000882599
		41.4	0.000882599
		41.5	0.000882599
		41.6	0.000882599
		41.7	0.000882599
		41.8	0.000882599
		41.9	0.000882599
		42	0.000882599
		42.1	0.000882599
		42.2	0.000882599
		42.3	0.000882599
		42.4	0.000882599
		42.5	0.000882599
		42.6	0.000882599
		42.7	0.000882599
		42.8	0.000882599
		42.9	0.000882599
		43	0.000882599
		43.1	0.000882599
		43.2	0.000882599
		43.3	0.000882599
		43.4	0.000882599
		43.5	0.000882599
		43.6	0.000882599
		43.7	0.000882599
		43.8	0.000882599
		43.9	0.000882599
		44	0.000882599
		44.1	0.000882599
		44.2	0.000882599
		44.3	0.000882599
		44.4	0.000882599
		44.5	0.000882599
		44.6	0.000882599
		44.7	0.000882599
		44.8	0.000882599
		44.9	0.000882599
		45	0.000882599
		45.1	0.000882599
		45.2	0.000882599
		45.3	0.000882599
		45.4	0.000882599
		45.5	0.000882599
		45.6	0.000980665
		45.7	0.000882599
		45.8	0.000980665
		45.9	0.000980665
		46	0.000980665
		46.1	0.000980665
		46.2	0.000980665
		46.3	0.000980665
		46.4	0.000882599
		46.5	0.000882599
		46.6	0.000980665
		46.7	0.000980665
		46.8	0.000980665
		46.9	0.000980665
		47	0.000980665
		47.1	0.000980665
		47.2	0.000980665
		47.3	0.000980665
		47.4	0.000882599
		47.5	0.000882599
		47.6	0.000882599
		47.7	0.000980665
		47.8	0.000980665
		47.9	0.000980665
		48	0.000980665
		48.1	0.000980665
		48.2	0.000980665
		48.3	0.000980665
		48.4	0.000980665
		48.5	0.000980665
		48.6	0.000980665
		48.7	0.000980665
		48.8	0.000980665
		48.9	0.000980665
		49	0.000980665
		49.1	0.000980665
		49.2	0.000980665
		49.3	0.000980665
		49.4	0.000980665
		49.5	0.000980665
		49.6	0.000980665
		49.7	0.000980665
		49.8	0.000980665
		49.9	0.000980665
		50	0.00107873
		50.1	0.00107873
		50.2	0.00107873
		50.3	0.00107873
		50.4	0.00107873
		50.5	0.00107873
		50.6	0.00107873
		50.7	0.00107873
		50.8	0.00107873
		50.9	0.00107873
		51	0.00107873
		51.1	0.00107873
		51.2	0.00107873
		51.3	0.0011768
		51.4	0.0011768
		51.5	0.0011768
		51.6	0.0011768
		51.7	0.0011768
		51.8	0.0011768
		51.9	0.0011768
		52	0.0011768
		52.1	0.00107873
		52.2	0.00107873
		52.3	0.00107873
		52.4	0.00107873
		52.5	0.00107873
		52.6	0.0011768
		52.7	0.0011768
		52.8	0.0011768
		52.9	0.0011768
		53	0.0011768
		53.1	0.0011768
		53.2	0.0011768
		53.3	0.0011768
		53.4	0.0011768
		53.5	0.0011768
		53.6	0.0011768
		53.7	0.0011768
		53.8	0.0011768
		53.9	0.0011768
		54	0.00127486
		54.1	0.00127486
		54.2	0.00127486
		54.3	0.00127486
		54.4	0.00127486
		54.5	0.00127486
		54.6	0.00127486
		54.7	0.00127486
		54.8	0.00127486
		54.9	0.00127486
		55	0.00127486
		55.1	0.00127486
		55.2	0.00127486
		55.3	0.00137293
		55.4	0.00137293
		55.5	0.00137293
		55.6	0.00137293
		55.7	0.00137293
		55.8	0.00137293
		55.9	0.001471
		56	0.001471
		56.1	0.001471
		56.2	0.00156906
		56.3	0.00156906
		56.4	0.00156906
		56.5	0.00166713
		56.6	0.00166713
		56.7	0.00166713
		56.8	0.0017652
		56.9	0.0017652
		57	0.00186326
		57.1	0.00186326
		57.2	0.00186326
		57.3	0.00196133
		57.4	0.00196133
		57.5	0.0020594
		57.6	0.0020594
		57.7	0.00215746
		57.8	0.00215746
		57.9	0.00196133
		58	0.0020594
		58.1	0.0020594
		58.2	0.00215746
		58.3	0.00215746
		58.4	0.00225553
		58.5	0.00225553
		58.6	0.00225553
		58.7	0.0023536
		58.8	0.0023536
		58.9	0.0023536
		59	0.00245166
		59.1	0.00245166
		59.2	0.00254973
		59.3	0.00254973
		59.4	0.0026478
		59.5	0.0026478
		59.6	0.00274586
		59.7	0.00274586
		59.8	0.00284393
		59.9	0.00284393
		60	0.00294199
		60.1	0.00294199
		60.2	0.00304006
		60.3	0.00304006
		60.4	0.00313813
		60.5	0.00313813
		60.6	0.00313813
		60.7	0.00323619
		60.8	0.00323619
		60.9	0.00323619
		61	0.00333426
		61.1	0.00333426
		61.2	0.00333426
		61.3	0.00313813
		61.4	0.00274586
		61.5	0.00284393
		61.6	0.00284393
		61.7	0.00284393
		61.8	0.00294199
		61.9	0.00294199
		62	0.00304006
		62.1	0.00304006
		62.2	0.00304006
		62.3	0.00304006
		62.4	0.00304006
		62.5	0.00304006
		62.6	0.00254973
		62.7	0.0026478
		62.8	0.0026478
		62.9	0.0026478
		63	0.00274586
		63.1	0.00274586
		63.2	0.00284393
		63.3	0.00284393
		63.4	0.00284393
		63.5	0.00294199
		63.6	0.00294199
		63.7	0.00294199
		63.8	0.00304006
		63.9	0.00304006
		64	0.00313813
		64.1	0.00313813
		64.2	0.00313813
		64.3	0.00323619
		64.4	0.00323619
		64.5	0.00323619
		64.6	0.00333426
		64.7	0.00333426
		64.8	0.00343233
		64.9	0.00343233
		65	0.00353039
		65.1	0.00353039
		65.2	0.00362846
		65.3	0.00372653
		65.4	0.00372653
		65.5	0.00372653
		65.6	0.00382459
		65.7	0.00392266
		65.8	0.00392266
		65.9	0.00402073
		66	0.00402073
		66.1	0.00411879
		66.2	0.00421686
		66.3	0.00421686
		66.4	0.00431493
		66.5	0.00441299
		66.6	0.00451106
		66.7	0.00460913
		66.8	0.00470719
		66.9	0.00480526
		67	0.00500139
		67.1	0.00519752
		67.2	0.00549172
		67.3	0.00578592
		67.4	0.00608012
		67.5	0.00647239
		67.6	0.00676659
		67.7	0.00715885
		67.8	0.00755112
		67.9	0.00794339
		68	0.00853179
		68.1	0.00902212
		68.2	0.00961052
		68.3	0.010297
		68.4	0.0109834
		68.5	0.0116699
		68.6	0.0123564
		68.7	0.0130428
		68.8	0.0137293
		68.9	0.0144158
		69	0.0151022
		69.1	0.0157887
		69.2	0.0164752
		69.3	0.0171616
		69.4	0.0178481
		69.5	0.0184365
		69.6	0.0190249
		69.7	0.0196133
		69.8	0.0202017
		69.9	0.0208882
		70	0.0215746
		70.1	0.0222611
		70.2	0.0229476
		70.3	0.023634
		70.4	0.0242224
		70.5	0.0247128
		70.6	0.0252031
		70.7	0.0256934
		70.8	0.0261838
		70.9	0.026478
		71	0.0268702
		71.1	0.0272625
		71.2	0.0275567
		71.3	0.0278509
		71.4	0.0281451
		71.5	0.0285374
		71.6	0.0290277
		71.7	0.02942
		71.8	0.0298122
		71.9	0.0302045
		72	0.0305967
		72.1	0.030989
		72.2	0.0312832
		72.3	0.0316755
		72.4	0.0319697
		72.5	0.0321658
		72.6	0.03246
		72.7	0.0326561
		72.8	0.0328523
		72.9	0.0330484
		73	0.0330484
		73.1	0.0331465
		73.2	0.0329503
		73.3	0.0323619
		73.4	0.0301064
		73.5	0.0303025
		73.6	0.0304987
		73.7	0.0305967
		73.8	0.0306948
		73.9	0.0307929
		74	0.0308909
		74.1	0.030989
		74.2	0.030989
		74.3	0.030989
		74.4	0.030989
		74.5	0.0310871
		74.6	0.0310871
		74.7	0.0310871
		74.8	0.0312832
		74.9	0.0313813
		75	0.0314793
		75.1	0.0315774
		75.2	0.0316755
		75.3	0.0318716
		75.4	0.0320677
		75.5	0.0323619
		75.6	0.0325581
		75.7	0.0329503
		75.8	0.0332445
		75.9	0.0338329
		76	0.0344213
		76.1	0.0351078
		76.2	0.0359904
		76.3	0.036873
		76.4	0.0378537
		76.5	0.0388343
		76.6	0.0399131
		76.7	0.0409918
		76.8	0.0421686
		76.9	0.0433454
		77	0.0446203
		77.1	0.0459932
		77.2	0.0474642
		77.3	0.0489352
		77.4	0.0504062
		77.5	0.0519752
		77.6	0.0536424
		77.7	0.0553095
		77.8	0.0571728
		77.9	0.059036
		78	0.0611935
		78.1	0.0636452
		78.2	0.0664891
		78.3	0.0700195
		78.4	0.0743344
		78.5	0.0798261
		78.593	0.0860043
		78.675	0.0920844
		78.748	0.0982626
		78.817	0.104441
		78.882	0.110521
		78.943	0.116699
		79.001	0.122779
		79.055	0.128957
		79.107	0.135038
		79.157	0.141216
		79.205	0.147296
		79.252	0.153474
		79.298	0.159554
		79.344	0.165732
		79.39	0.171911
		79.436	0.178089
		79.481	0.184267
		79.526	0.190347
		79.571	0.196525
		79.616	0.202703
		79.661	0.208882
		79.706	0.21506
		79.751	0.221238
		79.797	0.227416
		79.843	0.233594
		79.89	0.239773
		79.936	0.245853
		79.983	0.252031
		80.03	0.258209
		80.078	0.264289
		80.126	0.270467
		80.175	0.276646
		80.224	0.282726
		80.274	0.288904
		80.325	0.295082
		80.377	0.30126
		80.43	0.30734
		80.484	0.313519
		80.539	0.319697
		80.594	0.325875
		80.649	0.331955
		80.705	0.338133
		80.76	0.344311
		80.815	0.35049
		80.869	0.356668
		80.924	0.362846
		80.981	0.368926
		81.04	0.375104
		81.101	0.381184
		81.166	0.387363
		81.233	0.393541
		81.304	0.399621
		81.383	0.405701
		81.473	0.411879
		81.573	0.417763
		81.673	0.42247
		81.773	0.424922
		81.873	0.428256
		81.973	0.431885
		82.073	0.435709
		82.173	0.439632
		82.273	0.443555
		82.373	0.447379
		82.473	0.451302
		82.573	0.455323
		82.673	0.458951
		82.773	0.461991
		82.873	0.46258
		82.973	0.45748
		83.073	0.459245
		83.173	0.461991
		83.257	0.468169
		83.328	0.474348
		83.394	0.480526
		83.459	0.486704
		83.524	0.492882
		83.59	0.49906
		83.69	0.504356
		83.735	0.510534
		83.774	0.51681
		83.81	0.522989
		83.843	0.529265
		83.881	0.535443
		83.914	0.541621
		83.941	0.547799
		83.965	0.554174
		83.986	0.560352
		84.006	0.566726
		84.025	0.572806
		84.044	0.578985
		84.063	0.585261
		84.081	0.591439
		84.099	0.597911
		84.116	0.604188
		84.133	0.610562
		84.15	0.616936
		84.166	0.623115
		84.182	0.629391
		84.198	0.635765
		84.214	0.642238
		84.23	0.64871
		84.246	0.655084
		84.261	0.661262
		84.276	0.667735
		84.29	0.673913
		84.304	0.680287
		84.318	0.68676
		84.332	0.69333
		84.345	0.699508
		84.358	0.705883
		84.371	0.712355
		84.383	0.718533
		84.395	0.724711
		84.407	0.73089
		84.419	0.737166
		84.431	0.74354
		84.443	0.750013
		84.455	0.756681
		84.466	0.762859
		84.477	0.769136
		84.488	0.77551
		84.499	0.781884
		84.51	0.788455
		84.521	0.795221
		84.531	0.801399
		84.541	0.807774
		84.551	0.814246
		84.561	0.820915
		84.571	0.827681
		84.58	0.833859
		84.589	0.840234
		84.598	0.846706
		84.607	0.853277
		84.616	0.860043
		84.625	0.866908
		84.633	0.872988
		84.641	0.879166
		84.649	0.885442
		84.657	0.891817
		84.665	0.898191
		84.673	0.904565
		84.681	0.911038
		84.689	0.917608
		84.697	0.924179
		84.705	0.930749
		84.713	0.937418
		84.721	0.944086
		84.729	0.950853
		84.737	0.957619
		84.745	0.964386
		84.753	0.971251
		84.761	0.978115
		84.769	0.985078
		84.777	0.991943
		84.784	0.998121
		84.791	1.0043
		84.798	1.01048
		84.805	1.01675
		84.812	1.02313
		84.819	1.0295
		84.826	1.03588
		84.833	1.04225
		84.84	1.04863
		84.847	1.0551
		84.854	1.06147
		84.861	1.06794
		84.868	1.07451
		84.875	1.08099
		84.882	1.08766
		84.889	1.09432
		84.896	1.10109
		84.903	1.10796
		84.91	1.11482
		84.917	1.12178
		84.924	1.12884
		84.931	1.136
		84.937	1.14208
		84.943	1.14826
		84.949	1.15454
		84.955	1.16081
		84.961	1.16719
		84.967	1.17366
		84.973	1.18013
		84.979	1.1867
		84.985	1.19337
		84.991	1.20004
		84.997	1.20681
		85.003	1.21367
		85.009	1.22054
		85.015	1.2275
		85.021	1.23446
		85.027	1.24152
		85.033	1.24868
		85.039	1.25594
		85.045	1.26319
		85.05	1.26927
		85.055	1.27545
		85.06	1.28173
		85.065	1.28801
		85.07	1.29428
		85.075	1.30066
		85.08	1.30713
		85.085	1.3135
		85.09	1.32007
		85.095	1.32664
		85.1	1.33321
		85.105	1.33978
		85.11	1.34655
		85.115	1.35322
		85.12	1.35999
		85.125	1.36685
		85.13	1.37372
		85.135	1.38068
		85.14	1.38754
		85.145	1.3946
		85.15	1.40157
		85.155	1.40873
		85.16	1.41579
		85.165	1.42294
		85.17	1.4302
		85.175	1.43736
		85.18	1.44462
		85.185	1.45187
		85.19	1.45913
		85.195	1.46649
		85.2	1.47374
		85.205	1.4811
		85.21	1.48845
		85.215	1.49591
		85.22	1.50326
		85.225	1.51081
		85.23	1.51827
		85.235	1.52582
		85.24	1.53337
		85.245	1.54092
		85.25	1.54857
		85.254	1.55465
		85.258	1.56083
		85.262	1.56691
		85.266	1.57308
		85.27	1.57926
		85.274	1.58544
		85.278	1.59162
		85.282	1.5978
		85.286	1.60398
		85.29	1.61025
		85.294	1.61643
		85.298	1.62271
		85.302	1.62898
		85.306	1.63526
		85.31	1.64144
		85.314	1.64771
		85.318	1.65409
		85.322	1.66036
		85.326	1.66664
		85.33	1.67301
		85.334	1.67939
		85.338	1.68567
		85.342	1.69204
		85.346	1.69841
		85.35	1.70469
		85.354	1.71106
		85.358	1.71744
		85.362	1.72381
		85.366	1.73019
		85.37	1.73656
		85.374	1.74294
		85.378	1.74931
		85.382	1.75568
		85.386	1.76206
		85.39	1.76834
		85.394	1.77471
		85.398	1.78108
		85.402	1.78746
		85.406	1.79383
		85.41	1.80011
		85.414	1.80648
		85.418	1.81286
		85.422	1.81923
		85.426	1.82561
		85.43	1.83198
		85.434	1.83835
		85.438	1.84473
		85.442	1.8512
		85.446	1.85758
		85.45	1.86395
		85.454	1.87032
		85.458	1.8767
		85.462	1.88307
		85.466	1.88945
		85.47	1.89582
		85.474	1.9022
		85.478	1.90857
		85.482	1.91494
		85.486	1.92122
		85.49	1.9276
		85.494	1.93397
		85.498	1.94034
		85.502	1.94672
		85.506	1.95309
		85.51	1.95947
		85.514	1.96584
		85.518	1.97222
		85.522	1.97869
		85.526	1.98506
		85.53	1.99144
		85.534	1.99781
		85.538	2.00428
		85.542	2.01066
		85.546	2.01703
		85.55	2.02331
		85.554	2.02968
		85.558	2.03596
		85.562	2.04214
		85.566	2.04841
		85.57	2.05469
		85.574	2.06097
		85.578	2.06714
		85.582	2.07332
		85.586	2.0795
		85.59	2.08568
		85.594	2.09186
		85.598	2.09794
		85.602	2.10411
		85.606	2.11029
		85.61	2.11637
		85.614	2.12255
		85.618	2.12863
		85.623	2.13618
		85.628	2.14383
		85.633	2.15138
		85.638	2.15903
		85.643	2.16658
		85.648	2.17413
		85.653	2.18169
		85.658	2.18914
		85.663	2.19669
		85.668	2.20414
		85.673	2.2116
		85.678	2.21905
		85.683	2.2265
		85.688	2.23395
		85.693	2.24131
		85.698	2.24866
		85.703	2.25612
		85.708	2.26347
		85.713	2.27083
		85.718	2.27808
		85.723	2.28544
		85.728	2.2927
		85.733	2.29995
		85.738	2.30711
		85.743	2.31437
		85.748	2.32153
		85.753	2.32859
		85.758	2.33575
		85.763	2.34281
		85.768	2.34977
		85.773	2.35683
		85.778	2.36379
		85.783	2.37076
		85.788	2.37772
		85.793	2.38459
		85.798	2.39145
		85.803	2.39831
		85.808	2.40528
		85.813	2.41214
		85.818	2.41901
