# Supplementary material for: A Framework for Soft Mechanism Driven Robots
Source: Research Square preprint supplement (doi:10.21203/rs.3.rs-4109720/v1), 2024-03-28
Supplement: Supplementary file 5 [file Stress_versus_Time_alldata.xlsx]

## Sheet: Sheet1
Rigid		Flexible
Time	Stress	Time	Stress
(s)	(MPa)	(s)	(MPa)
0	0	0	0
0.1	0	0.1	0
0.2	0	0.2	0
0.3	0	0.3	0
0.4	0	0.4	0
0.5	0	0.5	0
0.6	0	0.6	0
0.7	0	0.7	0
0.8	0	0.8	0
0.9	0	0.9	0
1	9.80665e-05	1	0
1.1	9.80665e-05	1.1	0
1.2	9.80665e-05	1.2	0
1.3	9.80665e-05	1.3	0
1.4	9.80665e-05	1.4	0
1.5	9.80665e-05	1.5	9.80665e-05
1.6	0.000196133	1.6	9.80665e-05
1.7	0.000196133	1.7	9.80665e-05
1.8	0.000196133	1.8	9.80665e-05
1.9	0.000196133	1.9	0.000196133
2	0.0002942	2	0.000196133
2.1	0.0002942	2.1	0.000294199
2.2	0.0002942	2.2	0.000294199
2.3	0.0002942	2.3	0.000392266
2.4	0.0002942	2.4	0.000392266
2.5	0.000392266	2.5	0.000490332
2.6	0.000490333	2.6	0.000490332
2.7	0.000588399	2.7	0.000588399
2.8	0.000490333	2.8	0.000588399
2.9	0.000588399	2.9	0.000686465
3	0.000686466	3	0.000686465
3.1	0.000882599	3.1	0.000784532
3.2	0.00107873	3.2	0.000784532
3.3	0.00127487	3.3	0.000882599
3.4	0.001471	3.4	0.000980665
3.5	0.00166713	3.5	0.00107873
3.6	0.00196133	3.6	0.00107873
3.7	0.00215746	3.7	0.0011768
3.8	0.0023536	3.8	0.00127486
3.9	0.0026478	3.9	0.00137293
4	0.002942	4	0.00137293
4.1	0.00323619	4.1	0.001471
4.2	0.00333426	4.2	0.00156906
4.3	0.00362846	4.3	0.00166713
4.4	0.00392266	4.4	0.0017652
4.5	0.00411879	4.5	0.0017652
4.6	0.00431493	4.6	0.00186326
4.7	0.00451106	4.7	0.00196133
4.8	0.00480526	4.8	0.0020594
4.9	0.00500139	4.9	0.0020594
5	0.00519752	5	0.00215746
5.1	0.00539366	5.1	0.00225553
5.2	0.00558979	5.2	0.0023536
5.3	0.00578592	5.3	0.00245166
5.4	0.00598206	5.4	0.00254973
5.5	0.00627626	5.5	0.00254973
5.6	0.00627626	5.6	0.0026478
5.7	0.00647239	5.7	0.00274586
5.8	0.00657046	5.8	0.00284393
5.9	0.00676659	5.9	0.00294199
6	0.00696272	6	0.00304006
6.1	0.00696272	6.1	0.00304006
6.2	0.00696272	6.2	0.00313813
6.3	0.00706079	6.3	0.00323619
6.4	0.00715886	6.4	0.00333426
6.5	0.00725692	6.5	0.00343233
6.6	0.00745305	6.6	0.00343233
6.7	0.00764919	6.7	0.00353039
6.8	0.00774725	6.8	0.00362846
6.9	0.00784532	6.9	0.00372653
7	0.00794339	7	0.00372653
7.1	0.00804145	7.1	0.00382459
7.2	0.00794339	7.2	0.00392266
7.3	0.00794339	7.3	0.00402073
7.4	0.00823759	7.4	0.00411879
7.5	0.00794339	7.5	0.00411879
7.6	0.00813952	7.6	0.00421686
7.7	0.00804145	7.7	0.00421686
7.8	0.00804145	7.8	0.00431493
7.9	0.00813952	7.9	0.00441299
8	0.00804145	8	0.00451106
8.1	0.00804145	8.1	0.00451106
8.2	0.00804145	8.2	0.00451106
8.3	0.00804145	8.3	0.00451106
8.4	0.00784532	8.4	0.00451106
8.5	0.00794339	8.5	0.00460913
8.6	0.00794339	8.6	0.00460913
8.7	0.00784532	8.7	0.00460913
8.8	0.00784532	8.8	0.00470719
8.9	0.00784532	8.9	0.00470719
9	0.00794339	9	0.00470719
9.1	0.00794339	9.1	0.00470719
9.2	0.00794339	9.2	0.00480526
9.3	0.00794339	9.3	0.00480526
9.4	0.00804145	9.4	0.00480526
9.5	0.00794339	9.5	0.00490333
9.6	0.00804145	9.6	0.00490333
9.7	0.00833565	9.7	0.00490333
9.8	0.00823759	9.8	0.00490333
9.9	0.00764919	9.9	0.00490333
10	0.00764919	10	0.00480526
10.1	0.00764919	10.1	0.00480526
10.2	0.00755112	10.2	0.00480526
10.3	0.00755112	10.3	0.00470719
10.4	0.00764919	10.4	0.00460913
10.5	0.00745305	10.5	0.00431493
10.6	0.00745305	10.6	0.00431493
10.7	0.00755112	10.7	0.00441299
10.8	0.00745305	10.8	0.00441299
10.9	0.00764919	10.9	0.00451106
11	0.00764919	11	0.00451106
11.1	0.00764919	11.1	0.00460913
11.2	0.00755112	11.2	0.00460913
11.3	0.00764919	11.3	0.00460913
11.4	0.00784532	11.4	0.00470719
11.5	0.00784532	11.5	0.00480526
11.6	0.00794339	11.6	0.00480526
11.7	0.00794339	11.7	0.00490333
11.8	0.00784532	11.8	0.00490333
11.9	0.00784532	11.9	0.00490333
12	0.00774725	12	0.00500139
12.1	0.00745305	12.1	0.00509946
12.2	0.00735499	12.2	0.00509946
12.3	0.00715886	12.3	0.00509946
12.4	0.00696272	12.4	0.00509946
12.5	0.00666852	12.5	0.00519752
12.6	0.00637432	12.6	0.00519752
12.7	0.00598206	12.7	0.00519752
12.8	0.00578592	12.8	0.00519752
12.9	0.00549172	12.9	0.00529559
13	0.00539366	13	0.00529559
13.1	0.00529559	13.1	0.00529559
13.2	0.00519752	13.2	0.00529559
13.3	0.00509946	13.3	0.00529559
13.4	0.00509946	13.4	0.00529559
13.5	0.00500139	13.5	0.00529559
13.6	0.00500139	13.6	0.00529559
13.7	0.00500139	13.7	0.00529559
13.8	0.00490333	13.8	0.00529559
13.9	0.00490333	13.9	0.00529559
14	0.00490333	14	0.00529559
14.1	0.00480526	14.1	0.00529559
14.2	0.00470719	14.2	0.00372653
14.3	0.00470719	14.3	0.00323619
14.4	0.00470719	14.4	0.00333426
14.5	0.00470719	14.5	0.00343233
14.6	0.00460913	14.6	0.00343233
14.7	0.00460913	14.7	0.00333426
14.8	0.00451106	14.8	0.00304006
14.9	0.00441299	14.9	0.00127486
15	0.00441299	15	0.00137293
15.1	0.00441299	15.1	0.001471
15.2	0.00441299	15.2	0.001471
15.3	0.00431493	15.3	0.00156906
15.4	0.00431493	15.4	0.001471
15.5	0.00421686	15.5	0.0011768
15.6	0.00421686	15.6	0.00127486
15.7	0.00421686	15.7	0.00127486
15.8	0.00382459	15.8	0.00127486
15.9	0.00382459	15.9	0.00127486
16	0.00382459	16	0.00127486
16.1	0.00382459	16.1	0.0011768
16.2	0.00382459	16.2	0.00107873
16.3	0.00372653	16.3	0.0011768
16.4	0.00372653	16.4	0.000980665
16.5	0.00372653	16.5	0.00107873
16.6	0.00372653	16.6	0.00107873
16.7	0.00372653	16.7	0.00107873
16.8	0.00372653	16.8	0.00107873
16.9	0.00372653	16.9	0.00107873
17	0.00372653	17	0.00107873
17.1	0.00372653	17.1	0.00107873
17.2	0.00372653	17.2	0.00107873
17.3	0.00372653	17.3	0.000980665
17.4	0.00362846	17.4	0.000980665
17.5	0.00362846	17.5	0.00107873
17.6	0.00382459	17.6	0.00107873
17.7	0.00382459	17.7	0.00107873
17.8	0.00382459	17.8	0.00107873
17.9	0.00382459	17.9	0.00107873
18	0.00382459	18	0.00107873
18.1	0.00372653	18.1	0.000980665
18.2	0.00372653	18.2	0.00107873
18.3	0.00372653	18.3	0.00107873
18.4	0.00372653	18.4	0.00107873
18.5	0.00372653	18.5	0.00107873
18.6	0.00392266	18.6	0.0011768
18.7	0.00392266	18.7	0.0011768
18.8	0.00392266	18.8	0.0011768
18.9	0.00402073	18.9	0.00107873
19	0.00402073	19	0.0011768
19.1	0.00402073	19.1	0.0011768
19.2	0.00431493	19.2	0.0011768
19.3	0.00451106	19.3	0.0011768
19.4	0.00480526	19.4	0.0011768
19.5	0.00539366	19.5	0.0011768
19.6	0.00608012	19.6	0.0011768
19.7	0.00696272	19.7	0.0011768
19.8	0.00764919	19.8	0.0011768
19.9	0.00833565	19.9	0.0011768
20	0.00892405	20	0.0011768
20.1	0.00961052	20.1	0.0011768
20.2	0.0107873	20.2	0.0011768
20.3	0.011866	20.3	0.0011768
20.4	0.0127486	20.4	0.0011768
20.5	0.0129448	20.5	0.00127486
20.6	0.0128467	20.6	0.00127486
20.7	0.0125525	20.7	0.00127486
20.8	0.0125525	20.8	0.0011768
20.9	0.0130428	20.9	0.0011768
21	0.0140235	21	0.0011768
21.1	0.0150042	21.1	0.0011768
21.2	0.0159848	21.2	0.00127486
21.3	0.0168674	21.3	0.0011768
21.4	0.01775	21.4	0.0011768
21.5	0.0187307	21.5	0.0011768
21.6	0.0196133	21.6	0.00127486
21.7	0.0203978	21.7	0.00127486
21.8	0.020594	21.8	0.00127486
21.9	0.0213785	21.9	0.00127486
22	0.0222611	22	0.00127486
22.1	0.0230456	22.1	0.00127486
22.2	0.0237321	22.2	0.00127486
22.3	0.0243205	22.3	0.000882599
22.4	0.025007	22.4	0.000882599
22.5	0.0257915	22.5	0.000882599
22.6	0.0268702	22.6	0.000882599
22.7	0.0281451	22.7	0.000882599
22.8	0.0292238	22.8	0.000882599
22.9	0.0304987	22.9	0.000882599
23	0.0314793	23	0.000882599
23.1	0.0325581	23.1	0.000882599
23.2	0.0334407	23.2	0.000882599
23.3	0.0342252	23.3	0.000882599
23.4	0.0348136	23.4	0.000882599
23.5	0.0355001	23.5	0.000882599
23.6	0.0363827	23.6	0.000882599
23.7	0.0369711	23.7	0.000882599
23.8	0.0376575	23.8	0.000882599
23.9	0.0382459	23.9	0.000882599
24	0.0387363	24	0.000784532
24.1	0.0392266	24.1	0.000882599
24.2	0.039815	24.2	0.000882599
24.3	0.0405995	24.3	0.000882599
24.4	0.0424628	24.4	0.000882599
24.5	0.0444241	24.5	0.000784532
24.6	0.0464835	24.6	0.000784532
24.7	0.0483468	24.7	0.000784532
24.8	0.0504062	24.8	0.000784532
24.9	0.0521714	24.9	0.000784532
25	0.0536424	25	0.000784532
25.1	0.0549172	25.1	0.000784532
25.2	0.055996	25.2	0.000882599
25.3	0.0570747	25.3	0.000882599
25.4	0.0580554	25.4	0.000784532
25.5	0.059036	25.5	0.000882599
25.6	0.0599186	25.6	0.000784532
25.7	0.0608993	25.7	0.000882599
25.8	0.061978	25.8	0.000784532
25.9	0.0629587	25.9	0.000784532
26	0.0639394	26	0.000784532
26.1	0.0654104	26.1	0.000784532
26.2	0.0671756	26.2	0.000784532
26.3	0.0690388	26.3	0.000784532
26.4	0.0703137	26.4	0.000784532
26.5	0.0723731	26.5	0.000784532
26.6	0.0743344	26.6	0.000784532
26.7	0.0760996	26.7	0.000784532
26.8	0.0775706	26.8	0.000784532
26.9	0.0791397	26.9	0.000784532
27	0.0807087	27	0.000784532
27.1	0.0821797	27.1	0.000784532
27.2	0.0834546	27.2	0.000784532
27.3	0.0845333	27.3	0.000784532
27.4	0.0857101	27.4	0.000784532
27.5	0.0868869	27.5	0.000784532
27.6	0.0877695	27.6	0.000784532
27.7	0.0886521	27.7	0.000784532
27.8	0.0896328	27.8	0.000784532
27.9	0.0905154	27.9	0.000784532
28	0.0912018	28	0.000784532
28.1	0.0917902	28.1	0.000784532
28.2	0.0920844	28.2	0.000784532
28.3	0.0921825	28.3	0.000784532
28.4	0.0925748	28.4	0.000784532
28.5	0.0938496	28.5	0.000784532
28.6	0.0950264	28.6	0.000784532
28.7	0.0962032	28.7	0.000784532
28.8	0.0971839	28.8	0.000784532
28.9	0.0980665	28.9	0.000784532
29	0.098851	29	0.000784532
29.1	0.0995375	29.1	0.000784532
29.2	0.100224	29.2	0.000784532
29.3	0.10091	29.3	0.000882599
29.4	0.101793	29.4	0.000882599
29.5	0.102283	29.5	0.000882599
29.6	0.102578	29.6	0.000882599
29.7	0.102578	29.7	0.000882599
29.8	0.102381	29.8	0.000882599
29.9	0.102185	29.9	0.000882599
30	0.101989	30	0.000882599
30.1	0.101793	30.1	0.000882599
30.2	0.101695	30.2	0.000882599
30.3	0.101499	30.3	0.000882599
30.4	0.101303	30.4	0.000882599
30.5	0.100812	30.5	0.000882599
30.6	0.100126	30.6	0.000882599
30.7	0.0994394	30.7	0.000882599
30.8	0.098851	30.8	0.000980665
30.9	0.0983607	30.9	0.000980665
31	0.0978704	31	0.000882599
31.1	0.0971839	31.1	0.000882599
31.2	0.0965955	31.2	0.000882599
31.3	0.0961052	31.3	0.000980665
31.4	0.0956148	31.4	0.000980665
31.5	0.0946342	31.5	0.000882599
31.6	0.0935554	31.6	0.000882599
31.7	0.0922806	31.7	0.000980665
31.8	0.0912999	31.8	0.000980665
31.9	0.0904173	31.9	0.000980665
32	0.0895347	32	0.000980665
32.1	0.0886521	32.1	0.000980665
32.2	0.0876715	32.2	0.000980665
32.3	0.0866908	32.3	0.000980665
32.4	0.0856121	32.4	0.000980665
32.5	0.0846314	32.5	0.000980665
32.6	0.0834546	32.6	0.000980665
32.7	0.0827681	32.7	0.000980665
32.8	0.0820817	32.8	0.000882599
32.9	0.0811991	32.9	0.000882599
33	0.0803165	33	0.000882599
33.1	0.0793358	33.1	0.000882599
33.2	0.0785513	33.2	0.000882599
33.3	0.0773745	33.3	0.000882599
33.4	0.0762957	33.4	0.000882599
33.5	0.0744325	33.5	0.000882599
33.6	0.0729615	33.6	0.000882599
33.7	0.0721769	33.7	0.000882599
33.8	0.0714905	33.8	0.000882599
33.9	0.0710001	33.9	0.000882599
34	0.0703137	34	0.000882599
34.1	0.0694311	34.1	0.000882599
34.2	0.0689407	34.2	0.000882599
34.3	0.0687446	34.3	0.000882599
34.4	0.0684504	34.4	0.000882599
34.5	0.067862	34.5	0.000882599
34.6	0.0669794	34.6	0.000882599
34.7	0.066391	34.7	0.000882599
34.8	0.0659988	34.8	0.000882599
34.9	0.0655084	34.9	0.000882599
35	0.064822	35	0.000882599
35.1	0.0641355	35.1	0.000882599
35.2	0.0635471	35.2	0.000882599
35.3	0.0629587	35.3	0.000882599
35.4	0.0624684	35.4	0.000882599
35.5	0.061978	35.5	0.000882599
35.6	0.0613896	35.6	0.000980665
35.7	0.0608993	35.7	0.000882599
35.8	0.060507	35.8	0.000882599
35.9	0.0600167	35.9	0.000882599
36	0.0595264	36	0.000882599
36.1	0.0592322	36.1	0.000882599
36.2	0.0588399	36.2	0.000882599
36.3	0.0582515	36.3	0.000882599
36.4	0.057467	36.4	0.000980665
36.5	0.0566824	36.5	0.000882599
36.6	0.0557998	36.6	0.000980665
36.7	0.0550153	36.7	0.000882599
36.8	0.0543288	36.8	0.000980665
36.9	0.0534462	36.9	0.000882599
37	0.0529559	37	0.000882599
37.1	0.0522694	37.1	0.000980665
37.2	0.0478565	37.2	0.000980665
37.3	0.0469739	37.3	0.000882599
37.4	0.0464835	37.4	0.000882599
37.5	0.0460913	37.5	0.000882599
37.6	0.0458951	37.6	0.000882599
37.7	0.045699	37.7	0.000882599
37.8	0.0454048	37.8	0.000882599
37.9	0.0450125	37.9	0.000882599
38	0.0445222	38	0.000882599
38.1	0.0441299	38.1	0.000980665
38.2	0.0437377	38.2	0.000980665
38.3	0.0433454	38.3	0.000980665
38.4	0.0429531	38.4	0.000980665
38.5	0.0426589	38.5	0.000980665
38.6	0.0422667	38.6	0.000980665
38.7	0.0417763	38.7	0.000882599
38.8	0.0413841	38.8	0.000882599
38.9	0.0408937	38.9	0.000882599
39	0.0404034	39	0.000882599
39.1	0.039815	39.1	0.000980665
39.2	0.0393247	39.2	0.000882599
39.3	0.038344	39.3	0.000882599
39.4	0.0375595	39.4	0.000882599
39.5	0.0370691	39.5	0.000882599
39.6	0.036873	39.6	0.000882599
39.7	0.0363827	39.7	0.000980665
39.8	0.0359904	39.8	0.000882599
39.9	0.0355001	39.9	0.000882599
40	0.0352059	40	0.000882599
40.1	0.0350097	40.1	0.000882599
40.2	0.0347155	40.2	0.000980665
40.3	0.0344213	40.3	0.000882599
40.4	0.0342252	40.4	0.000882599
40.5	0.0340291	40.5	0.000882599
40.6	0.0337349	40.6	0.000882599
40.7	0.0334407	40.7	0.000882599
40.8	0.0330484	40.8	0.000882599
40.9	0.0327542	40.9	0.000882599
41	0.0325581	41	0.000882599
41.1	0.0322639	41.1	0.000882599
41.2	0.0320677	41.2	0.000882599
41.3	0.0316755	41.3	0.000882599
41.4	0.0312832	41.4	0.000882599
41.5	0.0307929	41.5	0.000882599
41.6	0.0304006	41.6	0.000882599
41.7	0.0302045	41.7	0.000882599
41.8	0.0300083	41.8	0.000882599
41.9	0.0298122	41.9	0.000882599
42	0.0296161	42	0.000882599
42.1	0.0293219	42.1	0.000882599
42.2	0.0291258	42.2	0.000882599
42.3	0.0289296	42.3	0.000882599
42.4	0.0287335	42.4	0.000882599
42.5	0.0285374	42.5	0.000882599
42.6	0.028047	42.6	0.000882599
42.7	0.0275567	42.7	0.000882599
42.8	0.0256934	42.8	0.000882599
42.9	0.0222611	42.9	0.000882599
43	0.0203978	43	0.000882599
43.1	0.0197114	43.1	0.000882599
43.2	0.0193191	43.2	0.000882599
43.3	0.019123	43.3	0.000882599
43.4	0.0189268	43.4	0.000882599
43.5	0.0188288	43.5	0.000882599
43.6	0.0186326	43.6	0.000882599
43.7	0.0184365	43.7	0.000882599
43.8	0.0181423	43.8	0.000882599
43.9	0.0180442	43.9	0.000882599
44	0.0179462	44	0.000882599
44.1	0.01775	44.1	0.000882599
44.2	0.0175539	44.2	0.000882599
44.3	0.0173578	44.3	0.000882599
44.4	0.0171616	44.4	0.000882599
44.5	0.0169655	44.5	0.000882599
44.6	0.0167694	44.6	0.000882599
44.7	0.0166713	44.7	0.000882599
44.8	0.0165732	44.8	0.000882599
44.9	0.0164752	44.9	0.000882599
45	0.016279	45	0.000882599
45.1	0.016181	45.1	0.000882599
45.2	0.0160829	45.2	0.000882599
45.3	0.0158868	45.3	0.000882599
45.4	0.0157887	45.4	0.000882599
45.5	0.0154945	45.5	0.000882599
45.6	0.0152984	45.6	0.000980665
45.7	0.0152003	45.7	0.000882599
45.8	0.0151022	45.8	0.000980665
45.9	0.0152003	45.9	0.000980665
46	0.0152003	46	0.000980665
46.1	0.0143177	46.1	0.000980665
46.2	0.0140235	46.2	0.000980665
46.3	0.0139254	46.3	0.000980665
46.4	0.0139254	46.4	0.000882599
46.5	0.0137293	46.5	0.000882599
46.6	0.0136312	46.6	0.000980665
46.7	0.013337	46.7	0.000980665
46.8	0.0129448	46.8	0.000980665
46.9	0.00813952	46.9	0.000980665
47	0.00804145	47	0.000980665
47.1	0.00804145	47.1	0.000980665
47.2	0.00804145	47.2	0.000980665
47.3	0.00804145	47.3	0.000980665
47.4	0.00794339	47.4	0.000882599
47.5	0.00784532	47.5	0.000882599
47.6	0.00774725	47.6	0.000882599
47.7	0.00764919	47.7	0.000980665
47.8	0.00764919	47.8	0.000980665
47.9	0.00745305	47.9	0.000980665
48	0.00735499	48	0.000980665
48.1	0.00725692	48.1	0.000980665
48.2	0.00715886	48.2	0.000980665
48.3	0.00706079	48.3	0.000980665
48.4	0.00696272	48.4	0.000980665
48.5	0.00686465	48.5	0.000980665
48.6	0.00676659	48.6	0.000980665
48.7	0.00666852	48.7	0.000980665
48.8	0.00657046	48.8	0.000980665
48.9	0.00647239	48.9	0.000980665
49	0.00647239	49	0.000980665
49.1	0.00637432	49.1	0.000980665
49.2	0.00637432	49.2	0.000980665
49.3	0.00637432	49.3	0.000980665
49.4	0.00647239	49.4	0.000980665
49.5	0.00657046	49.5	0.000980665
49.6	0.00686465	49.6	0.000980665
49.7	0.00715886	49.7	0.000980665
49.8	0.00745305	49.8	0.000980665
49.9	0.00774725	49.9	0.000980665
50	0.00804145	50	0.00107873
50.1	0.00833565	50.1	0.00107873
50.2	0.00862985	50.2	0.00107873
50.3	0.00892405	50.3	0.00107873
50.4	0.00931632	50.4	0.00107873
50.5	0.00961052	50.5	0.00107873
50.6	0.0101008	50.6	0.00107873
50.7	0.0104931	50.7	0.00107873
50.8	0.0109834	50.8	0.00107873
50.9	0.0113757	50.9	0.00107873
51	0.011866	51	0.00107873
51.1	0.0122583	51.1	0.00107873
51.2	0.0127486	51.2	0.00107873
51.3	0.013239	51.3	0.0011768
51.4	0.0136312	51.4	0.0011768
51.5	0.0140235	51.5	0.0011768
51.6	0.0145138	51.6	0.0011768
51.7	0.0149061	51.7	0.0011768
51.8	0.0152984	51.8	0.0011768
51.9	0.0157887	51.9	0.0011768
52	0.016181	52	0.0011768
52.1	0.0164752	52.1	0.00107873
52.2	0.0168674	52.2	0.00107873
52.3	0.0172597	52.3	0.00107873
52.4	0.0175539	52.4	0.00107873
52.5	0.0179462	52.5	0.00107873
52.6	0.0182404	52.6	0.0011768
52.7	0.0185346	52.7	0.0011768
52.8	0.0188288	52.8	0.0011768
52.9	0.019123	52.9	0.0011768
53	0.0194172	53	0.0011768
53.1	0.0197114	53.1	0.0011768
53.2	0.0201036	53.2	0.0011768
53.3	0.0204959	53.3	0.0011768
53.4	0.0208882	53.4	0.0011768
53.5	0.0212804	53.5	0.0011768
53.6	0.0216727	53.6	0.0011768
53.7	0.022163	53.7	0.0011768
53.8	0.0225553	53.8	0.0011768
53.9	0.0228495	53.9	0.0011768
54	0.0232418	54	0.00127486
54.1	0.023634	54.1	0.00127486
54.2	0.0240263	54.2	0.00127486
54.3	0.0244186	54.3	0.00127486
54.4	0.0248108	54.4	0.00127486
54.5	0.0252031	54.5	0.00127486
54.6	0.0256934	54.6	0.00127486
54.7	0.0261838	54.7	0.00127486
54.8	0.0266741	54.8	0.00127486
54.9	0.0272625	54.9	0.00127486
55	0.0277528	55	0.00127486
55.1	0.0282432	55.1	0.00127486
55.2	0.0289296	55.2	0.00127486
55.3	0.029518	55.3	0.00137293
55.4	0.0301064	55.4	0.00137293
55.5	0.0305967	55.5	0.00137293
55.6	0.0310871	55.6	0.00137293
55.7	0.0315774	55.7	0.00137293
55.8	0.0321658	55.8	0.00137293
55.9	0.0328523	55.9	0.001471
56	0.0335387	56	0.001471
56.1	0.0341271	56.1	0.001471
56.2	0.0346175	56.2	0.00156906
56.3	0.0351078	56.3	0.00156906
56.4	0.0355981	56.4	0.00156906
56.5	0.0361865	56.5	0.00166713
56.6	0.0365788	56.6	0.00166713
56.7	0.0370691	56.7	0.00166713
56.8	0.0375595	56.8	0.0017652
56.9	0.0379517	56.9	0.0017652
57	0.038344	57	0.00186326
57.1	0.0388343	57.1	0.00186326
57.2	0.0392266	57.2	0.00186326
57.3	0.0397169	57.3	0.00196133
57.4	0.0404034	57.4	0.00196133
57.5	0.0420705	57.5	0.0020594
57.6	0.0446203	57.6	0.0020594
57.7	0.0478565	57.7	0.00215746
57.8	0.0526617	57.8	0.00215746
57.882	0.0588399	57.9	0.00196133
57.942	0.0650181	58	0.0020594
57.987	0.0711963	58.1	0.0020594
58.022	0.0773745	58.2	0.00215746
58.052	0.0834546	58.3	0.00215746
58.079	0.0898289	58.4	0.00225553
58.103	0.0961052	58.5	0.00225553
58.125	0.102283	58.6	0.00225553
58.146	0.108658	58.7	0.0023536
58.166	0.115032	58.8	0.0023536
58.185	0.121406	58.9	0.0023536
58.203	0.127585	59	0.00245166
58.221	0.133861	59.1	0.00245166
58.239	0.140039	59.2	0.00254973
58.259	0.146315	59.3	0.00254973
58.279	0.152493	59.4	0.0026478
58.297	0.158966	59.5	0.0026478
58.312	0.165046	59.6	0.00274586
58.326	0.171224	59.7	0.00274586
58.34	0.177696	59.8	0.00284393
58.354	0.184267	59.9	0.00284393
58.367	0.190445	60	0.00294199
58.38	0.196721	60.1	0.00294199
58.393	0.202998	60.2	0.00304006
58.406	0.20947	60.3	0.00304006
58.419	0.21604	60.4	0.00313813
58.432	0.222611	60.5	0.00313813
58.444	0.228789	60.6	0.00313813
58.456	0.235065	60.7	0.00323619
58.468	0.241342	60.8	0.00323619
58.48	0.247618	60.9	0.00323619
58.492	0.253894	61	0.00333426
58.504	0.260268	61.1	0.00333426
58.516	0.266643	61.2	0.00333426
58.528	0.272919	61.3	0.00313813
58.54	0.279293	61.4	0.00274586
58.552	0.285668	61.5	0.00284393
58.564	0.291944	61.6	0.00284393
58.576	0.29822	61.7	0.00284393
58.588	0.304496	61.8	0.00294199
58.6	0.310773	61.9	0.00294199
58.612	0.317049	62	0.00304006
58.624	0.323325	62.1	0.00304006
58.636	0.329503	62.2	0.00304006
58.648	0.335682	62.3	0.00304006
58.66	0.34186	62.4	0.00304006
58.673	0.34843	62.5	0.00304006
58.686	0.355001	62.6	0.00254973
58.699	0.361571	62.7	0.0026478
58.712	0.367946	62.8	0.0026478
58.725	0.37432	62.9	0.0026478
58.738	0.380596	63	0.00274586
58.751	0.386872	63.1	0.00274586
58.764	0.392952	63.2	0.00284393
58.777	0.399131	63.3	0.00284393
58.791	0.405603	63.4	0.00284393
58.805	0.412075	63.5	0.00294199
58.819	0.418352	63.6	0.00294199
58.833	0.42453	63.7	0.00294199
58.848	0.431002	63.8	0.00304006
58.863	0.437475	63.9	0.00304006
58.878	0.443751	64	0.00313813
58.893	0.450027	64.1	0.00313813
58.908	0.456205	64.2	0.00313813
58.924	0.46258	64.3	0.00323619
58.94	0.468856	64.4	0.00323619
58.956	0.475034	64.5	0.00323619
58.973	0.481507	64.6	0.00333426
58.99	0.487783	64.7	0.00333426
59.007	0.493961	64.8	0.00343233
59.025	0.500335	64.9	0.00343233
59.043	0.506808	65	0.00353039
59.061	0.513182	65.1	0.00353039
59.079	0.519458	65.2	0.00362846
59.097	0.525636	65.3	0.00372653
59.115	0.531815	65.4	0.00372653
59.133	0.538189	65.5	0.00372653
59.15	0.544367	65.6	0.00382459
59.167	0.550545	65.7	0.00392266
59.184	0.556724	65.8	0.00392266
59.201	0.563	65.9	0.00402073
59.218	0.569178	66	0.00402073
59.235	0.575356	66.1	0.00411879
59.253	0.581829	66.2	0.00421686
59.271	0.588105	66.3	0.00421686
59.29	0.594479	66.4	0.00431493
59.309	0.600853	66.5	0.00441299
59.328	0.60713	66.6	0.00451106
59.347	0.613406	66.7	0.00460913
59.367	0.619682	66.8	0.00470719
59.388	0.626057	66.9	0.00480526
59.409	0.632333	67	0.00500139
59.431	0.638609	67.1	0.00519752
59.454	0.644885	67.2	0.00549172
59.479	0.651162	67.3	0.00578592
59.506	0.65734	67.4	0.00608012
59.539	0.663616	67.5	0.00647239
59.578	0.669696	67.6	0.00676659
59.623	0.675874	67.7	0.00715885
59.671	0.682053	67.8	0.00755112
59.713	0.688133	67.9	0.00794339
59.757	0.694409	68	0.00853179
59.808	0.700587	68.1	0.00902212
59.859	0.706765	68.2	0.00961052
59.906	0.712943	68.3	0.010297
59.948	0.719122	68.4	0.0109834
59.986	0.725398	68.5	0.0116699
60.02	0.731576	68.6	0.0123564
60.052	0.737754	68.7	0.0130428
60.089	0.743932	68.8	0.0137293
60.123	0.750111	68.9	0.0144158
60.149	0.756485	69	0.0151022
60.172	0.762761	69.1	0.0157887
60.193	0.768939	69.2	0.0164752
60.213	0.775118	69.3	0.0171616
60.233	0.781492	69.4	0.0178481
60.253	0.78767	69.5	0.0184365
60.274	0.794044	69.6	0.0190249
60.295	0.800321	69.7	0.0196133
60.316	0.806499	69.8	0.0202017
60.337	0.812775	69.9	0.0208882
60.358	0.819149	70	0.0215746
60.378	0.825426	70.1	0.0222611
60.398	0.8318	70.2	0.0229476
60.418	0.838076	70.3	0.023634
60.439	0.844451	70.4	0.0242224
60.46	0.850727	70.5	0.0247128
60.481	0.857101	70.6	0.0252031
60.502	0.863279	70.7	0.0256934
60.524	0.869556	70.8	0.0261838
60.546	0.875734	70.9	0.026478
60.568	0.88201	71	0.0268702
60.589	0.888188	71.1	0.0272625
60.61	0.894465	71.2	0.0275567
60.63	0.900741	71.3	0.0278509
60.65	0.907115	71.4	0.0281451
60.669	0.913195	71.5	0.0285374
60.689	0.91957	71.6	0.0290277
60.709	0.925944	71.7	0.02942
60.728	0.932024	71.8	0.0298122
60.747	0.938496	71.9	0.0302045
60.765	0.944871	72	0.0305967
60.783	0.951147	72.1	0.030989
60.801	0.957325	72.2	0.0312832
60.819	0.963503	72.3	0.0316755
60.837	0.969682	72.4	0.0319697
60.856	0.976056	72.5	0.0321658
60.875	0.982234	72.6	0.03246
60.895	0.988412	72.7	0.0326561
60.915	0.994492	72.8	0.0328523
60.936	1.00067	72.9	0.0330484
60.959	1.00704	73	0.0330484
60.984	1.01332	73.1	0.0331465
61.01	1.0194	73.2	0.0329503
61.037	1.02558	73.3	0.0323619
61.065	1.03186	73.4	0.0301064
61.092	1.03813	73.5	0.0303025
61.118	1.04421	73.6	0.0304987
61.145	1.05049	73.7	0.0305967
61.171	1.05667	73.8	0.0306948
61.196	1.06284	73.9	0.0307929
61.22	1.06892	74	0.0308909
61.244	1.0751	74.1	0.030989
61.268	1.08128	74.2	0.030989
61.292	1.08746	74.3	0.030989
61.317	1.09364	74.4	0.030989
61.343	1.09991	74.5	0.0310871
61.368	1.10609	74.6	0.0310871
61.394	1.11227	74.7	0.0310871
61.422	1.11855	74.8	0.0312832
61.451	1.12463	74.9	0.0313813
61.481	1.1308	75	0.0314793
61.514	1.13698	75.1	0.0315774
61.548	1.14326	75.2	0.0316755
61.582	1.14934	75.3	0.0318716
61.62	1.15542	75.4	0.0320677
61.661	1.1617	75.5	0.0323619
61.708	1.16787	75.6	0.0325581
61.753	1.17405	75.7	0.0329503
61.796	1.18023	75.8	0.0332445
61.838	1.18641	75.9	0.0338329
61.887	1.19259	76	0.0344213
61.943	1.19867	76.1	0.0351078
62.006	1.20485	76.2	0.0359904
62.059	1.21093	76.3	0.036873
62.105	1.2171	76.4	0.0378537
62.152	1.22328	76.5	0.0388343
62.195	1.22936	76.6	0.0399131
62.238	1.23564	76.7	0.0409918
62.277	1.24182	76.8	0.0421686
62.314	1.2479	76.9	0.0433454
62.35	1.25417	77	0.0446203
62.384	1.26035	77.1	0.0459932
62.419	1.26643	77.2	0.0474642
62.454	1.27271	77.3	0.0489352
62.489	1.27889	77.4	0.0504062
62.522	1.28506	77.5	0.0519752
62.554	1.29114	77.6	0.0536424
62.587	1.29732	77.7	0.0553095
62.619	1.3035	77.8	0.0571728
62.65	1.30958	77.9	0.059036
62.682	1.31576	78	0.0611935
62.713	1.32194	78.1	0.0636452
62.746	1.32821	78.2	0.0664891
62.782	1.33439	78.3	0.0700195
62.822	1.34057	78.4	0.0743344
62.87	1.34675	78.5	0.0798261
62.932	1.35283	78.593	0.0860043
63.032	1.35744	78.675	0.0920844
63.132	1.35616	78.748	0.0982626
63.232	1.35038	78.817	0.104441
63.298	1.3443	78.882	0.110521
63.35	1.33822	78.943	0.116699
63.397	1.33194	79.001	0.122779
63.441	1.32566	79.055	0.128957
63.482	1.31948	79.107	0.135038
63.525	1.31331	79.157	0.141216
63.567	1.30703	79.205	0.147296
63.606	1.30085	79.252	0.153474
63.639	1.29458	79.298	0.159554
63.669	1.2884	79.344	0.165732
63.701	1.28212	79.39	0.171911
63.734	1.27594	79.436	0.178089
63.768	1.26977	79.481	0.184267
63.806	1.26368	79.526	0.190347
63.848	1.25741	79.571	0.196525
63.897	1.25123	79.616	0.202703
63.956	1.24505	79.661	0.208882
64.016	1.23897	79.706	0.21506
64.09	1.23279	79.751	0.221238
64.183	1.22671	79.797	0.227416
64.283	1.2224	79.843	0.233594
64.383	1.22005	79.89	0.239773
64.483	1.22152	79.936	0.245853
64.583	1.22465	79.983	0.252031
64.683	1.22887	80.03	0.258209
64.783	1.23407	80.078	0.264289
64.882	1.24025	80.126	0.270467
64.963	1.24633	80.175	0.276646
65.033	1.25251	80.224	0.282726
65.102	1.25859	80.274	0.288904
65.167	1.26476	80.325	0.295082
65.23	1.27094	80.377	0.30126
65.294	1.27702	80.43	0.30734
65.358	1.2831	80.484	0.313519
65.412	1.28938	80.539	0.319697
65.465	1.29546	80.594	0.325875
65.517	1.30173	80.649	0.331955
65.566	1.30781	80.705	0.338133
65.614	1.31409	80.76	0.344311
65.66	1.32017	80.815	0.35049
65.706	1.32635	80.869	0.356668
65.753	1.33263	80.924	0.362846
65.799	1.33871	80.981	0.368926
65.842	1.34488	81.04	0.375104
65.888	1.35096	81.101	0.381184
65.934	1.35724	81.166	0.387363
65.984	1.36332	81.233	0.393541
66.036	1.3695	81.304	0.399621
66.088	1.37568	81.383	0.405701
66.148	1.38186	81.473	0.411879
66.223	1.38794	81.573	0.417763
66.301	1.39411	81.673	0.42247
66.401	1.39892	81.773	0.424922
66.501	1.40343	81.873	0.428256
66.601	1.40745	81.973	0.431885
66.701	1.41049	82.073	0.435709
66.801	1.41265	82.173	0.439632
66.901	1.41392	82.273	0.443555
67.001	1.41471	82.373	0.447379
67.101	1.41569	82.473	0.451302
67.201	1.41706	82.573	0.455323
67.301	1.41843	82.673	0.458951
67.401	1.41951	82.773	0.461991
67.501	1.41932	82.873	0.46258
67.601	1.41912	82.973	0.45748
67.701	1.4203	83.073	0.459245
67.801	1.42069	83.173	0.461991
67.901	1.42098	83.257	0.468169
68.001	1.42059	83.328	0.474348
68.101	1.4201	83.394	0.480526
68.201	1.41932	83.459	0.486704
68.301	1.41843	83.524	0.492882
68.401	1.41686	83.59	0.49906
68.501	1.41686	83.69	0.504356
68.601	1.41853	83.735	0.510534
68.701	1.41902	83.774	0.51681
68.801	1.42118	83.81	0.522989
68.901	1.425	83.843	0.529265
68.998	1.43108	83.881	0.535443
69.069	1.43726	83.914	0.541621
69.124	1.44344	83.941	0.547799
69.167	1.44962	83.965	0.554174
69.201	1.4557	83.986	0.560352
69.229	1.46198	84.006	0.566726
69.253	1.46825	84.025	0.572806
69.273	1.47453	84.044	0.578985
69.29	1.4808	84.063	0.585261
69.305	1.48708	84.081	0.591439
69.319	1.49355	84.099	0.597911
69.332	1.50012	84.116	0.604188
69.344	1.5065	84.133	0.610562
69.356	1.51317	84.15	0.616936
69.367	1.51964	84.166	0.623115
69.378	1.52631	84.182	0.629391
69.388	1.53258	84.198	0.635765
69.398	1.53915	84.214	0.642238
69.407	1.54523	84.23	0.64871
69.416	1.55161	84.246	0.655084
69.425	1.55808	84.261	0.661262
69.434	1.56475	84.276	0.667735
69.443	1.57152	84.29	0.673913
69.451	1.57779	84.304	0.680287
69.459	1.58417	84.318	0.68676
69.467	1.59083	84.332	0.69333
69.475	1.5978	84.345	0.699508
69.482	1.60398	84.358	0.705883
69.489	1.61035	84.371	0.712355
69.496	1.61682	84.383	0.718533
69.503	1.62349	84.395	0.724711
69.51	1.63036	84.407	0.73089
69.517	1.63722	84.419	0.737166
69.524	1.64428	84.431	0.74354
69.53	1.65046	84.443	0.750013
69.536	1.65674	84.455	0.756681
69.542	1.66301	84.466	0.762859
69.548	1.66948	84.477	0.769136
69.554	1.67605	84.488	0.77551
69.56	1.68263	84.499	0.781884
69.566	1.68949	84.51	0.788455
69.572	1.69635	84.521	0.795221
69.578	1.70342	84.531	0.801399
69.584	1.71048	84.541	0.807774
69.59	1.71773	84.551	0.814246
69.595	1.72391	84.561	0.820915
69.6	1.73009	84.571	0.827681
69.605	1.73637	84.58	0.833859
69.61	1.74274	84.589	0.840234
69.615	1.74921	84.598	0.846706
69.62	1.75568	84.607	0.853277
69.625	1.76226	84.616	0.860043
69.63	1.76902	84.625	0.866908
69.635	1.77579	84.633	0.872988
69.64	1.78265	84.641	0.879166
69.645	1.78952	84.649	0.885442
69.65	1.79658	84.657	0.891817
69.655	1.80374	84.665	0.898191
69.66	1.8109	84.673	0.904565
69.665	1.81825	84.681	0.911038
69.67	1.8257	84.689	0.917608
69.675	1.83316	84.697	0.924179
69.68	1.84071	84.705	0.930749
69.685	1.84826	84.713	0.937418
69.689	1.85444	84.721	0.944086
69.693	1.86062	84.729	0.950853
69.697	1.86679	84.737	0.957619
69.701	1.87317	84.745	0.964386
69.705	1.87944	84.753	0.971251
69.709	1.88582	84.761	0.978115
69.713	1.89219	84.769	0.985078
69.717	1.89857	84.777	0.991943
69.721	1.90504	84.784	0.998121
69.725	1.91151	84.791	1.0043
69.729	1.91808	84.798	1.01048
69.733	1.92465	84.805	1.01675
69.737	1.93122	84.812	1.02313
69.741	1.93789	84.819	1.0295
69.745	1.94466	84.826	1.03588
69.749	1.95133	84.833	1.04225
69.753	1.95809	84.84	1.04863
69.757	1.96496	84.847	1.0551
69.761	1.97182	84.854	1.06147
69.765	1.97879	84.861	1.06794
69.769	1.98565	84.868	1.07451
69.773	1.99271	84.875	1.08099
69.777	1.99967	84.882	1.08766
69.781	2.00683	84.889	1.09432
69.785	2.01389	84.896	1.10109
69.789	2.02105	84.903	1.10796
69.793	2.02821	84.91	1.11482
69.797	2.03547	84.917	1.12178
69.801	2.04273	84.924	1.12884
69.805	2.05008	84.931	1.136
69.809	2.05744	84.937	1.14208
69.813	2.06469	84.943	1.14826
69.817	2.07215	84.949	1.15454
69.821	2.0795	84.955	1.16081
69.825	2.08695	84.961	1.16719
69.829	2.09441	84.967	1.17366
69.833	2.10196	84.973	1.18013
69.837	2.10951	84.979	1.1867
69.841	2.11706	84.985	1.19337
69.845	2.12471	84.991	1.20004
69.849	2.13226	84.997	1.20681
69.853	2.13991	85.003	1.21367
69.857	2.14746	85.009	1.22054
69.861	2.15511	85.015	1.2275
69.865	2.16276	85.021	1.23446
69.869	2.17051	85.027	1.24152
69.873	2.17816	85.033	1.24868
69.877	2.1858	85.039	1.25594
69.881	2.19355	85.045	1.26319
69.885	2.2012	85.05	1.26927
69.889	2.20885	85.055	1.27545
69.893	2.2166	85.06	1.28173
69.897	2.22425	85.065	1.28801
69.901	2.23199	85.07	1.29428
69.905	2.23974	85.075	1.30066
69.909	2.24749	85.08	1.30713
69.913	2.25524	85.085	1.3135
69.917	2.26298	85.09	1.32007
69.921	2.27073	85.095	1.32664
69.925	2.27848	85.1	1.33321
69.929	2.28632	85.105	1.33978
69.933	2.29417	85.11	1.34655
69.937	2.30201	85.115	1.35322
69.941	2.30986	85.12	1.35999
69.945	2.3178	85.125	1.36685
69.949	2.32575	85.13	1.37372
69.953	2.33369	85.135	1.38068
69.957	2.34163	85.14	1.38754
69.961	2.34958	85.145	1.3946
69.965	2.35752	85.15	1.40157
69.969	2.36556	85.155	1.40873
69.973	2.3736	85.16	1.41579
69.977	2.38164	85.165	1.42294
69.981	2.38968	85.17	1.4302
69.985	2.39782	85.175	1.43736
69.989	2.40587	85.18	1.44462
69.991	2.40989	85.185	1.45187
		85.19	1.45913
		85.195	1.46649
		85.2	1.47374
		85.205	1.4811
		85.21	1.48845
		85.215	1.49591
		85.22	1.50326
		85.225	1.51081
		85.23	1.51827
		85.235	1.52582
		85.24	1.53337
		85.245	1.54092
		85.25	1.54857
		85.254	1.55465
		85.258	1.56083
		85.262	1.56691
		85.266	1.57308
		85.27	1.57926
		85.274	1.58544
		85.278	1.59162
		85.282	1.5978
		85.286	1.60398
		85.29	1.61025
		85.294	1.61643
		85.298	1.62271
		85.302	1.62898
		85.306	1.63526
		85.31	1.64144
		85.314	1.64771
		85.318	1.65409
		85.322	1.66036
		85.326	1.66664
		85.33	1.67301
		85.334	1.67939
		85.338	1.68567
		85.342	1.69204
		85.346	1.69841
		85.35	1.70469
		85.354	1.71106
		85.358	1.71744
		85.362	1.72381
		85.366	1.73019
		85.37	1.73656
		85.374	1.74294
		85.378	1.74931
		85.382	1.75568
		85.386	1.76206
		85.39	1.76834
		85.394	1.77471
		85.398	1.78108
		85.402	1.78746
		85.406	1.79383
		85.41	1.80011
		85.414	1.80648
		85.418	1.81286
		85.422	1.81923
		85.426	1.82561
		85.43	1.83198
		85.434	1.83835
		85.438	1.84473
		85.442	1.8512
		85.446	1.85758
		85.45	1.86395
		85.454	1.87032
		85.458	1.8767
		85.462	1.88307
		85.466	1.88945
		85.47	1.89582
		85.474	1.9022
		85.478	1.90857
		85.482	1.91494
		85.486	1.92122
		85.49	1.9276
		85.494	1.93397
		85.498	1.94034
		85.502	1.94672
		85.506	1.95309
		85.51	1.95947
		85.514	1.96584
		85.518	1.97222
		85.522	1.97869
		85.526	1.98506
		85.53	1.99144
		85.534	1.99781
		85.538	2.00428
		85.542	2.01066
		85.546	2.01703
		85.55	2.02331
		85.554	2.02968
		85.558	2.03596
		85.562	2.04214
		85.566	2.04841
		85.57	2.05469
		85.574	2.06097
		85.578	2.06714
		85.582	2.07332
		85.586	2.0795
		85.59	2.08568
		85.594	2.09186
		85.598	2.09794
		85.602	2.10411
		85.606	2.11029
		85.61	2.11637
		85.614	2.12255
		85.618	2.12863
		85.623	2.13618
		85.628	2.14383
		85.633	2.15138
		85.638	2.15903
		85.643	2.16658
		85.648	2.17413
		85.653	2.18169
		85.658	2.18914
		85.663	2.19669
		85.668	2.20414
		85.673	2.2116
		85.678	2.21905
		85.683	2.2265
		85.688	2.23395
		85.693	2.24131
		85.698	2.24866
		85.703	2.25612
		85.708	2.26347
		85.713	2.27083
		85.718	2.27808
		85.723	2.28544
		85.728	2.2927
		85.733	2.29995
		85.738	2.30711
		85.743	2.31437
		85.748	2.32153
		85.753	2.32859
		85.758	2.33575
		85.763	2.34281
		85.768	2.34977
		85.773	2.35683
		85.778	2.36379
		85.783	2.37076
		85.788	2.37772
		85.793	2.38459
		85.798	2.39145
		85.803	2.39831
		85.808	2.40528
		85.813	2.41214
		85.818	2.41901
