# Supplementary figures and images for: A Framework for Soft Mechanism Driven Robots
Source: Research Square preprint supplement (doi:10.21203/rs.3.rs-4109720/v1), 2024-03-28

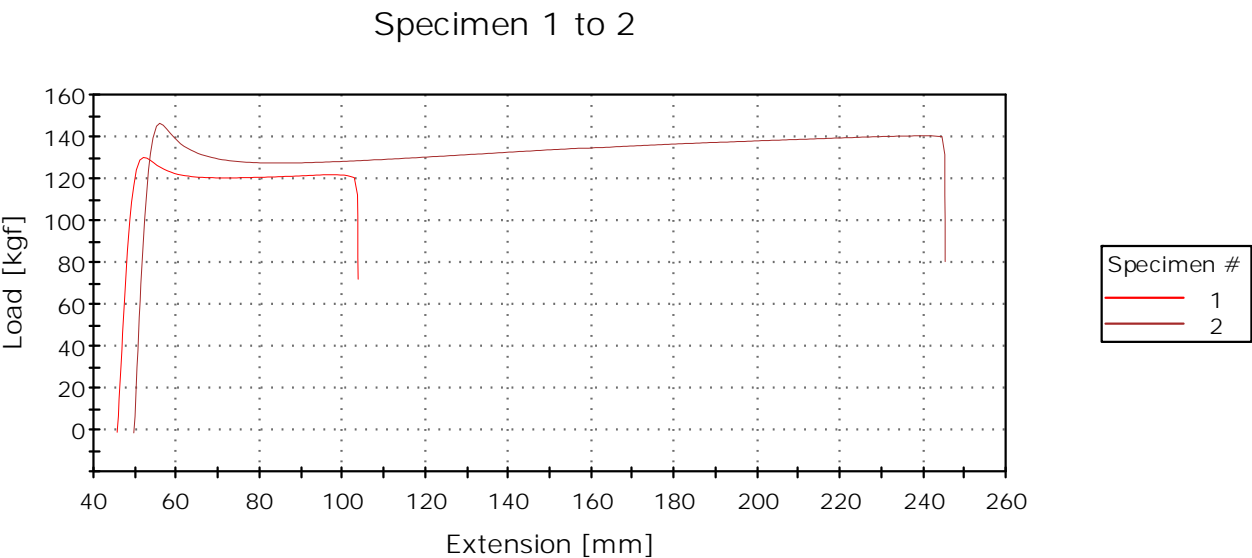

Supplement: Supplementary file 1 [file Armadillo.is_tens.pdf › Armadillo/Armadillo.is_tens.pdf]

Specimen 1 to 1

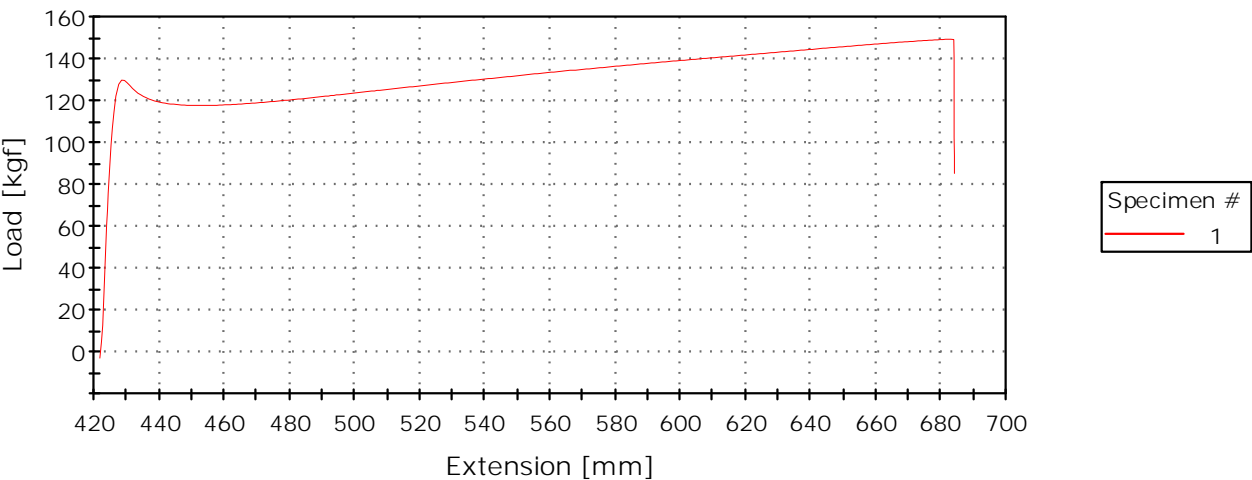

Supplement: Supplementary file 2 [file ArmadilloSolid.is_tens.pdf › Armadillo/Armadillo.is_tens_RawData/ArmadilloSolid.is_tens.pdf]

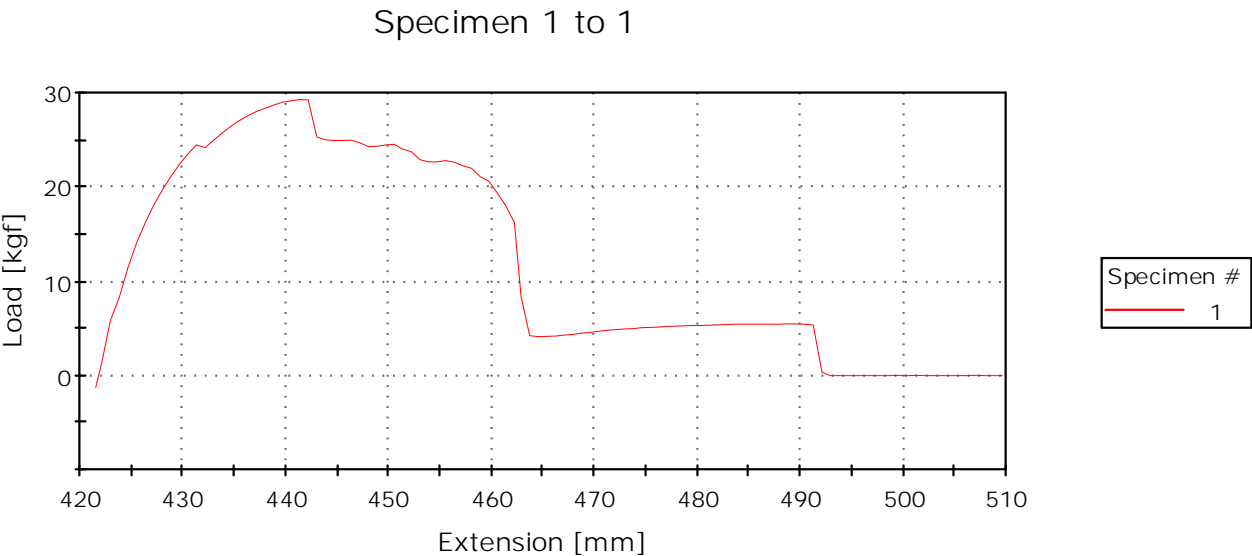

Supplement: Supplementary file 3 [file ArmadilloCheetahDovetail_v2.is_tens.pdf › ArmadilloCheetahDovetail/ArmadilloCheetahDovetail_v2.is_tens.pdf]

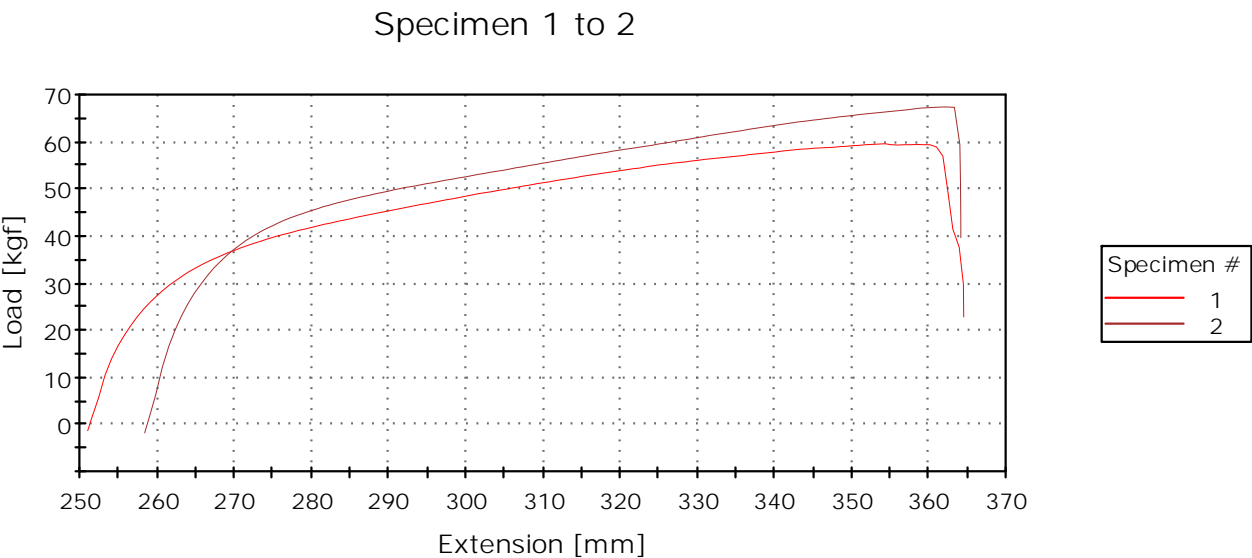

Supplement: Supplementary file 4 [file ArmadilloCheetah_Dovetail.is_tens.pdf › ArmadilloCheetahDovetail/ArmadilloCheetah_Dovetail.is_tens.pdf]

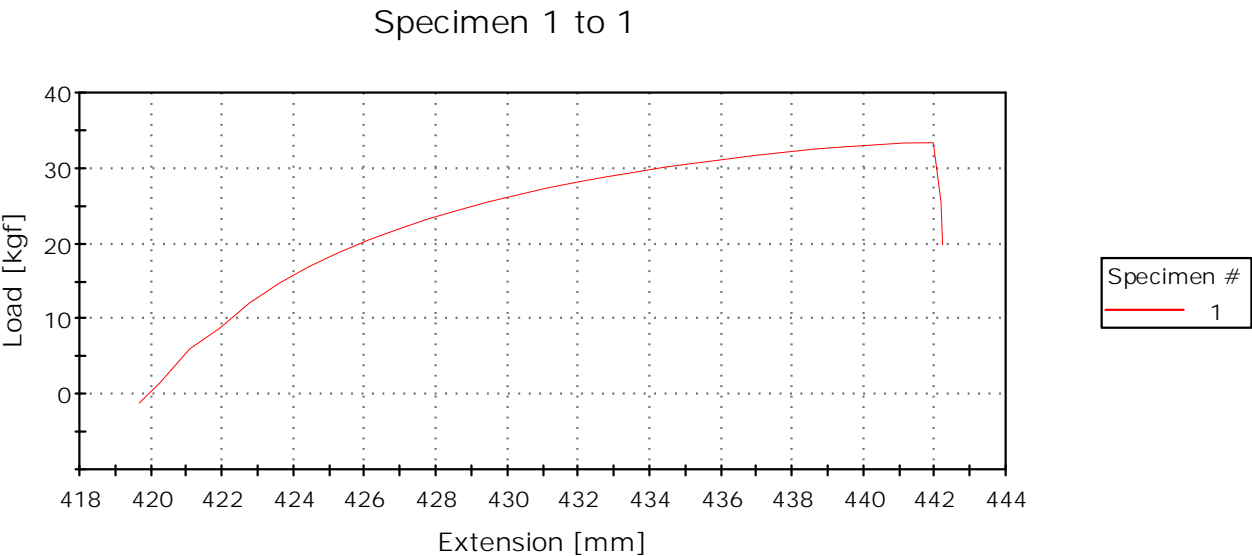

Supplement: Supplementary file 5 [file ArmadilloCheetahFingers_v2.is_tens.pdf › ArmadilloCheetahFingers/ArmadilloCheetahFingers_v2.is_tens.pdf]

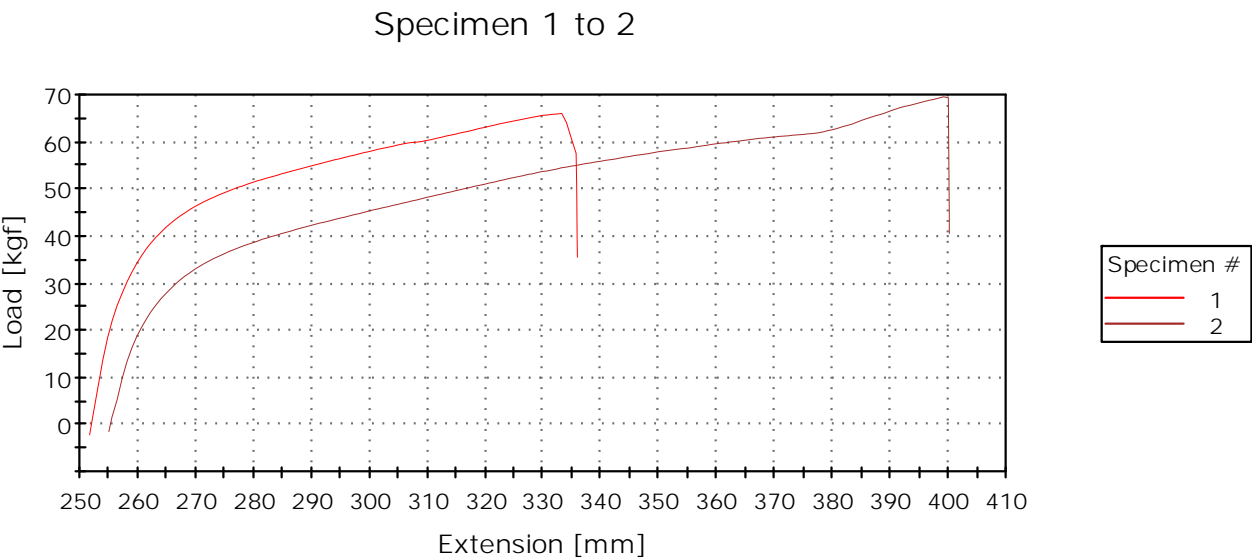

Supplement: Supplementary file 6 [file ArmadilloCheetah_Fingers_1.is_tens.pdf › ArmadilloCheetahFingers/ArmadilloCheetah_Fingers_1.is_tens.pdf]

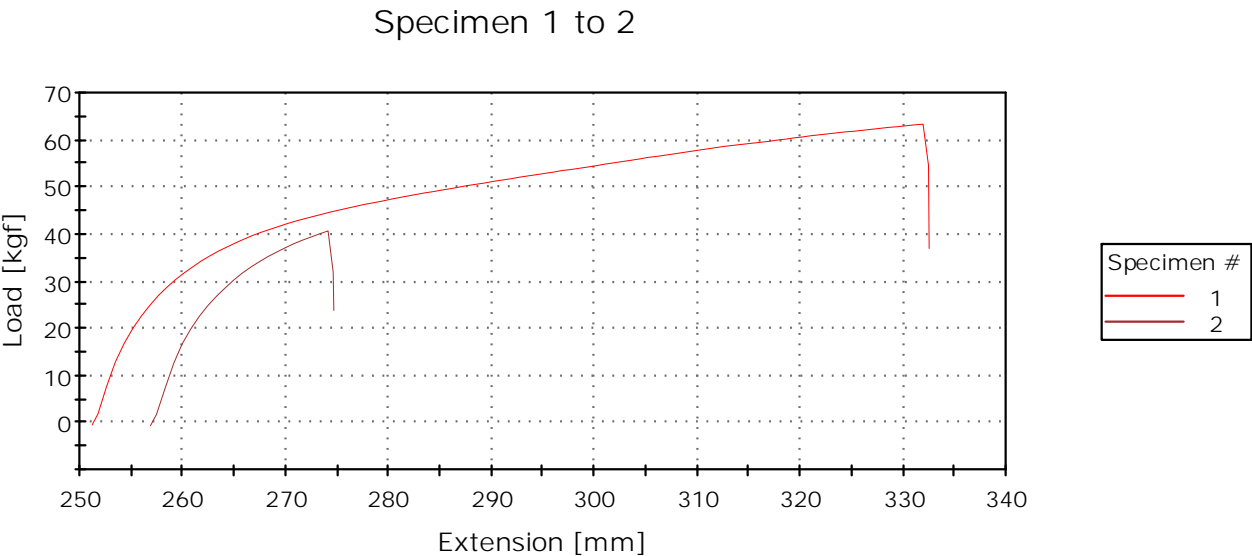

Supplement: Supplementary file 7 [file ArmadilloCheetahStraight.is_tens.pdf › ArmadilloCheetahStraight/ArmadilloCheetahStraight.is_tens.pdf]

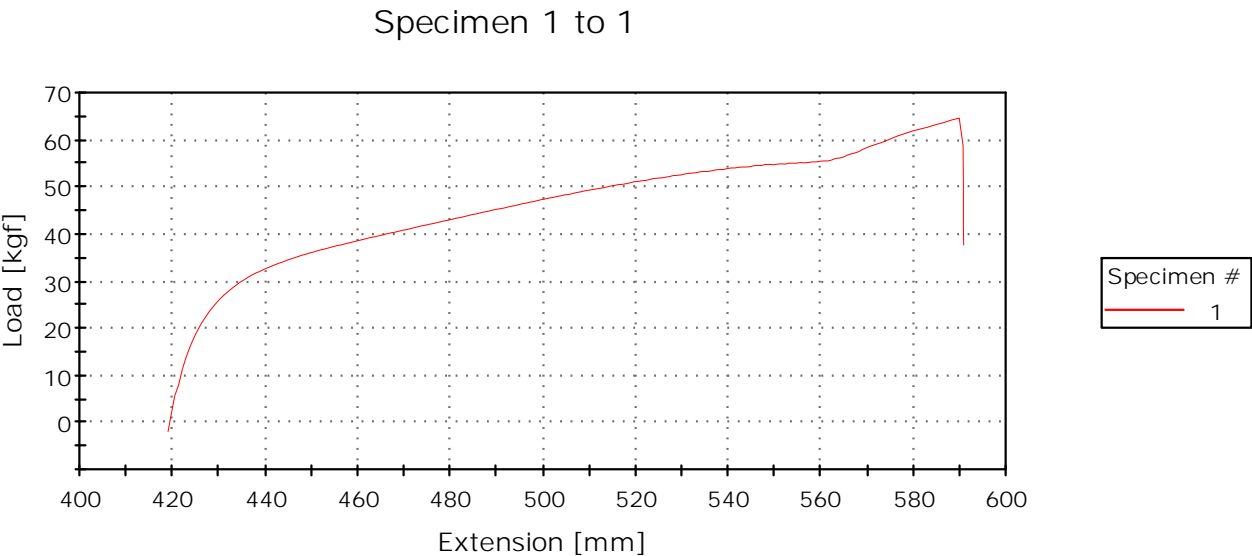

Supplement: Supplementary file 8 [file ArmadilloCheetahStraight_v2.is_tens.pdf › ArmadilloCheetahStraight/ArmadilloCheetahStraight_v2.is_tens.pdf]

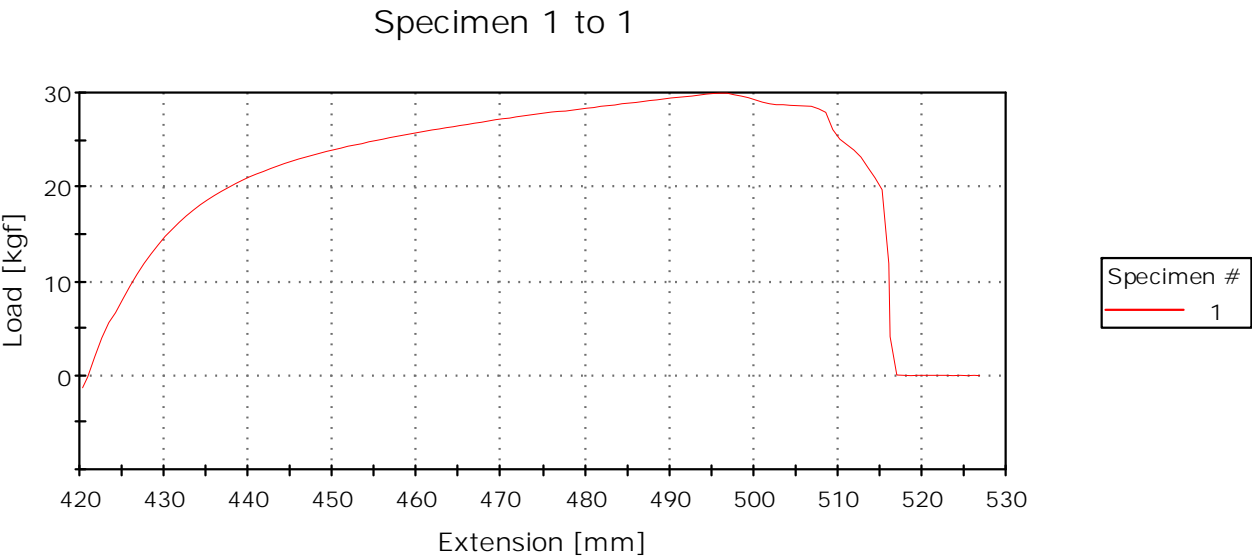

Supplement: Supplementary file 9 [file ArmadilloNinjaflexDovetail_v2.is_tens.pdf › ArmadilloNinjaflexDovetail/ArmadilloNinjaflexDovetail_v2.is_tens.pdf]

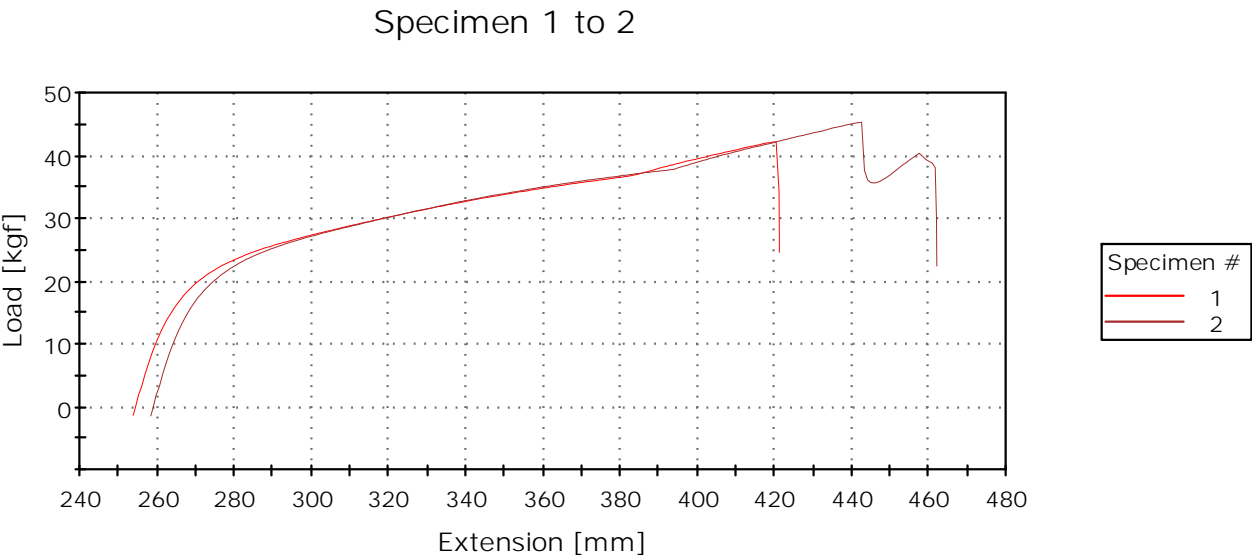

Supplement: Supplementary file 10 [file ArmadilloNinjaflex_Dovetail.is_tens.pdf › ArmadilloNinjaflexDovetail/ArmadilloNinjaflex_Dovetail.is_tens.pdf]

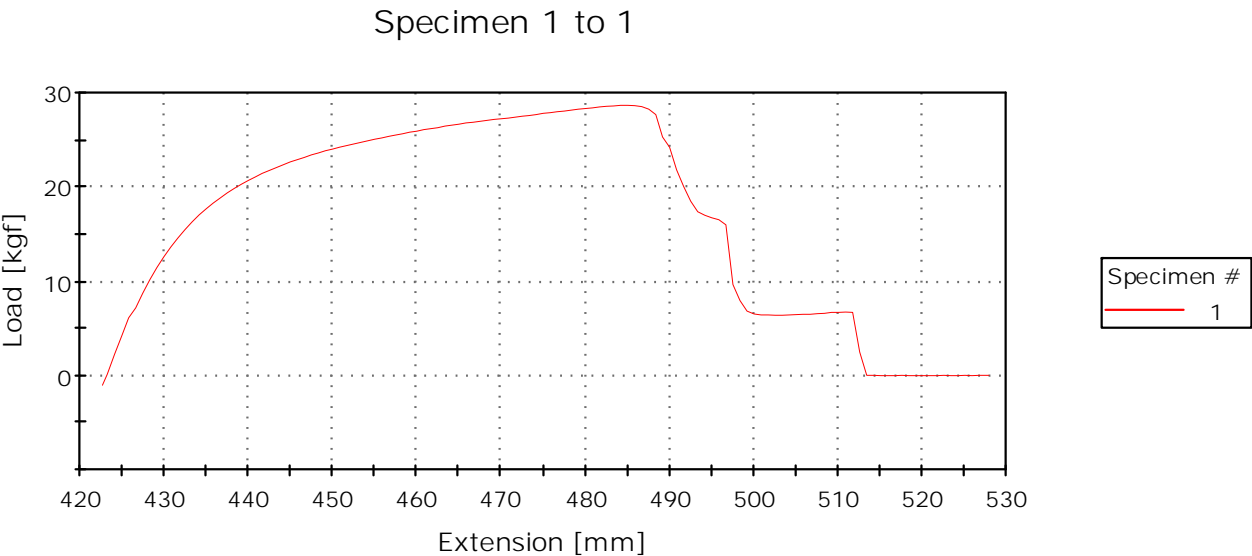

Supplement: Supplementary file 11 [file ArmadilloNinjaflexFingers_v2.is_tens.pdf › ArmadilloNinjaflexFingers/ArmadilloNinjaflexFingers_v2.is_tens.pdf]

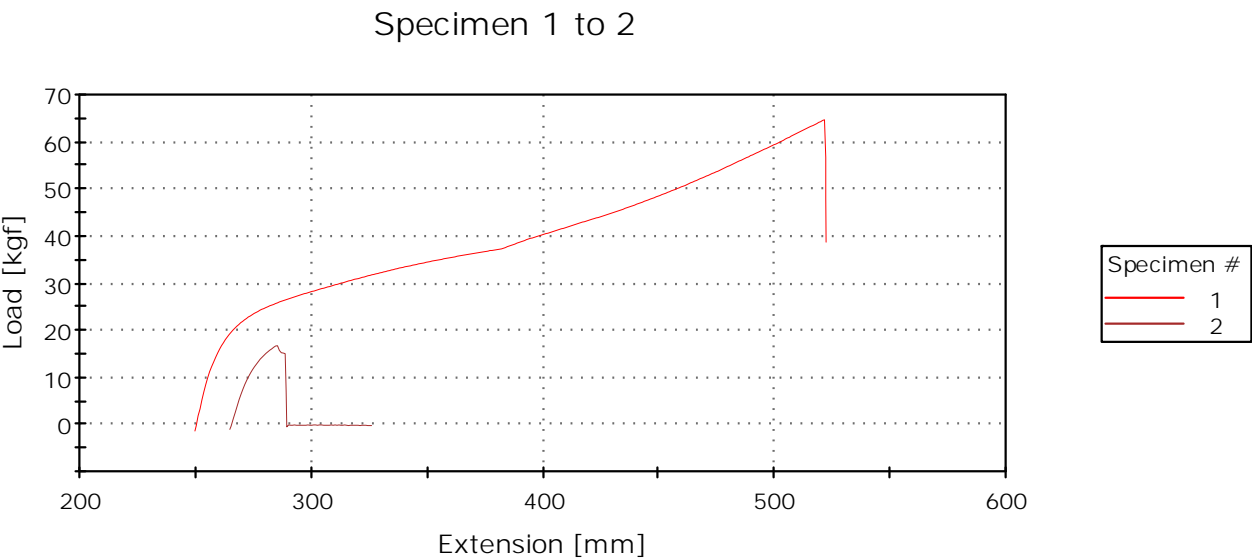

Supplement: Supplementary file 12 [file ArmadilloNinjaflex_Fingers.is_tens.pdf › ArmadilloNinjaflexFingers/ArmadilloNinjaflex_Fingers.is_tens.pdf]

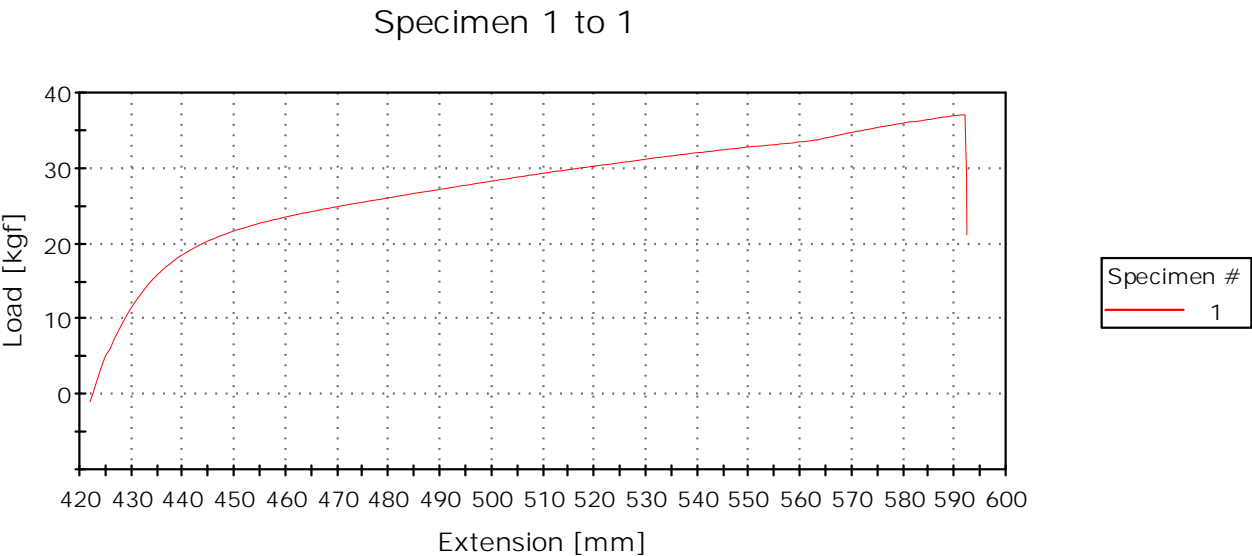

Supplement: Supplementary file 13 [file ArmadilloNinjaflexStraight_v2.is_tens.pdf › ArmadilloNinjaflexStraight/ArmadilloNinjaflexStraight_v2.is_tens.pdf]

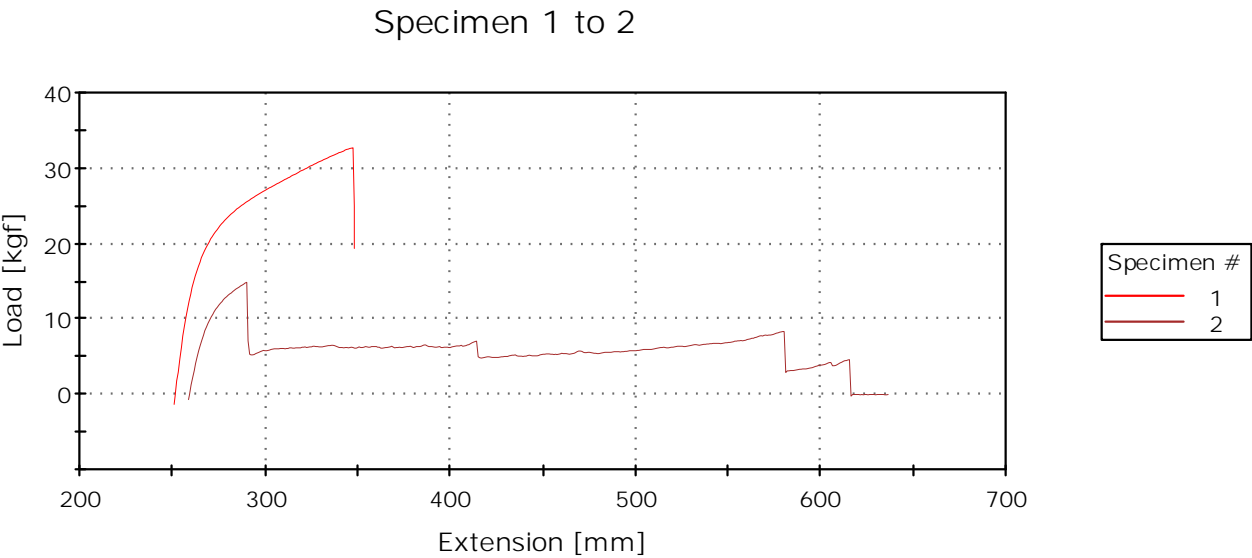

Supplement: Supplementary file 14 [file ArmadilloNinjaflex_Straight.is_tens.pdf › ArmadilloNinjaflexStraight/ArmadilloNinjaflex_Straight.is_tens.pdf]

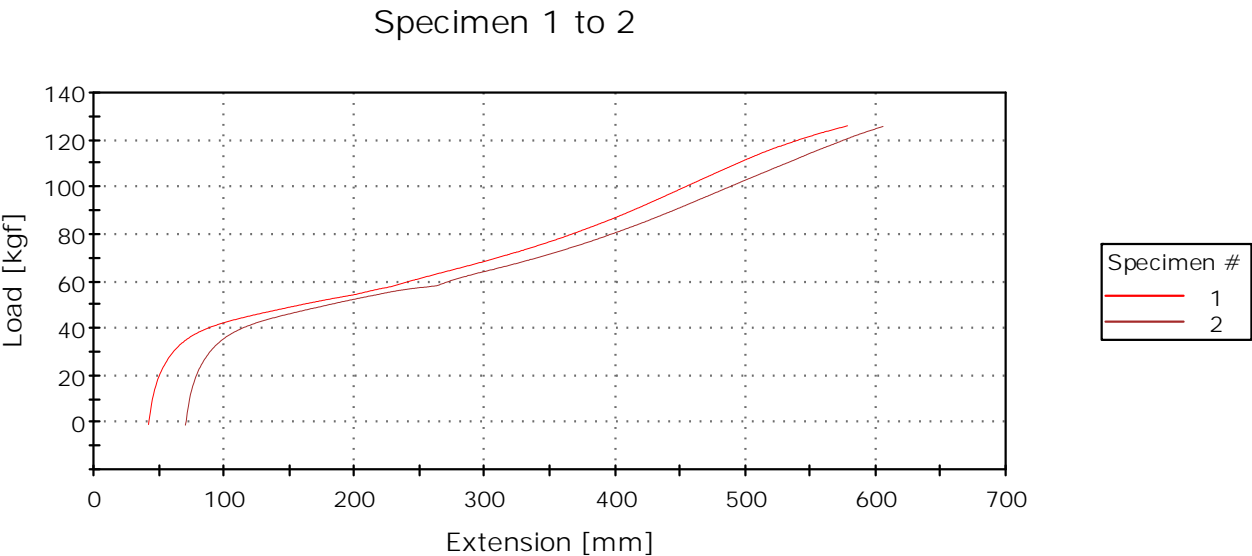

Supplement: Supplementary file 15 [file Cheetah.is_tens.pdf › Cheetah/Cheetah.is_tens.pdf]

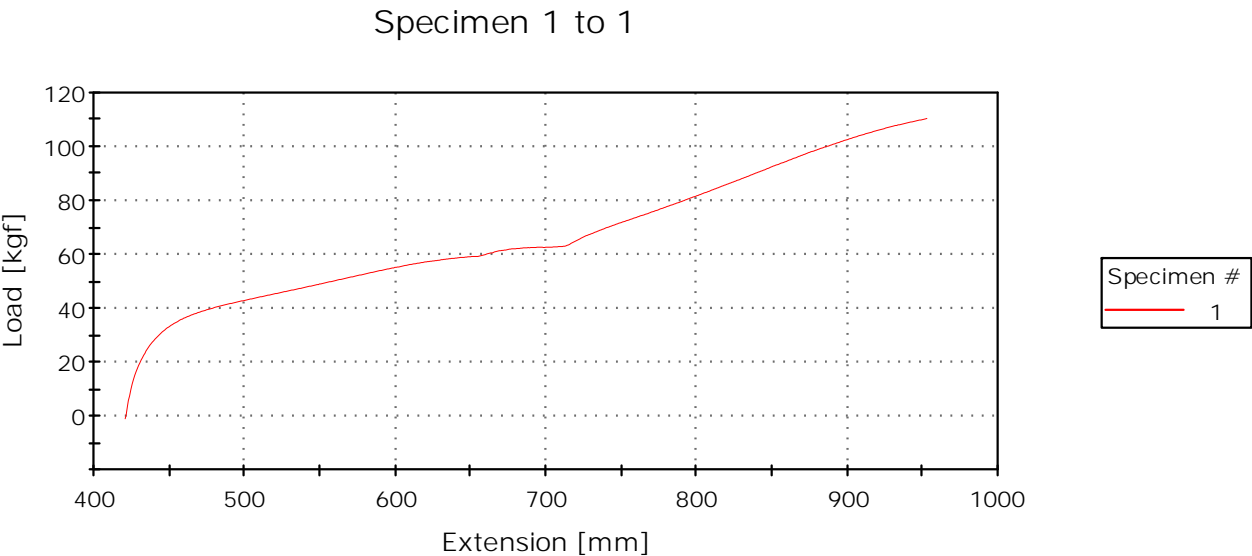

Supplement: Supplementary file 16 [file CheetahSolid.is_tens.pdf › Cheetah/CheetahSolid.is_tens.pdf]

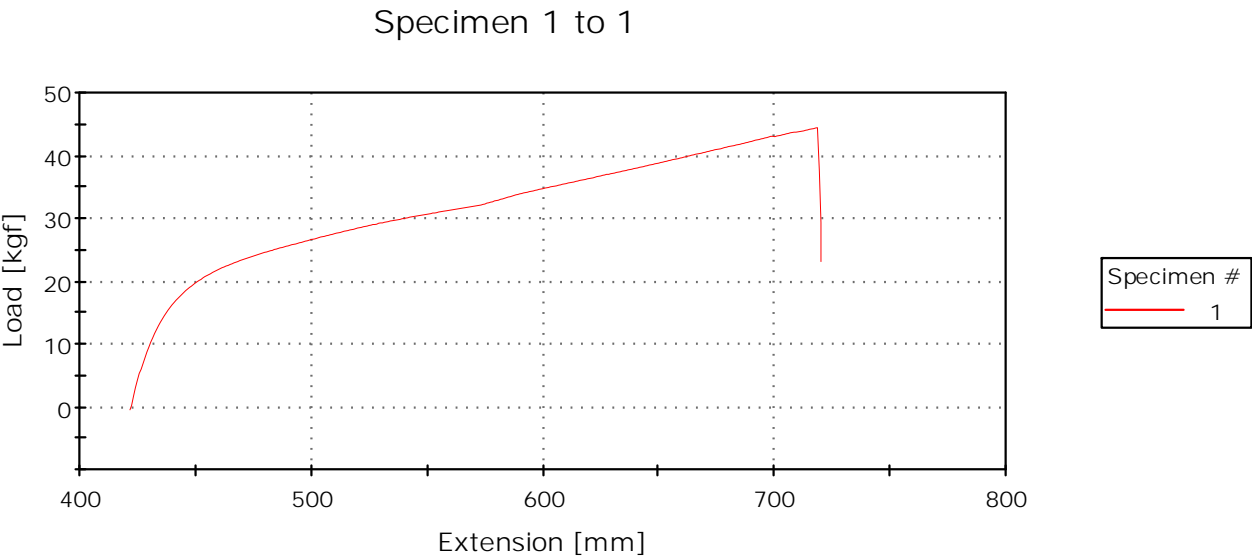

Supplement: Supplementary file 17 [file CheetahNinjaflexDovetail_v2.is_tens.pdf › CheetahNinjaflexDovetail/CheetahNinjaflexDovetail_v2.is_tens.pdf]

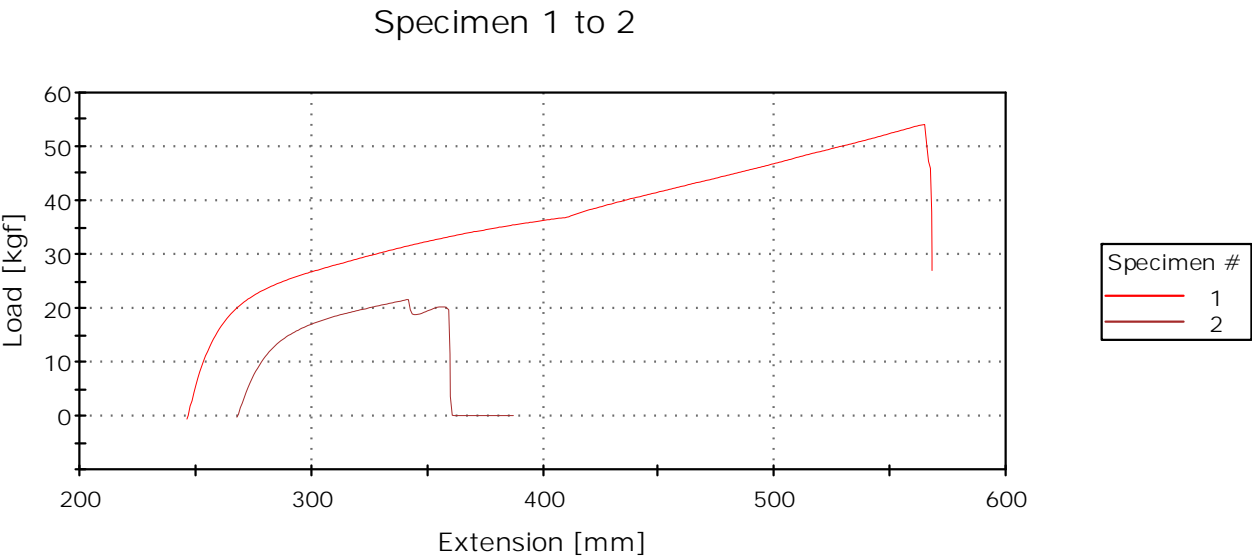

Supplement: Supplementary file 18 [file CheetahNinjaflex_Dovetail.is_tens.pdf › CheetahNinjaflexDovetail/CheetahNinjaflex_Dovetail.is_tens.pdf]

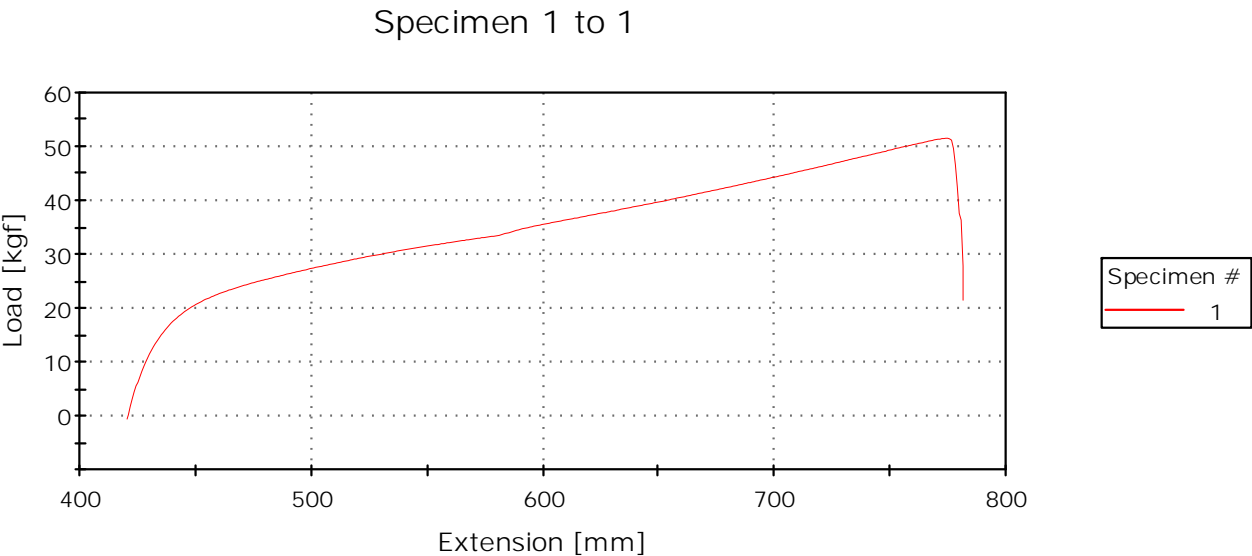

Supplement: Supplementary file 19 [file CheetahNinjaflexFingers_v2.is_tens.pdf › CheetahNinjaflexFingers/CheetahNinjaflexFingers_v2.is_tens.pdf]

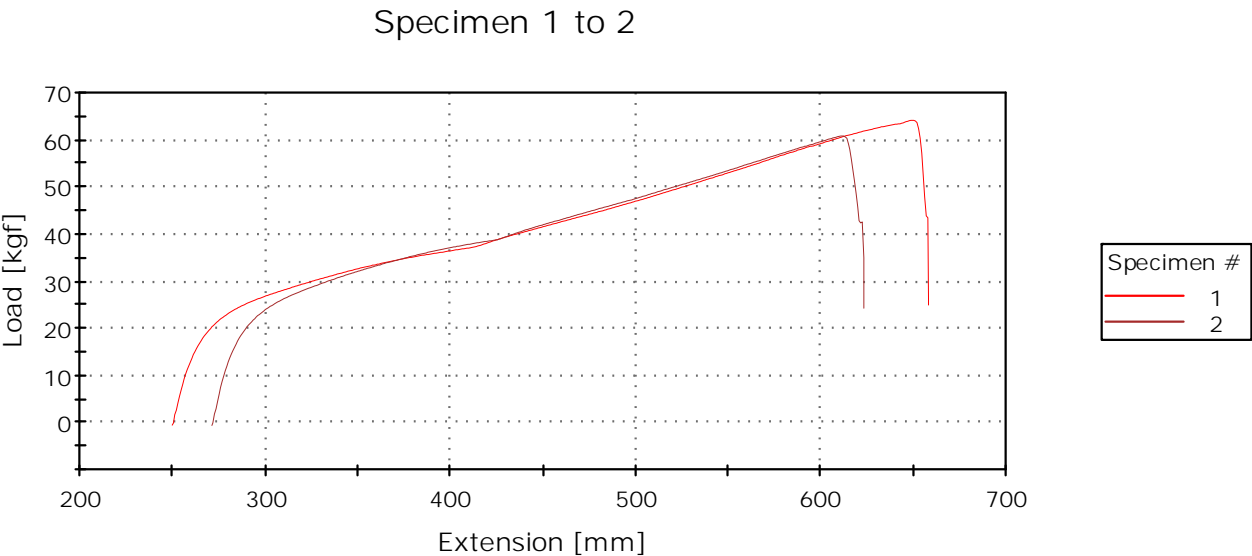

Supplement: Supplementary file 20 [file CheetahNinjaflex_Fingers.is_tens.pdf › CheetahNinjaflexFingers/CheetahNinjaflex_Fingers.is_tens.pdf]

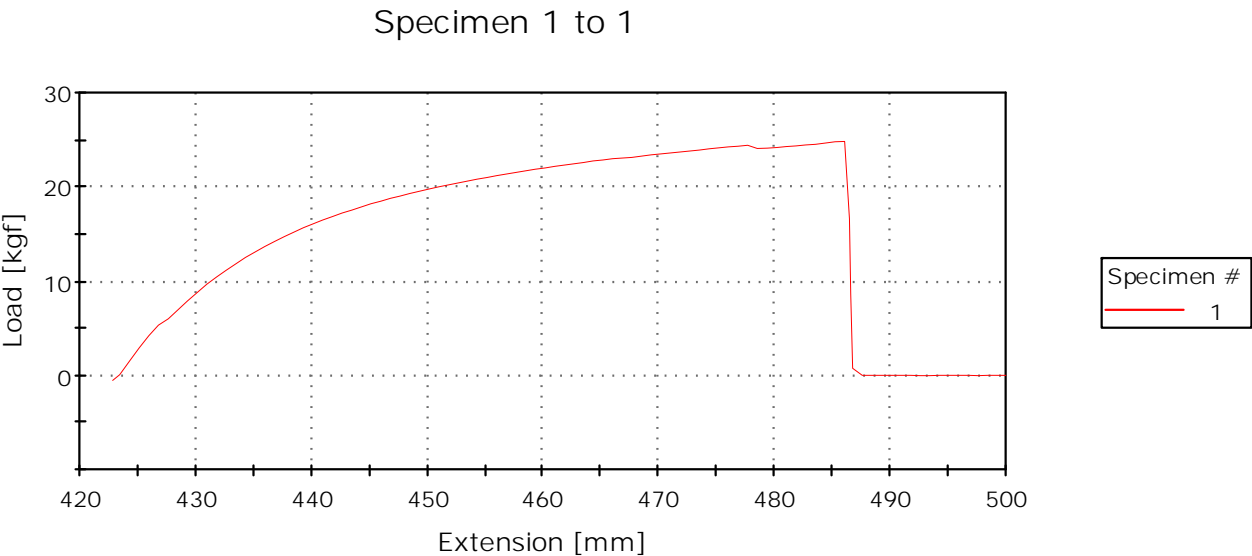

Supplement: Supplementary file 21 [file CheetahNinjaflexStraight_v2.is_tens.pdf › CheetahNinjaflexStraight/CheetahNinjaflexStraight_v2.is_tens.pdf]

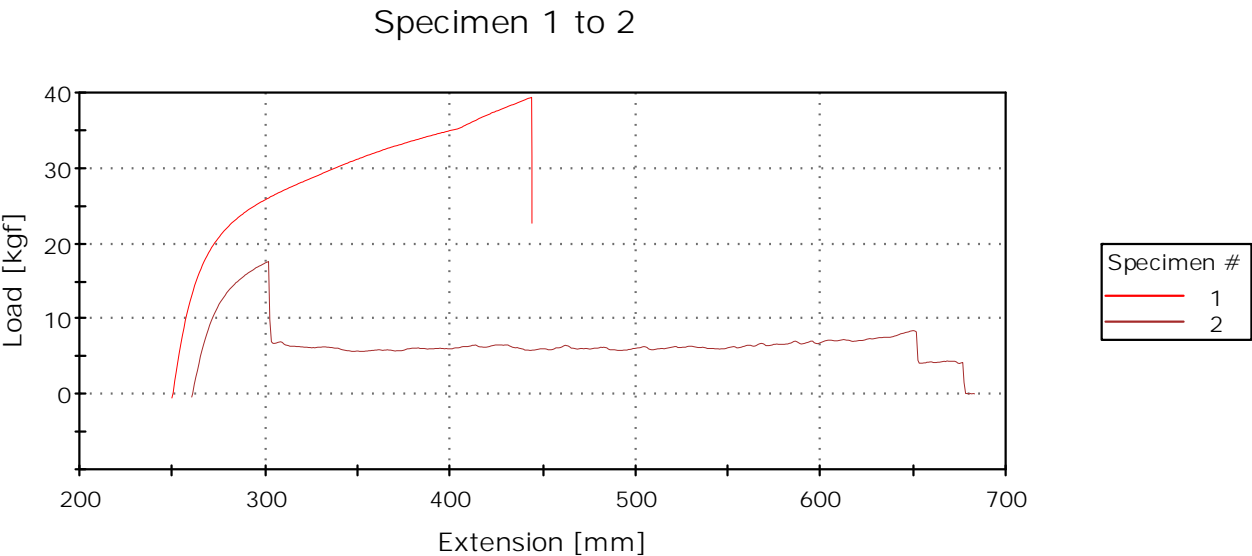

Supplement: Supplementary file 22 [file CheetahNinjaflex_Straight.is_tens.pdf › CheetahNinjaflexStraight/CheetahNinjaflex_Straight.is_tens.pdf]

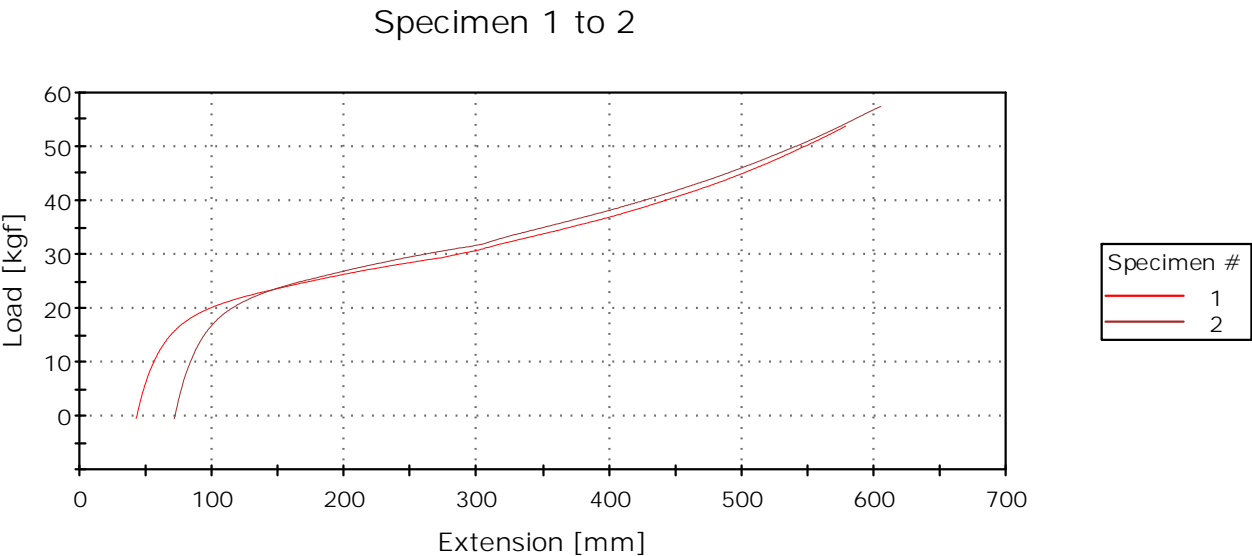

Supplement: Supplementary file 23 [file Ninjaflex.is_tens.pdf › Ninjaflex/Ninjaflex.is_tens.pdf]

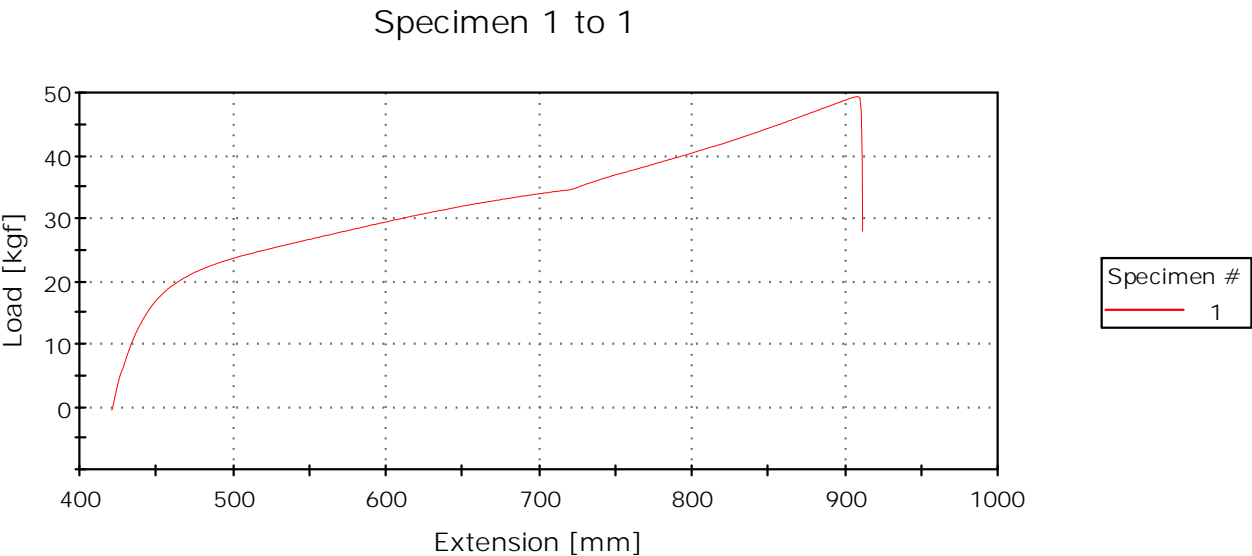

Supplement: Supplementary file 24 [file NinjaflexSolid.is_tens.pdf › Ninjaflex/NinjaflexSolid.is_tens.pdf]
